# Supplementary material for: Identification and transcriptomic profiling of salinity stress response genes in colored wheat mutant
Source: PeerJ. 2024 Mar 6;12:e17043. doi: 10.7717/peerj.17043 (PMC10924784; doi:10.7717/peerj.17043)
Supplement: Supplemental Information 4 [file peerj-12-17043-s004.xlsx]

## Sheet: Sheet1
Supplementary Table 1. The details of the primers used in this study
Group	GENE	DESCRIPTION	FORWARD PRIMER	REVERSE PRIMER	References
Cluster 1	TRAESCS1B02G095800	Peroxidase 2	CCCAACAACATCAGGGACGA	GTCGGAGTTGAAGGTGACGA	International wheat genome sequencing consortium(IWGSC)
	TRAESCS1B02G038700	protein NRT1/ PTR FAMILY 6.2	GGACCGTGGAAAGAGTGAGA	CCGTTCGTCAGATATTGCGGT	International wheat genome sequencing consortium(IWGSC)
	TRAESCS1B02G138100	auxin-responsive protein IAA15	TTTTGCCCAGCACGCTATTG	GGAGAACAGGGACCACAGTC	International wheat genome sequencing consortium(IWGSC)
	TRAESCS1B02G102200	replication protein A 70 kDa DNA-binding subunit C-like	CAGCATCCCTAAGCAGCAGT	GGGTTTCCCCGCCATTCTTA	International wheat genome sequencing consortium(IWGSC)
Cluster 2	TRAESCS2A02G046200	nuclear transport factor 2 (NTF2)-like protein	AACGGGCTACAACTCTCTGG	GCGGACTATTCACCAACTGCT	International wheat genome sequencing consortium(IWGSC)
	TRAESCS1B02G048900	histone H2A	TAGTGCGGTGTGCTGATTGT	TGAACAGAGACAAATTCAGTTCAG	International wheat genome sequencing consortium(IWGSC)
	TRAESCS1B02G071800	thylakoid membrane protein TERC, chloroplastic	TGGAGAGGAAGAGCACCACT	TTCTGACGGCCGAGTCTTTC	International wheat genome sequencing consortium(IWGSC)
	TRAESCS7D02G246600	probable histone H2A variant 3	TGTGATGGGGCTAGCTTTCG	AGTTGCAGTGATCTTGAGCGA	International wheat genome sequencing consortium(IWGSC)
Cluster 3	TRAESCS6B02G466700	protein argonaute 1C-like isoform X2	AAACCAGAGCATTCAAGCCAC	CTTACACCGCACATTCGTCC	International wheat genome sequencing consortium(IWGSC)
	TRAESCS1B02G105100	ribosome biogenesis protein NOP53	CCACTCGGGCAGGTTTTGTAT	AACAAGGAGCAGTTGGCAGTT	International wheat genome sequencing consortium(IWGSC)
	TRAESCS6B02G017900	predicted protein	GTGTGAGACTGGAGGATGGC	GGATTCAGCTCAACTTTCACATAG	International wheat genome sequencing consortium(IWGSC)
	TRAESCS5D02G537600	aspartokinase 1, chloroplastic-like	ACTGGAGTCGACAACCCCTA	TAATCCATTGCTGCCCTCCC	International wheat genome sequencing consortium(IWGSC)
Reference	AB181991	Actin	GCCACACTGTTCCAATCTA	TGATGGAATTGTATGTCGC	NCBI_Genebank
