# Supplementary material for: Identification and transcriptomic profiling of salinity stress response genes in colored wheat mutant
Source: PeerJ. 2024 Mar 6;12:e17043. doi: 10.7717/peerj.17043 (PMC10924784; doi:10.7717/peerj.17043)
Supplement: Supplemental Information 5 [file peerj-12-17043-s005.xlsx]

## Sheet: Sheet1
Supplementary Table 2. Germination ratio the different salt concentrations on seed germination.
salt concentration(mM) wheat variety	Con	50	100	150	200	250	300	500
PL1	100	96	92	92	88	68	60	16
PL6	100	100	100	96	96	88	86	30
