# Supplementary material for: Identification and transcriptomic profiling of salinity stress response genes in colored wheat mutant
Source: PeerJ. 2024 Mar 6;12:e17043. doi: 10.7717/peerj.17043 (PMC10924784; doi:10.7717/peerj.17043)
Supplement: Supplemental Information 6 [file peerj-12-17043-s006.xlsx]

## Sheet: Sheet1
Supplementary Table 3. Summary of RNA-seq quality, read counts, and mapping rates.
	Total base	percentage of Q20 bases (%)	percentage of Q30 bases (%)	Number of reads	Mapped reads	mapping rate (%)
PL1_0h_Ref1	2149634945	98.854	96.2247	34549585	32948190	95.36
PL1_0h_Ref2	2.25936e+09	98.857	96.2243	36400278	34738891	95.44
PL1_3h_Ref1	2.18283e+09	98.7769	95.9901	39575181	37988654	95.99
PL1_3h_Ref2	2044834310	98.8693	96.2541	32662796	31114867	95.26
PL1_24h_Ref1	2.25254e+09	98.7086	95.8212	48259603	46675725	96.72
PL1_24h_Ref2	2.07087e+09	98.8096	96.0989	34259462	32655068	95.32
PL1_48h_Ref1	1822640285	98.787	96.053	34623662	33315578	96.22
PL1_48h_Ref2	1886212578	98.9624	96.5298	31806969	30419374	95.64
PL6_0h_Ref1	2502512279	97.849	94.7217	38238169	36827490	96.31
PL6_0h_Ref2	2518044441	98.7179	96.0532	48301671	46969112	97.24
PL6_3h_Ref1	2514370762	98.0913	95.0348	35779119	34349259	96
PL6_3h_Ref2	2121229427	97.9604	94.743	31646974	30434898	96.17
PL6_24h_Ref1	2145854658	97.9699	94.7688	33532640	32093686	95.71
PL6_24h_Ref2	2501416623	97.9398	94.7429	49022463	47706031	97.31
PL6_48h_Ref1	2281386822	97.9822	94.9264	42107809	40873874	97.07
PL6_48h_Ref2	2166102248	97.7623	94.3547	39115675	37854789	96.78
