# Supplementary material for: Identification and transcriptomic profiling of salinity stress response genes in colored wheat mutant
Source: PeerJ. 2024 Mar 6;12:e17043. doi: 10.7717/peerj.17043 (PMC10924784; doi:10.7717/peerj.17043)
Supplement: Supplemental Information 7 — This table contains the blastx results against the NCBI Poaceae family, which led to the identification of a total of 4,017 differentially expressed genes (DEGs) with a p-value ¡ 0.05 and FDR ¡ 0.05. [file peerj-12-17043-s007.xlsx]

## Sheet: Supplemenatry Table 4
Supplementary Table 4. Differentially expressed genes (DEGs) from Blastx results against NCBI Poaceae family. This table contains the blastx results against the NCBI Poaceae family, which led to the identification of a total of 4,017 differentially expressed genes (DEGs) with a p-value < 0.05 and FDR < 0.05
SeqName	Description	Length	#Hits	e-Value	sim mean
TraesCS1A02G009400	powdery mildew resistance protein Pm3	1360	20	0	75.7
TraesCS1A02G009900	putative disease resistance RPP13-like protein 3	844	20	0	82.63
TraesCS1A02G015900	G-type lectin S-receptor-like serine/threonine-protein kinase At2g19130	832	20	0	85.16
TraesCS1A02G024400	probable LRR receptor-like serine/threonine-protein kinase At3g47570	1058	20	0	68.89
TraesCS1A02G025600	Disease resistance protein RPM1	917	20	0	82.38
TraesCS1A02G026200	Disease resistance protein RPM1	409	20	0	77.74
TraesCS1A02G031300	protein NRT1/ PTR FAMILY 6.2	582	20	0	90.53
TraesCS1A02G033100	putative F-box/LRR-repeat protein 23	328	20	0	80.83
TraesCS1A02G040900	3-ketoacyl-CoA synthase 5-like	478	20	0	83.5
TraesCS1A02G043900	Laccase-25	577	20	0	87.78
TraesCS1A02G066800	isovaleryl-CoA dehydrogenase, mitochondrial	278	20	0	98.35
TraesCS1A02G066900	predicted protein	700	20	0	90.12
TraesCS1A02G070200	probable 2-oxoglutarate-dependent dioxygenase At5g05600	358	20	0	83.58
TraesCS1A02G070400	WRKY transcription factor	440	20	0	84.2
TraesCS1A02G071400	7-deoxyloganetin glucosyltransferase-like	505	20	0	83.11
TraesCS1A02G076900	protein LNK3 isoform X1	323	20	0	68.66
TraesCS1A02G080600	CBL-interacting protein kinase 17	466	20	0	90.22
TraesCS1A02G080700	CBL-interacting protein kinase 17	471	20	0	89.6
TraesCS1A02G083000	transcription factor APG	507	20	0	64.21
TraesCS1A02G083300	protein SOGA3	307	20	0	70.02
TraesCS1A02G089500	1-aminocyclopropane-1-carboxylate oxidase	308	20	0	92.09
TraesCS1A02G089600	1-aminocyclopropane-1-carboxylate oxidase	308	20	0	92.2
TraesCS1A02G093300	probable glucan 1,3-beta-glucosidase A	632	20	0	78.51
TraesCS1A02G095800	predicted protein	522	20	0	88.87
TraesCS1A02G101300	putative disease resistance protein RGA1	585	20	0	73.96
TraesCS1A02G108400	peroxidase	362	20	0	83.77
TraesCS1A02G113100	arabinogalactan peptide 16-like	71	20	6.27e-41	91.76
TraesCS1A02G115200	phosphoenolpyruvate/phosphate translocator 3, chloroplastic	407	20	0	87.12
TraesCS1A02G119300	cyanidin 3-O-rutinoside 5-O-glucosyltransferase-like	503	20	0	76.98
TraesCS1A02G119500	FK506-binding protein 5-like	309	20	0	76.19
TraesCS1A02G119800	predicted protein	395	20	0	71.06
TraesCS1A02G122500	NADP-dependent malic enzyme	570	20	0	95.67
TraesCS1A02G123100	predicted protein	70	14	3.83e-35	79.61
TraesCS1A02G125900	lachrymatory-factor synthase	176	20	2.6e-123	76.38
TraesCS1A02G131300	Calcium-binding endonuclease/exonuclease/phosphatase family	461	20	0	91.22
TraesCS1A02G134000	probable calcium-binding protein CML18	172	20	4.91e-120	89.97
TraesCS1A02G139900	heavy metal-associated isoprenylated plant protein 6	349	20	0	71.51
TraesCS1A02G145800	predicted protein	361	20	0	88.1
TraesCS1A02G152800	ribonuclease 1-like	245	20	0	80.07
TraesCS1A02G157900	senescence regulator	181	20	3.33e-124	67.14
TraesCS1A02G158600	predicted protein	281	20	4.64e-146	66.2
TraesCS1A02G159600	Cytokinin dehydrogenase 3	522	20	0	93.37
TraesCS1A02G159700	predicted protein	194	20	8.44e-135	71.28
TraesCS1A02G166200	predicted protein	231	20	1.79e-140	81.5
TraesCS1A02G166600	PR17c precursor	225	20	3.67e-161	90.51
TraesCS1A02G169300	RNA-binding protein	242	20	0	96.11
TraesCS1A02G174700	remorin-like	177	20	4.11e-118	80.17
TraesCS1A02G175500	low-temperature-induced 65 kDa protein	602	20	0	62.42
TraesCS1A02G178100	Zinc finger CCCH domain-containing protein 44	1659	20	0	74.13
TraesCS1A02G179400	protein RESPONSE TO LOW SULFUR 3	103	20	1.12e-60	87.63
TraesCS1A02G181000	methionine gamma-lyase	460	20	0	92.09
TraesCS1A02G183000	probable trehalase	592	20	0	85.59
TraesCS1A02G184900	protein SAR DEFICIENT 4	332	20	0	90.27
TraesCS1A02G186100	probable glutathione S-transferase GSTU6	233	20	8.8e-164	87.49
TraesCS1A02G186600	probable glutathione S-transferase GSTU6	235	20	1.72e-161	88.39
TraesCS1A02G186800	probable glutathione S-transferase GSTU6	230	20	3.31e-158	83.6
TraesCS1A02G203200	expansin-like A2	282	20	2.59e-167	82.81
TraesCS1A02G203600	Chitinase 8	252	20	0	95.56
TraesCS1A02G203700	Chitinase 8	256	20	0	95.78
TraesCS1A02G204200	DDB1- and CUL4-associated factor 8	488	20	0	89.03
TraesCS1A02G207600	predicted protein	308	20	0	85.18
TraesCS1A02G209100	Proline dehydrogenase 2, mitochondrial	267	20	0	90.99
TraesCS1A02G210400	probable trehalose-phosphate phosphatase 2	381	20	0	89.11
TraesCS1A02G211000	protein NRT1/ PTR FAMILY 6.3	595	20	0	92.06
TraesCS1A02G211500	putative glucuronosyltransferase PGSIP7	491	20	0	92.38
TraesCS1A02G212000	Beta-expansin 1a precursor, putative, expressed	270	20	0	89.09
TraesCS1A02G212700	transcription factor UNE10 isoform X1	454	20	0	77.29
TraesCS1A02G213600	haloacid dehalogenase-like hydrolase domain-containing protein Sgpp isoform X2	301	20	0	84.64
TraesCS1A02G215500	beta-amylase 3, chloroplastic	548	20	0	85.25
TraesCS1A02G215900	serine/threonine-protein kinase SAPK3	342	20	0	93.4
TraesCS1A02G218000	palmitoyl-protein thioesterase 1	315	20	0	89.82
TraesCS1A02G218100	Ethylene-responsive transcription factor 5	236	20	1.32e-125	61.01
TraesCS1A02G223300	probable tocopherol cyclase, chloroplastic	468	20	0	91.4
TraesCS1A02G228500	E3 ubiquitin-protein ligase EL5-like	187	20	3.85e-133	75.02
TraesCS1A02G234600	lichenase-2	334	20	0	95.33
TraesCS1A02G234800	cytokinin dehydrogenase 9	521	20	0	91.36
TraesCS1A02G235000	Eukaryotic peptide chain release factor subunit 1-2	443	20	0	92.43
TraesCS1A02G235100	Diacylglycerol kinase 1	721	20	0	88.65
TraesCS1A02G238700	putative nitronate monooxygenase	337	20	0	92.4
TraesCS1A02G242400	LEA protein	179	20	1.77e-98	75.39
TraesCS1A02G248700	CASP-like protein 1D1	189	20	5.84e-133	82.3
TraesCS1A02G249700	endo-1,3;1,4-beta-D-glucanase-like	241	20	3.08e-161	90.15
TraesCS1A02G250000	predicted protein	335	20	0	85.69
TraesCS1A02G253400	pyruvate, phosphate dikinase 2	939	20	0	93.12
TraesCS1A02G253900	cytochrome P450 734A1	546	20	0	87.2
TraesCS1A02G255100	gibberellin receptor GID1	355	20	0	94.37
TraesCS1A02G255400	predicted protein	469	20	0	93.96
TraesCS1A02G257400	protein NRT1/ PTR FAMILY 3.1	610	20	0	87.73
TraesCS1A02G259600	probably inactive leucine-rich repeat receptor-like protein kinase At5g48380	605	20	0	90.13
TraesCS1A02G261400	MLO-like protein 1	499	20	0	87.34
TraesCS1A02G263700	NAC domain-containing protein 48	293	20	0	82.67
TraesCS1A02G264900	F-box protein SKP2A	370	20	0	90.5
TraesCS1A02G265300	putative Bowman-Birk type wound-induced protease inhibitor	90	20	3.7e-61	79.65
TraesCS1A02G265600	predicted protein	89	20	3.05e-61	83.87
TraesCS1A02G265700	putative Bowman-Birk type wound-induced protease inhibitor	88	20	7.95e-58	79.05
TraesCS1A02G265800	putative Bowman-Birk type wound-induced protease inhibitor	90	20	3.2e-61	83.96
TraesCS1A02G265900	putative Bowman-Birk type wound-induced protease inhibitor	88	20	3.49e-58	81.14
TraesCS1A02G266000	Phospholipase A1-II 7	434	20	0	84.79
TraesCS1A02G275200	uncharacterized LOC100193052	276	20	0	89.89
TraesCS1A02G276800	Protein TRANSPARENT TESTA 1	379	20	0	71.42
TraesCS1A02G278600	Tetratricopeptide repeat (TPR)-like superfamily protein	470	20	0	76.46
TraesCS1A02G278800	uncharacterized acetyltransferase At3g50280	528	20	0	85.57
TraesCS1A02G280500	predicted protein	358	20	0	78.41
TraesCS1A02G280600	protein GUCD1	270	20	0	92.02
TraesCS1A02G280700	universal stress protein PHOS32	166	20	2.13e-118	90.48
TraesCS1A02G281000	predicted protein	146	20	3.35e-101	84.03
TraesCS1A02G284900	chitinase 2	289	20	0	84.47
TraesCS1A02G285000	probable mediator of RNA polymerase II transcription subunit 37c	648	20	0	97.61
TraesCS1A02G287000	predicted protein	86	20	2.28e-52	74.67
TraesCS1A02G291100	Nicotianamine aminotransferase A	459	20	0	93.14
TraesCS1A02G295300	Ammonium transporter 2 member 1	482	20	0	93.68
TraesCS1A02G295800	UPF0098 protein	165	20	6.74e-118	83.6
TraesCS1A02G298900	TOM1-like protein 6	635	20	0	81.36
TraesCS1A02G303600	protein LURP-one-related 8	206	20	9.59e-148	80.52
TraesCS1A02G305300	uncharacterized protein LOC109783518	102	20	2.12e-41	72.34
TraesCS1A02G306600	chlorophyll a-b binding protein of LHCII type 1-like	265	20	0	95.52
TraesCS1A02G307900	dentin sialophosphoprotein	842	20	0	61.51
TraesCS1A02G308900	SNF1-related protein kinase regulatory subunit beta-1	280	20	0	82.16
TraesCS1A02G312000	zeta-carotene desaturase, chloroplastic/chromoplastic	237	20	3.54e-126	77.27
TraesCS1A02G314500	predicted protein	191	20	1.79e-108	83.69
TraesCS1A02G314800	predicted protein	191	20	8.76e-107	83
TraesCS1A02G319300	scopoletin glucosyltransferase	474	20	0	82.68
TraesCS1A02G328500	GRF zinc finger family protein	168	20	4.37e-32	58.38
TraesCS1A02G329500	tyrosine decarboxylase 1	577	20	0	85.21
TraesCS1A02G332200	predicted protein	442	20	0	92.47
TraesCS1A02G334400	Gibberellin 2-beta-dioxygenase	343	20	0	88.98
TraesCS1A02G334700	Cytochrome P450 71A1	508	20	0	80.13
TraesCS1A02G334800	Cytochrome P450 71A1	512	20	0	80.21
TraesCS1A02G335100	O-methyltransferase ZRP4-like	373	20	0	80.77
TraesCS1A02G335200	O-methyltransferase ZRP4	362	20	0	82.28
TraesCS1A02G335800	O-methyltransferase ZRP4	366	20	0	83.73
TraesCS1A02G338400	non-symbiotic hemoglobin-like isoform X1	158	20	2.75e-109	91.82
TraesCS1A02G339300	alpha,alpha-trehalose-phosphate synthase [UDP-forming] 1	987	20	0	92.33
TraesCS1A02G340100	chaperone protein ClpB1	918	20	0	97.92
TraesCS1A02G349900	chaperone protein dnaJ C76, chloroplastic	349	20	0	83.99
TraesCS1A02G352100	protein SODIUM POTASSIUM ROOT DEFECTIVE 3	148	20	1.71e-92	73.9
TraesCS1A02G355300	pathogenesis-related protein 4	145	20	4.81e-102	85.64
TraesCS1A02G357700	putative lipid-binding protein At4g00165	125	12	5.07e-53	69.11
TraesCS1A02G358600	probable protein phosphatase 2C 50	380	20	0	87.03
TraesCS1A02G360400	probable ADP,ATP carrier protein At5g56450	317	20	0	88.6
TraesCS1A02G363800	catalytic/ hydrolase isoform X1	417	20	0	87.85
TraesCS1A02G364000	late embryogenesis abundant protein	224	20	1.36e-144	85.19
TraesCS1A02G364100	ABA-inducible protein PHV A1-like	163	20	1.21e-80	75.61
TraesCS1A02G369600	phosphomethylethanolamine N-methyltransferase-like	501	20	0	94.94
TraesCS1A02G372400	AFG1-like ATPase	339	20	0	93.33
TraesCS1A02G385900	---NA---	252
TraesCS1A02G387700	ARM repeat superfamily protein	527	20	0	87.73
TraesCS1A02G391800	receptor kinase-like protein Xa21 isoform X1	489	20	0	71.66
TraesCS1A02G394400	pinin-like isoform X1	529	20	0	80.06
TraesCS1A02G395100	cytochrome P450 71D7-like	513	20	0	85.71
TraesCS1A02G395200	protein DEHYDRATION-INDUCED 19	225	20	5.18e-165	84.44
TraesCS1A02G397100	protein N-lysine methyltransferase METTL21A	224	20	2.37e-159	91.53
TraesCS1A02G403300	predicted protein	266	20	0	98.03
TraesCS1A02G403800	predicted protein	266	20	0	96.99
TraesCS1A02G404500	Aspartic proteinase oryzasin-1	509	20	0	93.02
TraesCS1A02G407600	prolycopene isomerase 1, chloroplastic	585	20	0	93.81
TraesCS1A02G409800	G-box binding factor	283	20	0	83.34
TraesCS1A02G411100	ethylene-responsive transcription factor ERF061	285	20	0	76.75
TraesCS1A02G411600	CTP synthase family protein	604	20	0	91.96
TraesCS1A02G415200	protein CHUP1, chloroplastic	933	20	0	86.8
TraesCS1A02G420900	probable solanesyl-diphosphate synthase 3, chloroplastic	402	20	0	92.48
TraesCS1A02G422900	predicted protein	558	20	0	78.96
TraesCS1A02G423800	Late embryogenesis abundant protein Lea14-A	163	20	5.07e-118	90.26
TraesCS1A02G424000	anthocyanidin 5,3-O-glucosyltransferase-like	479	20	0	86.69
TraesCS1A02G424100	berberine bridge enzyme-like 18	510	20	0	79.71
TraesCS1A02G426700	RNA polymerase sigma factor sigE, chloroplastic/mitochondrial	494	20	0	82.14
TraesCS1A02G439300	uncharacterized protein LOC109782204	244	9	1.16e-75	68.69
TraesCS1A02G443900	UDP-glucose 4-epimerase 1	354	20	0	92.55
TraesCS1B02G000600	50S ribosomal protein L28, chloroplastic	133	19	3.07e-82	85.32
TraesCS1B02G000800	peroxisomal membrane protein PEX14-like isoform X2	477	20	0	84.97
TraesCS1B02G001100	predicted protein	127	20	1.76e-90	85.25
TraesCS1B02G001600	predicted protein	460	20	0	85.27
TraesCS1B02G001800	putative phospholipid-transporting ATPase 9	1267	20	0	85.19
TraesCS1B02G007900	E3 ubiquitin-protein ligase ORTHRUS 2	612	20	0	77.1
TraesCS1B02G008000	Protein MEI2-like 1	907	20	0	78.84
TraesCS1B02G018100	defensin	81	20	1.09e-38	84.72
TraesCS1B02G018200	arginine decarboxylase 2	610	20	0	80.36
TraesCS1B02G018900	ras-related protein Rab11C	223	20	2.37e-159	89.85
TraesCS1B02G019100	predicted protein	205	20	8.83e-151	93.48
TraesCS1B02G019200	tubulin-folding cofactor E	444	20	0	91.99
TraesCS1B02G021000	acetylserotonin O-methyltransferase 1-like	371	20	0	76.91
TraesCS1B02G021300	Phosphatidate cytidylyltransferase	317	20	0	94.98
TraesCS1B02G023000	putative disease resistance RPP13-like protein 3	920	20	0	72.15
TraesCS1B02G023200	tricin synthase 1	186	20	1.81e-30	80.61
TraesCS1B02G023600	anthocyanidin 3-O-glucosyltransferase	504	20	0	73.16
TraesCS1B02G023800	serine carboxypeptidase-like 10	465	20	0	75.78
TraesCS1B02G024500	actin-7	377	20	0	99.58
TraesCS1B02G029100	predicted protein	1189	20	0	74.91
TraesCS1B02G031100	pseudouridylate synthase/ transporter	508	20	0	86.08
TraesCS1B02G034100	subtilisin-chymotrypsin inhibitor CI-1B	74	20	1.79e-44	84.47
TraesCS1B02G035100	subtilisin-chymotrypsin inhibitor CI-1B	74	20	2.32e-45	84.72
TraesCS1B02G036500	CSC1-like protein At3g21620	764	20	0	90.83
TraesCS1B02G037100	NAD(P)-binding Rossmann-fold superfamily protein	300	20	0	91.03
TraesCS1B02G038700	protein NRT1/ PTR FAMILY 6.2	582	20	0	90.52
TraesCS1B02G041200	putative F-box/LRR-repeat protein 23	330	20	0	80.02
TraesCS1B02G043200	probable glucan 1,3-beta-glucosidase A	1075	20	0	79.13
TraesCS1B02G045700	mitochondrial ATP synthase 6 kDa subunit	59	20	2.34e-35	89.81
TraesCS1B02G048800	BRI1-KD interacting protein 130	258	20	8.64e-145	69.64
TraesCS1B02G048900	histone H2A	154	20	1.17e-99	92.72
TraesCS1B02G049100	histone H2A	155	20	1.04e-98	91.26
TraesCS1B02G049200	soluble inorganic pyrophosphatase 4	217	20	2.74e-157	92.56
TraesCS1B02G050200	E3 ubiquitin-protein ligase XB3	486	20	0	82.96
TraesCS1B02G050600	Lecithin-cholesterol acyltransferase-like 1	441	20	0	75.15
TraesCS1B02G051600	uncharacterized protein LOC109787361	466	20	0	62.52
TraesCS1B02G051700	protein MICRORCHIDIA 2-like isoform X1	567	20	0	91.19
TraesCS1B02G052400	protein HGH1 homolog	345	20	0	92.57
TraesCS1B02G053600	Glucose-6-phosphate isomerase, cytosolic	567	20	0	97.81
TraesCS1B02G053700	3-ketoacyl-CoA synthase 5	497	20	0	83.5
TraesCS1B02G055200	Myb-related protein MYBAS2	268	20	0	69.4
TraesCS1B02G056700	translation initiation factor IF-2 isoform X1	239	20	6.96e-174	78.99
TraesCS1B02G056900	Laccase-25	577	20	0	87.48
TraesCS1B02G057800	putative rubisco subunit binding-protein beta subunit	640	20	0	86.91
TraesCS1B02G057900	dihydroneopterin aldolase 1	135	20	2.32e-88	89.77
TraesCS1B02G059000	legumin-like protein	358	20	0	93.93
TraesCS1B02G059100	dehydroascorbate reductase	212	20	8.98e-156	95.77
TraesCS1B02G059800	nudix hydrolase 9	291	20	0	88.07
TraesCS1B02G060700	calcium-transporting ATPase 4, endoplasmic reticulum-type	1057	20	0	93.28
TraesCS1B02G060900	5'-methylthioadenosine/S-adenosylhomocysteine nucleosidase 2	269	20	0	89.22
TraesCS1B02G062400	predicted protein	321	20	0	75.8
TraesCS1B02G068200	prostaglandin E synthase 3	183	20	1.78e-120	85.37
TraesCS1B02G068500	uncharacterized protein LOC110436851 isoform X1	165	2	4.12e-06	67.12
TraesCS1B02G068700	unknow protein	58	20	2.36e-35	77.75
TraesCS1B02G069300	protein unc-13 homolog	1107	20	0	93.26
TraesCS1B02G071800	thylakoid membrane protein TERC, chloroplastic	377	20	0	84.39
TraesCS1B02G075200	glutamyl tRNA reductase	530	20	0	97.61
TraesCS1B02G077300	predicted protein	473	20	0	86.84
TraesCS1B02G079000	ribosome biogenesis regulatory protein homolog	330	20	0	89.24
TraesCS1B02G080400	predicted protein	479	20	0	90.07
TraesCS1B02G084600	hydroxyproline O-galactosyltransferase GALT3	591	20	0	83.91
TraesCS1B02G085100	isovaleryl-CoA dehydrogenase, mitochondrial	404	20	0	91.54
TraesCS1B02G087700	ADP-ribosylation factor-related protein 1	202	20	3.43e-143	91.21
TraesCS1B02G088600	probable 2-oxoglutarate-dependent dioxygenase At5g05600	358	20	0	84.11
TraesCS1B02G088700	DnaJ subfamily B member 13	347	20	0	77.59
TraesCS1B02G088900	WRKY transcription factor	455	20	0	81.77
TraesCS1B02G089900	predicted protein	521	20	0	82.78
TraesCS1B02G091900	cysteine-rich receptor-like protein kinase 2	668	20	0	87.77
TraesCS1B02G093600	long chain acyl-CoA synthetase 1	670	20	0	93.8
TraesCS1B02G093700	DUF724 domain-containing protein 3	444	20	0	77.11
TraesCS1B02G094300	triose phosphate/phosphate translocator TPT, chloroplastic	406	20	0	87.38
TraesCS1B02G094600	nitrogen regulatory protein P-II homolog	199	17	5.85e-137	82.01
TraesCS1B02G095000	protein LNK3 isoform X1	322	20	0	68.65
TraesCS1B02G095200	shaggy-related protein kinase alpha	393	20	0	93.79
TraesCS1B02G095600	probable protein phosphatase 2C 47	384	20	0	85.02
TraesCS1B02G095700	putative RNA polymerase II subunit B1 CTD phosphatase RPAP2 homolog	551	20	0	80.07
TraesCS1B02G095800	Peroxidase 2	340	20	0	89.71
TraesCS1B02G096200	peroxidase 5	338	20	0	85.36
TraesCS1B02G096700	predicted protein	433	20	0	81.61
TraesCS1B02G096900	Peroxidase 5	343	20	0	75.36
TraesCS1B02G097200	probable glutathione S-transferase GSTF1	219	20	2.34e-160	93.89
TraesCS1B02G097400	probable glutathione S-transferase GSTF1	219	20	1.3e-162	94.05
TraesCS1B02G097800	plant IF-like protein	374	20	0	80.61
TraesCS1B02G098200	zinc ion binding	857	20	0	84.53
TraesCS1B02G098600	CBL-interacting protein kinase 17	466	20	0	89.63
TraesCS1B02G098700	CBL-interacting protein kinase 17	466	20	0	89.58
TraesCS1B02G098800	acyl transferase 4	435	20	0	80.27
TraesCS1B02G099000	ABC transporter B family member 21	1275	20	0	92.78
TraesCS1B02G099100	diacylglycerol O-acyltransferase 3, cytosolic	403	17	0	74.51
TraesCS1B02G099600	Aspartic proteinase	498	20	0	92.6
TraesCS1B02G099800	1,4-dihydroxy-2-naphthoyl-CoA thioesterase 1	173	20	6.02e-108	84.21
TraesCS1B02G100100	hydrophobic protein LTI6B	55	20	2.19e-32	97.12
TraesCS1B02G100200	Chromatin structure-remodeling complex protein BSH	237	20	4.13e-175	93.54
TraesCS1B02G100400	transcription factor APG	502	20	0	64.93
TraesCS1B02G100700	protein SOGA3	269	20	2.04e-142	65.47
TraesCS1B02G100800	RNA-binding protein 8A	209	20	9.24e-152	85.74
TraesCS1B02G101000	predicted protein	303	20	0	69.12
TraesCS1B02G102200	replication protein A 70 kDa DNA-binding subunit C-like	881	20	0	73.55
TraesCS1B02G102600	Acyl-CoA N-acyltransferase (NAT) superfamily protein	276	20	0	84.99
TraesCS1B02G102700	Alanine aminotransferase 2	482	20	0	95.95
TraesCS1B02G104500	serine carboxypeptidase 2	470	20	0	86.66
TraesCS1B02G104800	uncharacterized protein LOC109739731	380	20	7.93e-157	64.42
TraesCS1B02G104900	mitogen-activated protein kinase 14	549	20	0	92.96
TraesCS1B02G105100	ribosome biogenesis protein NOP53	407	20	0	83.3
TraesCS1B02G105200	LEC14B protein	321	20	0	87.73
TraesCS1B02G105300	putative membrane-bound O-acyltransferase C24H6.01c	522	20	0	90.16
TraesCS1B02G107100	probable E3 ubiquitin-protein ligase XBOS34	514	20	0	83.98
TraesCS1B02G108800	pentatricopeptide repeat-containing protein At4g35850, mitochondrial	452	20	0	87.01
TraesCS1B02G110600	cysteine-rich receptor-like protein kinase 6	465	20	0	78.87
TraesCS1B02G110800	predicted protein	138	20	2.85e-70	78.81
TraesCS1B02G111100	F-box protein SKIP19-like	116	3	3.49e-13	65.53
TraesCS1B02G112300	uncharacterized protein LOC109770699	104	15	5.29e-69	94.25
TraesCS1B02G112700	Na+/H+ antiporter	546	20	0	94.55
TraesCS1B02G113300	probable 4-hydroxy-tetrahydrodipicolinate reductase 1, chloroplastic	222	20	2.62e-154	88.77
TraesCS1B02G113400	asparagine--tRNA ligase, cytoplasmic 1	566	20	0	92.73
TraesCS1B02G113700	glutathione S-transferase 4	223	20	9.41e-162	86.36
TraesCS1B02G115900	peroxidase A2-like	342	20	0	82.95
TraesCS1B02G116700	actin cytoskeleton-regulatory complex protein PAN1 isoform X2	1041	20	0	69
TraesCS1B02G117200	predicted protein	378	20	0	82.64
TraesCS1B02G117400	1-aminocyclopropane-1-carboxylate oxidase	308	20	0	92.37
TraesCS1B02G117500	1-aminocyclopropane-1-carboxylate oxidase	308	20	0	92.48
TraesCS1B02G118900	probable chromatin-remodeling complex ATPase chain	1103	20	0	94.79
TraesCS1B02G119000	Double-stranded RNA-binding protein 2	578	20	0	75.47
TraesCS1B02G119300	starch synthase IIIa	1183	20	0	73.08
TraesCS1B02G120000	thaumatin-like protein	267	20	1.04e-177	75.94
TraesCS1B02G120700	Os01g0358551	119	8	2.99e-40	79.43
TraesCS1B02G121600	probable glucan 1,3-beta-glucosidase A	603	20	0	75.85
TraesCS1B02G123200	kinesin-like protein KIN-13A	519	20	0	92.31
TraesCS1B02G124100	USP family protein	197	20	4.2e-96	93
TraesCS1B02G125400	mpv17 / PMP22 family protein	340	20	0	85.11
TraesCS1B02G126100	protein disulfide isomerase-like 2-1	367	20	0	92.84
TraesCS1B02G126700	nifU-like protein 4, mitochondrial	268	20	0	90.11
TraesCS1B02G126900	NAD(P)H-quinone oxidoreductase subunit S, chloroplastic	239	18	6.39e-167	82.95
TraesCS1B02G127000	probable ethylene response sensor 2	638	20	0	91.32
TraesCS1B02G127500	Glyoxysomal fatty acid beta-oxidation multifunctional protein MFP-a	728	20	0	86.3
TraesCS1B02G127900	leucine aminopeptidase 2, chloroplastic	529	20	0	90.29
TraesCS1B02G128400	Golgi apparatus membrane protein-like protein ECHIDNA	186	20	1.77e-132	94.12
TraesCS1B02G128500	GDSL esterase/lipase At1g09390	436	20	0	81.59
TraesCS1B02G129600	probable E3 ubiquitin-protein ligase HIP1	499	20	0	75.1
TraesCS1B02G130200	serine/arginine-rich splicing factor RS2Z32	198	20	2.16e-138	90.78
TraesCS1B02G130500	calponin homology domain-containing protein DDB_G0272472	662	20	0	87.63
TraesCS1B02G130800	probable GTP diphosphokinase CRSH1, chloroplastic	584	20	0	89.95
TraesCS1B02G132100	5-amino-6-(5-phospho-D-ribitylamino)uracil phosphatase, chloroplastic	356	20	0	93.8
TraesCS1B02G132200	putative FBD-associated F-box protein At1g61330	405	20	0	75.49
TraesCS1B02G133100	DNA-directed RNA polymerases II, IV and V subunit 11	119	20	2.03e-86	96.77
TraesCS1B02G133200	arabinogalactan peptide 16-like	71	20	1.56e-41	91.1
TraesCS1B02G133400	glycerophosphodiester phosphodiesterase GDPD6	386	20	0	88.93
TraesCS1B02G134000	pollen-specific leucine-rich repeat extensin-like protein 2	578	20	0	79.42
TraesCS1B02G134900	Protein apaG	294	20	0	82.38
TraesCS1B02G135100	phosphoenolpyruvate/phosphate translocator 3, chloroplastic	410	20	0	86.55
TraesCS1B02G135700	lactoylglutathione lyase	169	20	3.38e-120	86.48
TraesCS1B02G135800	metallothionein-like protein 1	75	20	1.04e-45	76.79
TraesCS1B02G135900	probable GTP-binding protein OBGM, mitochondrial	511	20	0	84.57
TraesCS1B02G136700	protein EARLY RESPONSIVE TO DEHYDRATION 15	120	20	8.94e-55	78.81
TraesCS1B02G137200	predicted protein	111	20	3.55e-63	81.26
TraesCS1B02G138100	auxin-responsive protein IAA15	198	20	1.57e-143	81.71
TraesCS1B02G139100	MAR-binding filament-like protein 1	741	20	0	79.73
TraesCS1B02G139500	heat shock 70 kDa protein 15	762	20	0	90.75
TraesCS1B02G139600	heat shock 70 kDa protein 15-like	842	20	0	92.85
TraesCS1B02G140800	uncharacterized protein LOC109755162 isoform X2	362	20	0	80.68
TraesCS1B02G140900	Putative AGC protein kinase family protein	525	20	0	91.6
TraesCS1B02G141200	Lactoylglutathione lyase / glyoxalase I family protein	186	20	6.33e-138	89.1
TraesCS1B02G141400	actin binding protein family	625	20	0	79.88
TraesCS1B02G141700	NADP-dependent malic enzyme	454	20	0	96.26
TraesCS1B02G142200	derlin-1	244	20	2.25e-168	89.93
TraesCS1B02G142400	mitochondrial dicarboxylate/tricarboxylate transporter DTC	302	20	0	95.31
TraesCS1B02G143800	Calmodulin binding protein	560	20	0	81.01
TraesCS1B02G144300	60S ribosomal protein L11	168	20	4.04e-122	98.65
TraesCS1B02G144500	zinc transporter 7	386	20	0	89.34
TraesCS1B02G145300	GDSL esterase/lipase At5g45910-like	371	20	0	94.54
TraesCS1B02G145500	mannosyl-oligosaccharide 1,2-alpha-mannosidase MNS3	615	20	0	93.62
TraesCS1B02G145800	abscisic acid receptor PYL8	205	20	1.42e-149	92.57
TraesCS1B02G146100	40S ribosomal protein S7	192	20	3.39e-137	97.29
TraesCS1B02G146500	transcription factor bHLH68	395	20	0	87.26
TraesCS1B02G146600	U1 small nuclear ribonucleoprotein 70 kDa	358	20	0	87.55
TraesCS1B02G148000	probable calcium-binding protein CML18	172	20	1.79e-119	89.29
TraesCS1B02G148100	predicted protein	267	20	0	78.9
TraesCS1B02G149000	INO80 complex subunit D	288	20	0	82.89
TraesCS1B02G149800	UTP:RNA uridylyltransferase 1	854	20	0	77.75
TraesCS1B02G150000	putative zinc transporter At3g08650	577	20	0	91.49
TraesCS1B02G150100	pentatricopeptide repeat-containing protein MRL1, chloroplastic isoform X1	1150	20	0	73.11
TraesCS1B02G150200	probable lactoylglutathione lyase, chloroplastic	339	20	0	92.12
TraesCS1B02G157000	heavy metal-associated isoprenylated plant protein 3	346	20	0	73.07
TraesCS1B02G158000	chitinase 2-like	314	20	0	86.58
TraesCS1B02G164000	predicted protein	361	20	0	87.88
TraesCS1B02G169500	3-ketoacyl-CoA synthase 12	463	20	0	89.4
TraesCS1B02G170200	ribonuclease 1-like	245	20	0	79.74
TraesCS1B02G171300	leucine-rich repeat extensin-like protein 5	384	20	0	52.67
TraesCS1B02G173200	probable cytokinin riboside 5'-monophosphate phosphoribohydrolase LOGL10	132	20	6.49e-93	95.38
TraesCS1B02G174100	senescence regulator	181	20	1.26e-121	66.6
TraesCS1B02G174600	predicted protein	246	20	5.13e-139	65.24
TraesCS1B02G182400	protein TIC110, chloroplastic	446	20	0	80.45
TraesCS1B02G186600	bifunctional epoxide hydrolase 2	311	20	0	90.37
TraesCS1B02G194900	Glutathione S-transferase U17	237	20	8.86e-160	81.79
TraesCS1B02G195500	lysM domain containing protein	116	20	1.49e-54	77.13
TraesCS1B02G199600	methionine gamma-lyase	460	20	0	91.82
TraesCS1B02G200100	fringe-related protein	508	20	0	89.75
TraesCS1B02G201100	protein RESPONSE TO LOW SULFUR 3	102	20	7.02e-60	88.13
TraesCS1B02G204100	monocopper oxidase-like protein SKU5	595	20	0	90.22
TraesCS1B02G209200	TPR domain protein	237	20	1.82e-162	70.02
TraesCS1B02G211100	plastidal glycolate/glycerate translocator 1, chloroplastic	531	20	0	85.95
TraesCS1B02G214700	protein CURVATURE THYLAKOID 1B, chloroplastic	168	20	8.94e-118	87.77
TraesCS1B02G217200	expansin-like A2	275	20	0	82.85
TraesCS1B02G223300	proline dehydrogenase 2, mitochondrial	480	20	0	87.92
TraesCS1B02G224300	probable trehalose-phosphate phosphatase 2	438	20	0	88.81
TraesCS1B02G225000	protein NRT1/ PTR FAMILY 6.3	595	20	0	91.95
TraesCS1B02G225700	Beta-expansin 1a precursor, putative, expressed	270	20	0	87.33
TraesCS1B02G226100	Expansin-B4	276	20	0	91.13
TraesCS1B02G226500	pyruvate kinase isozyme G, chloroplastic	564	20	0	91.74
TraesCS1B02G227100	haloacid dehalogenase-like hydrolase domain-containing protein Sgpp isoform X2	301	20	0	84.75
TraesCS1B02G229000	beta-amylase 3, chloroplastic	548	20	0	85.61
TraesCS1B02G229400	serine/threonine-protein kinase SAPK3	342	20	0	93.35
TraesCS1B02G229500	trihelix transcription factor ASIL1	317	20	0	86.76
TraesCS1B02G231900	ABC transporter E family member 2	599	20	0	93.6
TraesCS1B02G234300	D-3-phosphoglycerate dehydrogenase 3, chloroplastic-like	582	20	0	86.8
TraesCS1B02G236600	probable tocopherol cyclase, chloroplastic	467	20	0	91.62
TraesCS1B02G242700	E3 ubiquitin-protein ligase EL5-like	186	20	7.53e-128	74.63
TraesCS1B02G248300	Diacylglycerol kinase 1	434	20	0	86.74
TraesCS1B02G248600	Eukaryotic peptide chain release factor subunit 1-2	440	20	0	93.95
TraesCS1B02G249000	lichenase-2	334	20	0	95.33
TraesCS1B02G257700	isoamylase 2, chloroplastic	788	20	0	86.94
TraesCS1B02G263100	basic 7S globulin	435	20	0	87
TraesCS1B02G264900	pyruvate, phosphate dikinase 2	939	20	0	93.21
TraesCS1B02G265900	gibberellin receptor GID1	355	20	0	94.35
TraesCS1B02G266200	predicted protein	467	20	0	94.04
TraesCS1B02G267900	protein NRT1/ PTR FAMILY 3.1	607	20	0	88.06
TraesCS1B02G268000	probable carboxylesterase 15	356	20	0	89.36
TraesCS1B02G274300	NAC domain-containing protein 48	301	20	0	83.69
TraesCS1B02G276200	putative Bowman-Birk type wound-induced protease inhibitor	90	20	2.37e-59	84.02
TraesCS1B02G276500	predicted protein	89	20	9.24e-61	83.87
TraesCS1B02G276700	putative Bowman-Birk type wound-induced protease inhibitor	88	20	2.8e-58	80.37
TraesCS1B02G276800	putative Bowman-Birk type wound-induced protease inhibitor	90	20	1.38e-61	83.96
TraesCS1B02G276900	putative Bowman-Birk type wound-induced protease inhibitor	88	20	2.82e-59	81.24
TraesCS1B02G281200	predicted protein	271	20	1.64e-131	67.05
TraesCS1B02G287500	predicted protein	479	20	0	77.81
TraesCS1B02G287800	uncharacterized acetyltransferase At3g50280	527	20	0	85.36
TraesCS1B02G288800	O-fucosyltransferase 19	604	20	0	87.36
TraesCS1B02G290000	predicted protein	146	20	1.28e-86	83.37
TraesCS1B02G291700	predicted protein	81	20	4.37e-50	71.27
TraesCS1B02G294300	probable mediator of RNA polymerase II transcription subunit 37c	648	20	0	97.69
TraesCS1B02G296400	predicted protein	86	20	2.18e-55	74.8
TraesCS1B02G300500	Nicotianamine aminotransferase A	495	20	0	92.34
TraesCS1B02G304800	UPF0098 protein	167	20	1.44e-112	83.06
TraesCS1B02G310300	expansin-A4	251	20	0	94.21
TraesCS1B02G314000	protein LURP-one-related 8	208	20	1.65e-148	80.68
TraesCS1B02G316000	uncharacterized protein LOC109783518	102	20	2.33e-40	73.41
TraesCS1B02G317500	chlorophyll a-b binding protein of LHCII type 1-like	153	20	1.3e-90	97.74
TraesCS1B02G326800	predicted protein	192	20	3.02e-107	84.75
TraesCS1B02G326900	predicted protein	191	20	2.96e-113	84.23
TraesCS1B02G345800	predicted protein	441	20	0	92.03
TraesCS1B02G347200	tubby-like F-box protein 9	373	20	0	87.46
TraesCS1B02G347600	Gibberellin 2-beta-dioxygenase	340	20	0	88.06
TraesCS1B02G347700	Cytochrome P450 71A1	508	20	0	80.14
TraesCS1B02G348000	O-methyltransferase ZRP4-like	373	20	0	80.72
TraesCS1B02G348900	acetylserotonin O-methyltransferase 1-like	285	20	0	84.8
TraesCS1B02G349100	O-methyltransferase ZRP4	357	20	0	85.75
TraesCS1B02G350700	gamma-glutamyl hydrolase 2	337	20	0	91.6
TraesCS1B02G352400	chaperone protein ClpB1	917	20	0	98.17
TraesCS1B02G353900	uncharacterized protein LOC109741071	291	20	1.98e-157	65.46
TraesCS1B02G364200	chaperone protein dnaJ C76, chloroplastic	348	20	0	83.31
TraesCS1B02G366500	putative disease resistance RPP13-like protein 3	911	20	0	75.83
TraesCS1B02G367800	Phospholipase A1-II 7	434	20	0	69.49
TraesCS1B02G372400	putative receptor protein kinase ZmPK1	804	20	0	84.34
TraesCS1B02G374500	putative aldehyde dehydrogenase MIS1	551	20	0	95.5
TraesCS1B02G375000	myosin-11 isoform X2	2014	20	0	88.66
TraesCS1B02G375100	probable protein phosphatase 2C 50	381	20	0	86.86
TraesCS1B02G379300	neurofilament heavy polypeptide-like	386	20	0	64.37
TraesCS1B02G381000	catalytic/ hydrolase isoform X1	377	20	0	85.02
TraesCS1B02G381200	predicted protein	212	20	2.41e-137	79.26
TraesCS1B02G381400	group3 late embryogenesis abundant protein	178	20	2.21e-115	87.18
TraesCS1B02G381500	group3 late embryogenesis abundant protein	169	20	4.23e-113	84.67
TraesCS1B02G385300	mitogen-activated protein kinase kinase kinase NPK1-like	439	20	0	77.4
TraesCS1B02G388200	predicted protein	265	20	0	97.71
TraesCS1B02G388300	predicted protein	265	20	0	96.88
TraesCS1B02G388400	hypothetical protein C2845_PM03G05550	209	5	2.54e-51	61.72
TraesCS1B02G388700	phosphomethylethanolamine N-methyltransferase-like	498	20	0	93.7
TraesCS1B02G394700	non-specific lipid-transfer protein 2-like	97	20	5.19e-58	88.12
TraesCS1B02G395400	carbohydrate transporter/ sugar porter/ transporter	482	20	0	88.31
TraesCS1B02G398600	myrosinase-binding protein 2-like	313	20	1.37e-177	67.47
TraesCS1B02G401400	NADPH-dependent aldehyde reductase-like protein, chloroplastic	270	20	5.95e-160	89.3
TraesCS1B02G404000	CDP-diacylglycerol--serine O-phosphatidyltransferase 2	395	20	0	94.45
TraesCS1B02G410400	CASP-like protein 1U2	172	20	3.46e-71	69.33
TraesCS1B02G410800	2-oxoglutarate (2OG) and Fe(II)-dependent oxygenase superfamily protein	348	20	0	77.37
TraesCS1B02G415600	probable disease resistance protein At1g61180	910	20	0	59.17
TraesCS1B02G417000	uncharacterized oxidoreductase At4g09670	371	20	0	89.06
TraesCS1B02G420000	pirin-like protein	360	20	0	81.16
TraesCS1B02G422400	Hydroxyproline-rich glycoprotein family protein	528	20	0	78.33
TraesCS1B02G423500	protein DEHYDRATION-INDUCED 19	227	20	4.34e-162	82.58
TraesCS1B02G432500	predicted protein	69	20	1.85e-42	84.57
TraesCS1B02G432700	predicted protein	266	20	0	98.03
TraesCS1B02G433300	predicted protein	266	20	0	98.03
TraesCS1B02G434100	Subtilisin-like protease	777	20	0	77.46
TraesCS1B02G439800	G-box binding factor	283	20	0	81.9
TraesCS1B02G441300	ethylene-responsive transcription factor ERF061	282	20	0	77
TraesCS1B02G441900	CTP synthase family protein	599	20	0	92.36
TraesCS1B02G452100	probable solanesyl-diphosphate synthase 3, chloroplastic	402	20	0	92.35
TraesCS1B02G456900	berberine bridge enzyme-like 18	498	20	0	78.58
TraesCS1B02G461600	RNA polymerase sigma factor sigE, chloroplastic/mitochondrial	492	20	0	82.22
TraesCS1B02G468400	mannose/glucose-specific lectin	148	20	4.33e-23	54.55
TraesCS1B02G469800	berberine bridge enzyme-like 18	538	20	0	85.49
TraesCS1B02G474500	uncharacterized protein LOC109782183	158	20	1.64e-43	59.09
TraesCS1B02G478400	UDP-glucose 4-epimerase 1	354	20	0	92.67
TraesCS1D02G002900	probable leucine-rich repeat receptor-like protein kinase At1g35710	1174	20	0	75.9
TraesCS1D02G004600	cytochrome P450 72A14	532	20	0	89.39
TraesCS1D02G009300	powdery mildew resistance protein PM3 variant	484	20	0	85.25
TraesCS1D02G012000	defensin	82	20	2.33e-56	86.43
TraesCS1D02G015400	rust resistance kinase Lr10 isoform X2	692	20	0	86.62
TraesCS1D02G019000	tricin synthase 1	248	20	1.75e-180	79.05
TraesCS1D02G019200	anthocyanidin 3-O-glucosyltransferase	499	20	0	74.71
TraesCS1D02G020600	Bowman-Birk type trypsin inhibitor	89	20	6.97e-45	70.14
TraesCS1D02G024500	probable LRR receptor-like serine/threonine-protein kinase At3g47570	328	20	0	68.13
TraesCS1D02G027900	subtilisin-chymotrypsin inhibitor CI-1B	74	20	3.48e-46	86.49
TraesCS1D02G029500	CSC1-like protein At3g21620	764	20	0	90.76
TraesCS1D02G034100	putative F-box/LRR-repeat protein 23	328	20	0	80.8
TraesCS1D02G034800	metallothionein-like protein 2C	80	19	3.71e-46	80.33
TraesCS1D02G040500	polygalacturonase 1 beta-like protein 3 isoform X3	518	20	0	64.62
TraesCS1D02G042100	3-ketoacyl-CoA synthase 12	463	20	0	87.34
TraesCS1D02G044300	Laccase-25	577	20	0	87.55
TraesCS1D02G045000	protein ACCELERATED CELL DEATH 6-like	683	20	0	64.57
TraesCS1D02G047600	E3 UFM1-protein ligase 1 homolog	272	20	0	90.84
TraesCS1D02G057200	F-box protein SKIP1	299	20	0	88.16
TraesCS1D02G062800	predicted protein	482	20	0	89.36
TraesCS1D02G067700	probable serine/threonine-protein kinase PBL25	448	20	0	83.48
TraesCS1D02G067800	isovaleryl-CoA dehydrogenase, mitochondrial	408	20	0	94.14
TraesCS1D02G067900	predicted protein	718	20	0	88.47
TraesCS1D02G072900	WRKY transcription factor	464	20	0	83.68
TraesCS1D02G076200	cysteine-rich receptor-like protein kinase 2	670	20	0	87.15
TraesCS1D02G079100	protein LNK3 isoform X1	244	20	0	70.6
TraesCS1D02G080300	peroxidase 5	340	20	0	84.94
TraesCS1D02G082500	CBL-interacting protein kinase 17	480	20	0	87.23
TraesCS1D02G082600	CBL-interacting protein kinase 17	448	20	0	86.72
TraesCS1D02G084200	transcription factor APG	502	20	0	64.91
TraesCS1D02G084500	protein SOGA3	307	20	0	69.03
TraesCS1D02G089900	tryptamine hydroxycinnamoyltransferase 2	438	20	0	88.73
TraesCS1D02G090800	GDSL esterase/lipase At1g28600-like	378	20	0	79.01
TraesCS1D02G098100	1-aminocyclopropane-1-carboxylate oxidase	308	20	0	92.27
TraesCS1D02G100100	starch synthase IIIa	1611	20	0	80.07
TraesCS1D02G111600	fasciclin-like arabinogalactan protein 11	263	20	0	83.45
TraesCS1D02G114000	thioredoxin H4-2	131	20	1.07e-94	96.03
TraesCS1D02G114500	arabinogalactan peptide 16-like	71	20	3.9e-42	91.72
TraesCS1D02G114700	glycerophosphodiester phosphodiesterase GDPD6	382	20	0	89.9
TraesCS1D02G116600	phosphoenolpyruvate/phosphate translocator 3, chloroplastic	404	20	0	87.21
TraesCS1D02G118000	predicted protein	114	20	1.73e-76	79.09
TraesCS1D02G118300	Histone-lysine N-methyltransferase, H3 lysine-9 specific SUVH5	1224	20	0	66.83
TraesCS1D02G118600	Boron transporter 4	751	20	0	88.5
TraesCS1D02G120500	leucine-rich repeat extensin-like protein 4	413	20	0	89.74
TraesCS1D02G125800	probable calcium-binding protein CML18	172	20	8.65e-122	89.54
TraesCS1D02G127400	GDSL esterase/lipase At5g45910-like	315	20	0	95.83
TraesCS1D02G130300	PRA1 family protein F3	191	20	5.52e-134	84.31
TraesCS1D02G139400	Heavy metal-associated isoprenylated plant protein 6	348	20	0	73.12
TraesCS1D02G142100	E3 ubiquitin-protein ligase MIEL1-like	254	20	0	87.07
TraesCS1D02G144400	predicted protein	361	20	0	87.79
TraesCS1D02G147000	acyltransferase-like protein At1g54570, chloroplastic	689	20	0	86.34
TraesCS1D02G147900	protein ECERIFERUM 1	634	20	0	90.91
TraesCS1D02G148900	3-ketoacyl-CoA synthase 12	463	20	0	88.99
TraesCS1D02G149700	putative RNase S-like protein precursor	252	20	0	79.18
TraesCS1D02G149800	ribonuclease 1-like	245	20	0	79.96
TraesCS1D02G151900	serine/threonine-protein kinase tricorner	564	20	0	91.84
TraesCS1D02G155400	senescence regulator	181	20	1.27e-125	66.98
TraesCS1D02G155900	predicted protein	246	20	9.92e-179	66.11
TraesCS1D02G159400	vacuolar protein sorting-associated protein 52 A-like isoform X1	689	20	0	93.47
TraesCS1D02G163800	low-temperature-induced 65 kDa protein	599	20	0	62.13
TraesCS1D02G164300	remorin-like	177	20	1.14e-117	80.21
TraesCS1D02G167300	RNA-binding protein	242	20	0	96.11
TraesCS1D02G175000	protein TIC110, chloroplastic	282	20	0	85.23
TraesCS1D02G176600	zinc finger CCCH domain-containing protein 19-like	1657	20	0	71.83
TraesCS1D02G177700	protein RESPONSE TO LOW SULFUR 3	105	20	9.36e-64	87.84
TraesCS1D02G177800	probable plastid-lipid-associated protein 10, chloroplastic	279	20	0	88.6
TraesCS1D02G178600	fringe-related protein	508	20	0	89.9
TraesCS1D02G184500	methionine gamma-lyase	460	20	0	92.04
TraesCS1D02G188500	predicted protein	407	20	0	87.59
TraesCS1D02G190000	predicted protein	236	20	1.68e-171	86.51
TraesCS1D02G191100	probable glutathione S-transferase GSTU6	233	20	2.35e-168	88.2
TraesCS1D02G195300	abscisic acid receptor PYR1	213	20	9.32e-153	91.28
TraesCS1D02G199300	predicted protein	315	20	0	81.21
TraesCS1D02G200000	plastidal glycolate/glycerate translocator 1, chloroplastic	509	20	0	81.79
TraesCS1D02G206000	predicted protein	138	20	1.27e-69	72.69
TraesCS1D02G206700	expansin-like A2	283	20	0	80.76
TraesCS1D02G207000	chitinase 8	286	20	1.08e-179	83.68
TraesCS1D02G207100	Chitinase 8	256	20	0	95.61
TraesCS1D02G212400	proline dehydrogenase 2, mitochondrial	481	20	0	87.53
TraesCS1D02G213700	probable trehalose-phosphate phosphatase 2	381	20	0	89.06
TraesCS1D02G215600	transcription factor UNE10 isoform X2	455	20	0	77.27
TraesCS1D02G216400	haloacid dehalogenase-like hydrolase domain-containing protein Sgpp isoform X2	302	20	0	83.19
TraesCS1D02G218000	beta-amylase 3, chloroplastic	546	20	0	85.7
TraesCS1D02G218200	serine/threonine-protein kinase SAPK3	342	20	0	93.21
TraesCS1D02G218500	trihelix transcription factor ASIL1	319	20	0	87.39
TraesCS1D02G219700	palmitoyl-protein thioesterase 1	293	20	0	85.91
TraesCS1D02G221800	transcription factor GHD7	289	20	0	68.69
TraesCS1D02G224900	probable tocopherol cyclase, chloroplastic	467	20	0	91.56
TraesCS1D02G236300	RNA-binding protein BRN1	460	20	0	90.7
TraesCS1D02G237100	Eukaryotic peptide chain release factor subunit 1-2	441	20	0	93.85
TraesCS1D02G237500	lichenase-2	334	20	0	95.33
TraesCS1D02G242300	LEA protein	183	20	9.23e-100	75.21
TraesCS1D02G243000	probable folate-biopterin transporter 7	437	20	0	87.82
TraesCS1D02G248200	CASP-like protein 1D1	189	20	5.11e-134	81.76
TraesCS1D02G252900	pyruvate, phosphate dikinase 2	939	20	0	93.15
TraesCS1D02G254500	gibberellin receptor GID1	354	20	0	94.34
TraesCS1D02G256700	protein NRT1/ PTR FAMILY 3.1	608	20	0	88.35
TraesCS1D02G256800	probable carboxylesterase 15	356	20	0	89.52
TraesCS1D02G259400	probably inactive leucine-rich repeat receptor-like protein kinase At5g48380	604	20	0	90.13
TraesCS1D02G261400	MLO-like protein 1	499	20	0	87.29
TraesCS1D02G263800	NAC domain-containing protein 48	300	20	0	84.46
TraesCS1D02G264700	Amino acid permease 3	490	20	0	94.14
TraesCS1D02G265600	putative Bowman-Birk type wound-induced protease inhibitor	90	20	4.55e-61	77.03
TraesCS1D02G265800	predicted protein	89	20	1.78e-61	83.87
TraesCS1D02G265900	putative Bowman-Birk type wound-induced protease inhibitor	88	20	3.15e-59	80.89
TraesCS1D02G266000	putative Bowman-Birk type wound-induced protease inhibitor	90	20	1.38e-61	83.96
TraesCS1D02G266100	putative Bowman-Birk type wound-induced protease inhibitor	88	20	1.86e-59	80.89
TraesCS1D02G266300	Phospholipase A1-II 7	433	20	0	85.57
TraesCS1D02G267100	PB1 domain containing protein	366	20	0	72.81
TraesCS1D02G269000	alpha/beta-Hydrolases superfamily protein	367	20	0	87.38
TraesCS1D02G271100	predicted protein	268	20	4.07e-131	67.04
TraesCS1D02G272900	subtilisin-like protease SBT1.9	745	20	0	87.64
TraesCS1D02G274000	fructose-1,6-bisphosphatase, cytosolic	341	20	0	95.86
TraesCS1D02G276400	solute carrier family 35 member F2-like	407	20	0	88.37
TraesCS1D02G277900	Tetratricopeptide repeat (TPR)-like superfamily protein	474	20	0	77.98
TraesCS1D02G278100	uncharacterized acetyltransferase At3g50280	571	20	0	85.29
TraesCS1D02G279600	predicted protein	358	20	0	78.79
TraesCS1D02G280200	predicted protein	147	20	2.91e-104	83.81
TraesCS1D02G280600	transcription factor ILR3	241	20	4.21e-176	81.06
TraesCS1D02G280700	delta-1-pyrroline-5-carboxylate synthase	716	20	0	97.68
TraesCS1D02G283900	chitinase 2	289	20	0	84.87
TraesCS1D02G284000	probable mediator of RNA polymerase II transcription subunit 37c	614	20	0	92.86
TraesCS1D02G285900	predicted protein	88	20	1.86e-59	74.23
TraesCS1D02G286700	histone H4	103	20	6.65e-70	99.76
TraesCS1D02G289700	Nicotianamine aminotransferase A	496	20	0	93.03
TraesCS1D02G295700	uncharacterized protein LOC109752173 isoform X1	431	20	0	49.34
TraesCS1D02G296500	UPF0098 protein	165	20	2.59e-118	83.6
TraesCS1D02G296600	ammonium transporter 2 member 1	482	20	0	93.69
TraesCS1D02G299700	expansin-A4	250	20	0	94.33
TraesCS1D02G303100	protein LURP-one-related 8	209	20	4.1e-152	80.79
TraesCS1D02G305000	uncharacterized protein LOC109783518	101	20	4.54e-64	75.32
TraesCS1D02G306200	chlorophyll a-b binding protein of LHCII type 1-like	263	20	0	95.02
TraesCS1D02G308200	SNF1-related protein kinase regulatory subunit beta-1	280	20	0	82.88
TraesCS1D02G312600	probable glycerol-3-phosphate dehydrogenase [NAD(+)] 3, cytosolic	461	20	0	94.09
TraesCS1D02G315200	predicted protein	191	20	1.83e-131	83.37
TraesCS1D02G330500	poly [ADP-ribose] polymerase 3	824	20	0	91.79
TraesCS1D02G334800	predicted protein	441	20	0	92.65
TraesCS1D02G336900	Gibberellin 2-beta-dioxygenase	343	20	0	88.36
TraesCS1D02G337500	O-methyltransferase ZRP4-like	380	20	0	75.98
TraesCS1D02G337900	acetylserotonin O-methyltransferase 1-like	373	20	0	84.42
TraesCS1D02G338000	O-methyltransferase ZRP4	359	20	0	86.55
TraesCS1D02G338100	O-methyltransferase ZRP4	362	20	0	82.02
TraesCS1D02G338200	O-methyltransferase ZRP4	359	20	0	86.97
TraesCS1D02G341700	predicted protein	290	20	0	75.41
TraesCS1D02G342100	chaperone protein ClpB1	918	20	0	98.11
TraesCS1D02G343800	kinesin-related protein3	1082	20	0	79.96
TraesCS1D02G352200	ubiquitin domain-containing protein 1-like	113	20	2.02e-81	89.49
TraesCS1D02G352600	chaperone protein dnaJ C76, chloroplastic	348	20	0	84.1
TraesCS1D02G362100	putative lipid-binding protein At4g00165	141	12	4.38e-72	64.5
TraesCS1D02G363500	probable protein phosphatase 2C 50	382	20	0	87.16
TraesCS1D02G367000	neurofilament heavy polypeptide-like	386	20	0	63.14
TraesCS1D02G368900	catalytic/ hydrolase isoform X1	415	20	0	87.99
TraesCS1D02G369200	late embryogenesis abundant protein	220	20	7.53e-141	84.32
TraesCS1D02G369300	ABA-inducible protein PHV A1-like	163	20	2.5e-109	84.01
TraesCS1D02G369400	ABA-inducible protein PHV A1-like	180	20	7.47e-120	86.33
TraesCS1D02G369500	ABA-inducible protein PHV A1-like	180	20	1.41e-120	87.22
TraesCS1D02G369800	predicted protein	214	20	3.39e-142	72.8
TraesCS1D02G372500	mitogen-activated protein kinase kinase kinase NPK1-like	459	20	0	77.73
TraesCS1D02G374900	predicted protein	265	20	0	97.93
TraesCS1D02G375000	predicted protein	239	20	7.04e-171	88.52
TraesCS1D02G375100	predicted protein	265	20	0	97.18
TraesCS1D02G375500	phosphomethylethanolamine N-methyltransferase-like	486	20	0	93.59
TraesCS1D02G375600	phosphomethylethanolamine N-methyltransferase-like	486	20	0	93.59
TraesCS1D02G375700	phosphomethylethanolamine N-methyltransferase-like	498	20	0	93.66
TraesCS1D02G380000	E3 ubiquitin-protein ligase Arkadia	265	20	2.48e-162	80.41
TraesCS1D02G381100	non-specific lipid-transfer protein 2	96	20	2.63e-63	86.19
TraesCS1D02G392000	CASP-like protein 1U2	172	20	4.48e-116	69.2
TraesCS1D02G393500	O-acyltransferase WSD1	538	20	0	80.89
TraesCS1D02G395700	ARM repeat superfamily protein	485	20	0	85.3
TraesCS1D02G402000	pinin-like isoform X1	531	20	0	80.04
TraesCS1D02G403300	premnaspirodiene oxygenase	530	20	0	84.22
TraesCS1D02G403400	protein DEHYDRATION-INDUCED 19	225	20	5.33e-168	83.6
TraesCS1D02G405300	splicing factor U2af small subunit B	234	20	6.85e-148	81.51
TraesCS1D02G411300	predicted protein	266	20	0	98.08
TraesCS1D02G411600	predicted protein	266	20	0	97.31
TraesCS1D02G412200	aspartic proteinase oryzasin-1	453	20	0	83.5
TraesCS1D02G413800	acetylserotonin O-methyltransferase 1-like	364	20	0	74.85
TraesCS1D02G415900	salutaridine reductase	312	20	0	81.79
TraesCS1D02G417100	G-box binding factor	402	20	0	83.35
TraesCS1D02G418900	ethylene-responsive transcription factor ERF061	283	20	0	76.9
TraesCS1D02G419400	CTP synthase family protein	580	20	0	92.46
TraesCS1D02G425600	polygalacturonase At1g48100	527	20	0	80.91
TraesCS1D02G428600	Plant basic secretory protein (BSP) family protein	299	20	0	65.12
TraesCS1D02G428800	probable solanesyl-diphosphate synthase 3, chloroplastic	402	20	0	92.49
TraesCS1D02G430600	Sorting nexin-16	1122	20	0	85.01
TraesCS1D02G431000	putative receptor-like protein kinase At4g00960	641	20	0	76.83
TraesCS1D02G431700	putative cell division cycle ATPase	851	20	0	90.33
TraesCS1D02G432400	Late embryogenesis abundant protein Lea14-A	163	20	4.45e-118	89.76
TraesCS1D02G433600	berberine bridge enzyme-like 18	540	20	0	84.94
TraesCS1D02G436500	RNA polymerase sigma factor sigE, chloroplastic/mitochondrial	494	20	0	82.56
TraesCS1D02G440500	pathogen-related protein	234	20	7.84e-176	90.34
TraesCS1D02G441400	L-type lectin-domain containing receptor kinase IX.1	712	20	0	78.13
TraesCS1D02G451900	UDP-glucose 4-epimerase 1	354	20	0	92.36
TraesCS1D02G453600	Protein argonaute 4B	922	20	0	91.32
TraesCS2A02G000400	probable protein phosphatase 2C 37	435	20	0	70.84
TraesCS2A02G000600	probable NAD(P)H-dependent oxidoreductase 1	329	20	0	80.27
TraesCS2A02G002700	acyl transferase 15	455	20	0	68.79
TraesCS2A02G010000	predicted protein	83	13	1.59e-45	66.9
TraesCS2A02G011300	uncharacterized protein LOC109751215	375	20	0	83.18
TraesCS2A02G022100	probable E3 ubiquitin-protein ligase HIP1	701	20	0	80.24
TraesCS2A02G022800	tyrosine N-monooxygenase-like	530	20	0	85.3
TraesCS2A02G026600	predicted protein	369	20	0	90.74
TraesCS2A02G026700	1-aminocyclopropane-1-carboxylate oxidase homolog 1-like	375	20	0	83.59
TraesCS2A02G027000	actin-related protein 9 isoform X1	526	20	0	84.59
TraesCS2A02G027800	syn-copalyl diphosphate synthase-like	757	20	0	89.45
TraesCS2A02G030000	Putative disease resistance RPP13-like protein 1	1120	20	0	66.33
TraesCS2A02G032500	ATP sulfurylase 2-like	420	20	0	95.93
TraesCS2A02G033400	stachyose synthase	488	20	8.77e-139	51.23
TraesCS2A02G034400	dirigent protein 11-like	223	20	6.32e-166	65.28
TraesCS2A02G036300	acetyl-CoA acetyltransferase, cytosolic 1	401	20	0	96.82
TraesCS2A02G036900	1-aminocyclopropane-1-carboxylate oxidase homolog 1-like	364	20	0	74.95
TraesCS2A02G037400	stress-response A/B barrel domain-containing protein HS1	115	20	8.97e-76	85.48
TraesCS2A02G039400	Beta-glucosidase 16	280	20	0	90.06
TraesCS2A02G042000	Phosphoglycerate mutase-like protein	207	20	3.95e-133	83.25
TraesCS2A02G042500	putative disease resistance protein RGA1	986	20	0	57.32
TraesCS2A02G044900	3,9-dihydroxypterocarpan 6A-monooxygenase	551	20	0	83.85
TraesCS2A02G045400	glutathione transferase	216	20	1.46e-155	90.02
TraesCS2A02G045800	GDSL esterase/lipase LTL1	369	20	0	90.05
TraesCS2A02G046200	nuclear transport factor 2 (NTF2)-like protein	199	20	4.5e-115	82.59
TraesCS2A02G046500	serine carboxypeptidase-like 11	471	20	0	84.41
TraesCS2A02G049900	nicotianamine synthase	330	20	0	95.46
TraesCS2A02G052500	Transmembrane amino acid transporter family protein	554	20	0	87.73
TraesCS2A02G053100	lectin receptor kinase	687	20	0	87.44
TraesCS2A02G053300	predicted protein	529	20	0	77.91
TraesCS2A02G057000	L-type lectin-domain containing receptor kinase IX.1	653	20	0	66.9
TraesCS2A02G062600	proline-rich protein 4-like	214	20	3.71e-142	90.62
TraesCS2A02G064900	heavy metal-associated isoprenylated plant protein 27	155	20	4.54e-112	93.92
TraesCS2A02G066700	predicted protein	174	20	3.32e-128	98.34
TraesCS2A02G066900	predicted protein	192	20	6.96e-129	98.19
TraesCS2A02G067000	predicted protein	175	20	7.22e-129	97.26
TraesCS2A02G067100	predicted protein	175	20	7.16e-128	97.68
TraesCS2A02G067200	predicted protein	175	20	9.27e-130	97.46
TraesCS2A02G067300	predicted protein	175	20	8.68e-130	98.51
TraesCS2A02G070100	anthocyanidin 5,3-O-glucosyltransferase	483	20	0	86.28
TraesCS2A02G074700	lipoamide acyltransferase component of branched-chain alpha-keto acid dehydrogenase complex, mitochondrial	511	20	0	87.55
TraesCS2A02G075000	Germin-like protein 8-14	213	20	1.02e-150	93.88
TraesCS2A02G075200	transketolase, chloroplastic	709	20	0	91.53
TraesCS2A02G081300	transcription factor BHLH062-like	338	20	0	80.2
TraesCS2A02G084800	omega-3 fatty acid desaturase, chloroplastic	444	20	0	85.47
TraesCS2A02G087100	probable protein phosphatase 2C 32	390	20	0	71.72
TraesCS2A02G092200	Wound-induced protein 1	101	20	5.47e-62	79.24
TraesCS2A02G096500	nuclear poly(A) polymerase 3	498	20	0	84.64
TraesCS2A02G097400	galactinol synthase 2-like	323	20	0	90.35
TraesCS2A02G099900	ETHYLENE INSENSITIVE 3-like 1 protein	618	20	0	69.2
TraesCS2A02G107600	root peroxidase	314	20	0	98.01
TraesCS2A02G113600	3-oxo-5-alpha-steroid 4-dehydrogenase 2	272	20	0	84.89
TraesCS2A02G116100	transcription factor NIGT1	475	20	0	69.82
TraesCS2A02G121000	sodium/hydrogen exchanger 2	538	20	0	96.64
TraesCS2A02G123000	momilactone A synthase-like	305	20	0	91.32
TraesCS2A02G123400	predicted protein	581	20	0	83.31
TraesCS2A02G126700	Angio-associated migratory cell protein	382	20	0	88.09
TraesCS2A02G127100	protein EARLY RESPONSIVE TO DEHYDRATION 15	156	20	7.18e-108	70.11
TraesCS2A02G129600	putative UOS1	562	20	0	90.18
TraesCS2A02G130600	ferredoxin-dependent glutamate synthase, chloroplastic	1290	20	0	98.12
TraesCS2A02G136500	(S)-beta-bisabolene synthase	604	20	0	78.61
TraesCS2A02G141100	probable protein phosphatase 2C 65 isoform X1	469	20	0	84.53
TraesCS2A02G143100	probable carboxylesterase 18	349	20	0	87.02
TraesCS2A02G143500	predicted protein	358	20	0	84.77
TraesCS2A02G157800	Transcription factor bHLH47	254	20	0	78.17
TraesCS2A02G158000	Lipase/lipooxygenase PLAT/LH2 family protein	424	20	0	85.65
TraesCS2A02G158600	Subtilisin-chymotrypsin inhibitor-2B	68	20	5.78e-42	83.52
TraesCS2A02G158700	Subtilisin-chymotrypsin inhibitor-2B	67	20	2.04e-41	84.5
TraesCS2A02G158800	Subtilisin-chymotrypsin inhibitor-2B	89	20	3.03e-43	86.22
TraesCS2A02G161200	probable trehalose-phosphate phosphatase 3	358	20	0	86.84
TraesCS2A02G166200	polcalcin Phl p 7 isoform X2	86	20	6.89e-59	82.7
TraesCS2A02G170200	protein STRICTOSIDINE SYNTHASE-LIKE 4-like	396	20	0	80.41
TraesCS2A02G176300	ninja-family protein 5	315	20	0	80.53
TraesCS2A02G177200	putative anthocyanidin reductase	339	20	0	82.52
TraesCS2A02G177300	alpha/beta-Hydrolases superfamily protein	353	20	0	86.52
TraesCS2A02G188600	Polyol transporter 5	515	20	0	91.01
TraesCS2A02G188700	putative polyol transporter 1	529	20	0	87.4
TraesCS2A02G190900	cell wall protein IFF6-like	441	20	0	85.26
TraesCS2A02G193000	U-box domain-containing protein 4	361	20	0	95.27
TraesCS2A02G194500	LOB domain-containing protein 37	234	20	1.52e-163	79.6
TraesCS2A02G199300	remorin 4.1	311	20	0	77.45
TraesCS2A02G204700	myosin-1 isoform X1	1263	20	0	88.79
TraesCS2A02G204800	chlorophyll a-b binding protein of LHCII type III, chloroplastic	268	20	0	95.09
TraesCS2A02G204900	organic cation/carnitine transporter 2-like	527	20	0	87.94
TraesCS2A02G205100	F-box domain-containing protein	164	20	7.46e-117	83.95
TraesCS2A02G205500	Sugar carrier protein C	526	20	0	94.97
TraesCS2A02G214400	chitin-inducible gibberellin-responsive protein 1	570	20	0	93.55
TraesCS2A02G215900	cysteine-rich receptor-like protein kinase 10	696	20	0	82.31
TraesCS2A02G216700	cysteine-rich receptor-like protein kinase 6	685	20	0	86.15
TraesCS2A02G224900	Glucan endo-1,3-beta-glucosidase 3	532	20	0	91.46
TraesCS2A02G233500	protein MAIN-LIKE 1 isoform X1	574	20	0	64.43
TraesCS2A02G238400	zeta-carotene desaturase, chloroplastic/chromoplastic	513	20	0	85.85
TraesCS2A02G254100	uncharacterized oxidoreductase At1g06690, chloroplastic-like	371	20	0	90.39
TraesCS2A02G255600	predicted protein	136	20	1.85e-91	58.82
TraesCS2A02G256200	predicted protein	182	20	3.54e-120	56.39
TraesCS2A02G256300	myosin heavy chain-related	616	20	0	64.89
TraesCS2A02G263800	predicted protein	109	20	3.54e-73	70.76
TraesCS2A02G266900	glycine-rich cell wall structural protein-like	141	20	3.1e-50	80.84
TraesCS2A02G268800	probable pyridoxal 5'-phosphate synthase subunit PDX1.1	386	20	0	94.39
TraesCS2A02G271700	transcription factor bHLH35	278	20	0	77.39
TraesCS2A02G274700	probable aldo-keto reductase 2	346	20	0	92.44
TraesCS2A02G277100	70 kDa peptidyl-prolyl isomerase	582	20	0	92.29
TraesCS2A02G283000	uncharacterized protein LOC109732782	280	20	0	85.02
TraesCS2A02G290300	NAD(P)-binding Rossmann-fold superfamily protein	310	20	0	89.5
TraesCS2A02G291700	Uridylate kinase	499	20	0	86.54
TraesCS2A02G297100	non-specific lipid-transfer protein	126	20	1.28e-74	88.62
TraesCS2A02G297300	protein FAM210B isoform X1	196	20	4.22e-136	84.38
TraesCS2A02G301400	RNA-binding motif protein, X-linked-like-3	221	20	4.72e-126	64
TraesCS2A02G307900	T-complex protein 11	1142	20	0	88.63
TraesCS2A02G309600	predicted protein	484	20	0	91.16
TraesCS2A02G312600	ferric reduction oxidase 7, chloroplastic	748	20	0	87.41
TraesCS2A02G315100	putative lipoxygenase 5	870	20	0	92.83
TraesCS2A02G315600	predicted protein	327	20	0	87.01
TraesCS2A02G317000	Zeaxanthin epoxidase, chloroplastic	652	20	0	92.99
TraesCS2A02G319200	7-deoxyloganetin glucosyltransferase-like	492	20	0	88.7
TraesCS2A02G322400	Programmed cell death protein 4	663	20	0	93.05
TraesCS2A02G322500	ent-isokaurene C2-hydroxylase-like	385	20	0	79.47
TraesCS2A02G323000	BTB/POZ and TAZ domain-containing protein 2	339	20	0	83.55
TraesCS2A02G327000	protein NBR1 homolog isoform X1	833	20	0	68.83
TraesCS2A02G331700	ATP-dependent 6-phosphofructokinase 2	469	20	0	92.6
TraesCS2A02G339100	black hull 4	425	20	0	88.94
TraesCS2A02G342100	PLAT domain-containing protein 3	333	20	4.07e-124	87.26
TraesCS2A02G342800	Gamma-glutamyltranspeptidase 1	357	20	0	88.32
TraesCS2A02G348400	predicted protein	659	16	0	84.74
TraesCS2A02G348500	phosphoglycolate phosphatase 1B, chloroplastic	360	20	0	89.12
TraesCS2A02G348900	B-box zinc finger protein 24	254	20	0	81.22
TraesCS2A02G350800	chitinase 5-like	271	20	0	78.42
TraesCS2A02G355600	PsbP domain-containing protein 4, chloroplastic	271	20	0	90.61
TraesCS2A02G357800	calmodulin-binding receptor-like cytoplasmic kinase 3	314	20	0	85.02
TraesCS2A02G362300	disease resistance protein RGA2 isoform X1	915	20	0	59.25
TraesCS2A02G366100	B-box zinc finger protein 24	262	20	6.67e-176	79.75
TraesCS2A02G367700	TPA_inf: caleosin	243	20	1.93e-176	87.73
TraesCS2A02G371600	L-type lectin-domain containing receptor kinase IV.1	678	20	0	91.56
TraesCS2A02G372400	probable beta-D-xylosidase 6	772	20	0	90.23
TraesCS2A02G375000	Endosomal targeting BRO1-like domain-containing protein	416	20	0	91.36
TraesCS2A02G378300	cytokinin dehydrogenase 8 isoform X1	528	20	0	85.56
TraesCS2A02G379800	aquaporin PIP2-5	290	20	0	95.61
TraesCS2A02G379900	aquaporin PIP2-5	290	20	0	95.61
TraesCS2A02G380100	predicted protein	178	20	1.27e-109	72.63
TraesCS2A02G380900	phenylalanine ammonia-lyase-like	713	20	0	96.83
TraesCS2A02G381000	phenylalanine ammonia-lyase-like	713	20	0	97.04
TraesCS2A02G381100	phenylalanine ammonia-lyase-like	713	20	0	97.36
TraesCS2A02G389400	homeobox-leucine zipper protein HOX22	265	20	0	78.28
TraesCS2A02G393800	OSJNBa0088A01.13-like protein	171	20	6.73e-116	71.15
TraesCS2A02G393900	pentatricopeptide repeat-containing protein At5g13770, chloroplastic	609	20	0	82.25
TraesCS2A02G394500	heavy metal-associated isoprenylated plant protein 28	122	20	5.03e-88	79.68
TraesCS2A02G395000	flavanone 3-dioxygenase 2-like	340	20	0	90.71
TraesCS2A02G399200	SPX domain-containing membrane protein OsI_17046	700	20	0	92.34
TraesCS2A02G400100	F-box protein PP2-A13	298	20	0	87.62
TraesCS2A02G404000	Transducin/WD40 repeat-like superfamily protein	1023	20	0	89.07
TraesCS2A02G404700	Niemann-Pick C1 protein-like	1284	20	0	93.03
TraesCS2A02G405000	root hair specific 17	626	20	0	86.12
TraesCS2A02G407700	Aquaporin PIP1-2	288	20	0	98.61
TraesCS2A02G410300	putative cis-zeatin O-glucosyltransferase	464	20	0	75.85
TraesCS2A02G416900	nudix hydrolase 8	289	20	0	92.16
TraesCS2A02G418200	probable LRR receptor-like serine/threonine-protein kinase At1g56130	1015	20	0	90.7
TraesCS2A02G418300	probable LRR receptor-like serine/threonine-protein kinase At1g56130	1013	20	0	90.28
TraesCS2A02G420000	predicted protein	376	20	0	87.55
TraesCS2A02G424861	36.4 kDa proline-rich protein-like	605	20	1.38e-160	82.8
TraesCS2A02G425800	Vacuolar-sorting receptor 7	482	20	0	80.38
TraesCS2A02G427700	ethylene-responsive transcription factor 4	210	20	1.89e-136	79.62
TraesCS2A02G428500	probable protein phosphatase 2C 44	342	20	0	87.27
TraesCS2A02G432700	calcium-transporting ATPase 5, plasma membrane-type isoform X1	1081	20	0	93.34
TraesCS2A02G433500	putative xyloglucan endotransglucosylase/hydrolase protein 13	335	20	0	77.25
TraesCS2A02G438200	ubiquinol oxidase 2, mitochondrial-like	330	20	0	88.97
TraesCS2A02G438300	ubiquinol oxidase 2, mitochondrial-like	329	20	0	87.53
TraesCS2A02G453300	receptor-like protein kinase FERONIA	503	20	0	78.95
TraesCS2A02G453700	protein MARD1-like	93	20	2.83e-62	86.43
TraesCS2A02G453900	predicted protein	98	20	2.31e-62	88.05
TraesCS2A02G454800	OSJNBa0013K16.15-like protein	123	20	1.2e-86	80.73
TraesCS2A02G455200	glutamate receptor 3.1	919	20	0	85.02
TraesCS2A02G456600	protein REVEILLE 7-like	418	20	0	64.64
TraesCS2A02G461300	hypothetical protein TRIUR3_02612	80	2	2.58e-43	97.5
TraesCS2A02G467300	probable polyamine oxidase 2	484	20	0	96.44
TraesCS2A02G467500	pectinesterase inhibitor 8	247	20	1.09e-106	79.24
TraesCS2A02G467700	peroxisomal (S)-2-hydroxy-acid oxidase GLO3	369	20	0	96.51
TraesCS2A02G468500	polyphenol oxidase	572	20	0	93.02
TraesCS2A02G468800	soluble starch synthase III-1	1289	20	0	84.13
TraesCS2A02G477900	methylmalonate-semialdehyde dehydrogenase [acylating], mitochondrial	533	20	0	96.2
TraesCS2A02G478600	sugar transport protein MST1-like	402	20	0	72.6
TraesCS2A02G484200	probable metal-nicotianamine transporter YSL6	580	20	0	92.14
TraesCS2A02G488900	beta-fructofuranosidase, insoluble isoenzyme 7-like	590	20	0	86.42
TraesCS2A02G492500	predicted protein	248	20	7.75e-148	75.56
TraesCS2A02G493500	flavanone 3-hydroxylase	377	20	0	94.83
TraesCS2A02G493800	serine/threonine-protein kinase SAPK1	342	20	0	96.07
TraesCS2A02G501800	predicted protein	462	20	0	79.74
TraesCS2A02G501900	predicted protein	410	20	0	89.48
TraesCS2A02G510400	probable isoaspartyl peptidase/L-asparaginase 2	333	20	0	96.44
TraesCS2A02G510700	probable isoaspartyl peptidase/L-asparaginase 2	333	20	0	96.66
TraesCS2A02G510800	probable isoaspartyl peptidase/L-asparaginase 2	333	20	0	96.76
TraesCS2A02G515700	glycerol kinase	534	20	0	93.92
TraesCS2A02G517900	Haloalkane dehalogenase 2	393	20	0	86.65
TraesCS2A02G518000	---NA---	0
TraesCS2A02G523200	programmed cell death protein 2-like isoform X1	375	20	0	83.79
TraesCS2A02G523500	uncharacterized aarF domain-containing protein kinase At1g71810, chloroplastic	454	20	0	91.21
TraesCS2A02G527800	---NA---	0
TraesCS2A02G536200	predicted protein	338	20	0	77.57
TraesCS2A02G539400	predicted protein	158	20	3.88e-107	74.65
TraesCS2A02G539500	heavy metal-associated isoprenylated plant protein 39-like	158	20	1.52e-72	75.22
TraesCS2A02G546900	putative phytol kinase, chloroplastic	300	20	2.67e-175	83.26
TraesCS2A02G551100	two-component response regulator ORR6	176	20	3.86e-125	90.97
TraesCS2A02G564200	putative disease resistance RPP13-like protein 2	1894	20	0	65.18
TraesCS2A02G565400	probable 1-deoxy-D-xylulose-5-phosphate synthase 2, chloroplastic	721	20	0	93.24
TraesCS2A02G571300	cationic peroxidase SPC4	370	20	0	82.5
TraesCS2A02G571800	protein NRT1/ PTR FAMILY 5.10	543	20	0	78.17
TraesCS2A02G573900	predicted protein	341	20	0	83.91
TraesCS2A02G577600	3-isopropylmalate dehydrogenase 2, chloroplastic	399	20	0	94.12
TraesCS2A02G581000	mpv17 / PMP22 family protein	333	20	0	82.41
TraesCS2A02G581600	oxalate--CoA ligase	529	20	0	86.32
TraesCS2A02G583900	predicted protein	289	20	0	73.3
TraesCS2A02G586500	stem-specific protein TSJT1	264	20	0	85.83
TraesCS2A02G590600	protochlorophyllide reductase A, chloroplastic	388	20	0	92.37
TraesCS2A02G593300	NDR1/HIN1-like protein 6	253	20	4.36e-155	78.89
TraesCS2B02G010300	uncharacterized protein LOC109751215	514	20	0	83.29
TraesCS2B02G013200	alpha-humulene synthase-like	530	20	0	78.42
TraesCS2B02G023600	probable protein phosphatase 2C 37	460	20	0	72.7
TraesCS2B02G028000	dirigent protein 5-like	202	20	3.63e-119	81.04
TraesCS2B02G028500	dirigent protein 5-like	202	20	3.01e-119	80.83
TraesCS2B02G036800	putative receptor-like protein kinase At4g00960 isoform X1	483	20	0	71.9
TraesCS2B02G040000	predicted protein	369	20	0	91.29
TraesCS2B02G040100	1-aminocyclopropane-1-carboxylate oxidase homolog 1-like	364	20	0	84.21
TraesCS2B02G040500	scopoletin glucosyltransferase	477	20	0	76.5
TraesCS2B02G040600	scopoletin glucosyltransferase	477	20	0	76.27
TraesCS2B02G041200	acetylserotonin O-methyltransferase 1	365	20	0	76.21
TraesCS2B02G044300	hypothetical protein TRIUR3_18758	522	20	0	59.54
TraesCS2B02G044900	Putative disease resistance RPP13-like protein 1	1088	20	0	65.25
TraesCS2B02G048700	arginase 1, mitochondrial	416	20	0	97.28
TraesCS2B02G049100	uncharacterized acetyltransferase At3g50280-like	507	20	0	77.54
TraesCS2B02G062500	putative methyltransferase DDB_G0268948	260	20	0	85.3
TraesCS2B02G065200	Transmembrane amino acid transporter family protein	557	20	0	86.69
TraesCS2B02G073500	ubiquitin thioesterase otubain-like	478	20	0	78.76
TraesCS2B02G077100	heavy metal-associated isoprenylated plant protein 27	155	20	9.07e-112	94.32
TraesCS2B02G079400	predicted protein	175	20	8.68e-130	98.51
TraesCS2B02G079500	predicted protein	193	20	3.58e-129	98.31
TraesCS2B02G083700	anthocyanidin 5,3-O-glucosyltransferase	487	20	0	86.4
TraesCS2B02G083800	lactoylglutathione lyase	242	20	1.22e-161	87.77
TraesCS2B02G086200	Aspartic proteinase nepenthesin-1	466	20	0	64.54
TraesCS2B02G090300	germin-like protein 8-14	212	20	2.14e-146	94.97
TraesCS2B02G095900	transcription factor BHLH062-like	270	20	0	80.12
TraesCS2B02G097400	probable metal-nicotianamine transporter YSL6	670	20	0	92.28
TraesCS2B02G100300	putative disease resistance protein At1g50180	468	20	0	64
TraesCS2B02G100800	mannose/glucose-specific lectin-like	304	20	0	86.97
TraesCS2B02G101800	probable protein phosphatase 2C 32	385	20	0	69.79
TraesCS2B02G105300	abscisic acid receptor PYL4-like	217	20	9.16e-151	86.36
TraesCS2B02G107100	wound-induced protein 1-like	101	20	1.6e-62	79.91
TraesCS2B02G109800	galactinol synthase 2-like	322	20	0	90.86
TraesCS2B02G112800	galactinol synthase 2-like	319	20	0	90.28
TraesCS2B02G118900	stress responsive protein	224	20	2.78e-146	96.03
TraesCS2B02G124100	CBL-interacting protein kinase 29	436	20	0	87.22
TraesCS2B02G124600	predicted protein	314	20	0	93.98
TraesCS2B02G124800	predicted protein	316	20	0	94.19
TraesCS2B02G125800	predicted protein	314	20	0	93.29
TraesCS2B02G126200	predicted protein	314	20	0	93.63
TraesCS2B02G128300	phylloplanin-like	140	20	8.55e-94	86.25
TraesCS2B02G132100	beta-D-glucosyl crocetin beta-1,6-glucosyltransferase	466	20	0	84.49
TraesCS2B02G132500	beta-D-glucosyl crocetin beta-1,6-glucosyltransferase	466	20	0	84.89
TraesCS2B02G132700	beta-D-glucosyl crocetin beta-1,6-glucosyltransferase	466	20	0	84.3
TraesCS2B02G133000	protein ETHYLENE-INSENSITIVE 2	1200	20	0	76.81
TraesCS2B02G135900	potassium transporter 7	547	20	0	93.85
TraesCS2B02G138200	hypothetical protein TRIUR3_29094	847	20	0	59.48
TraesCS2B02G141900	Na+/H+ antiporter	598	20	0	95.95
TraesCS2B02G145700	4-alpha-glucanotransferase DPE2	922	20	0	93.91
TraesCS2B02G145800	tyrosine-specific transport protein-like	473	20	0	89.41
TraesCS2B02G148200	predicted protein	330	20	0	89.86
TraesCS2B02G148900	protein EARLY RESPONSIVE TO DEHYDRATION 15	187	20	4.69e-96	60.7
TraesCS2B02G151200	F-box protein SKIP5	253	20	0	93.08
TraesCS2B02G151800	putative UOS1	559	20	0	86.3
TraesCS2B02G152900	ferredoxin-dependent glutamate synthase, chloroplastic	1607	20	0	96.85
TraesCS2B02G160400	(S)-beta-bisabolene synthase	604	20	0	78.14
TraesCS2B02G160700	protein SSUH2 homolog	462	20	0	84.46
TraesCS2B02G166100	probable protein phosphatase 2C 65 isoform X2	363	20	0	87.88
TraesCS2B02G168300	probable carboxylesterase 18	347	20	0	80.77
TraesCS2B02G174500	predicted protein	654	20	0	86.66
TraesCS2B02G177300	cytochrome P450 709B1-like	514	20	0	94.46
TraesCS2B02G183300	transcription factor BHLH062	260	20	3.61e-180	77.38
TraesCS2B02G183600	UDP-glycosyltransferase 89B2-like	498	20	0	78.49
TraesCS2B02G183700	Lipase/lipooxygenase PLAT/LH2 family protein	424	20	0	84.88
TraesCS2B02G186400	Chaperone DnaJ-domain superfamily protein	273	20	2.9e-164	90.56
TraesCS2B02G189700	Alcohol dehydrogenase-like 7	392	20	0	83.56
TraesCS2B02G194200	sucrose synthase1	831	20	0	96.97
TraesCS2B02G196500	protein STRICTOSIDINE SYNTHASE-LIKE 4-like	367	20	0	85.64
TraesCS2B02G198300	mutS-like protein 4	807	20	0	95.89
TraesCS2B02G202700	ninja-family protein 5	293	20	0	75.13
TraesCS2B02G204200	alpha/beta-Hydrolases superfamily protein	358	20	0	85.51
TraesCS2B02G212400	LOB domain-containing protein 37	237	20	1.34e-166	79.92
TraesCS2B02G213400	interferon-related developmental regulator family protein / IFRD protein family	435	20	0	91.26
TraesCS2B02G213900	U-box domain-containing protein 4	361	20	0	95.03
TraesCS2B02G218600	putative polyol transporter 1	558	20	0	87.87
TraesCS2B02G218700	Polyol transporter 5	565	20	0	90.63
TraesCS2B02G224000	phenylalanine ammonia-lyase-like	707	20	0	96.7
TraesCS2B02G226600	remorin 4.1	308	20	2.39e-176	78.21
TraesCS2B02G226900	polygalacturonase inhibitor 1	334	20	0	87.19
TraesCS2B02G232000	heat stress transcription factor A-3	345	20	0	75.11
TraesCS2B02G232300	myosin-1 isoform X1	1272	20	0	88.96
TraesCS2B02G232400	organic cation/carnitine transporter 2-like	527	20	0	88.09
TraesCS2B02G240200	beta-amylase isoform X1	589	20	0	87.75
TraesCS2B02G240900	cysteine-rich receptor-like protein kinase 10	697	20	0	82.57
TraesCS2B02G241400	putative receptor-like protein kinase At4g00960	440	20	0	75.95
TraesCS2B02G242200	cysteine-rich receptor-like protein kinase 6	305	20	0	78.74
TraesCS2B02G244100	probable glutathione S-transferase GSTU6	239	20	2.6e-168	81.07
TraesCS2B02G247300	18.8 kDa class V heat shock protein	163	20	5.58e-70	68.49
TraesCS2B02G266000	probable inositol transporter 2	577	20	0	86.15
TraesCS2B02G266900	probable LRR receptor-like serine/threonine-protein kinase At2g16250	757	20	0	79.82
TraesCS2B02G268000	uncharacterized oxidoreductase At1g06690, chloroplastic-like	371	20	0	90.1
TraesCS2B02G269300	3-oxo-5-alpha-steroid 4-dehydrogenase 1	289	20	1.92e-153	73.57
TraesCS2B02G271900	CSC1-like protein ERD4	734	20	0	88.98
TraesCS2B02G272400	187-kDa microtubule-associated protein AIR9	1654	20	0	89.93
TraesCS2B02G274900	Glucan endo-1,3-beta-glucosidase 3	532	20	0	92.09
TraesCS2B02G275100	probable 5'-adenylylsulfate reductase 1, chloroplastic	463	20	0	91.01
TraesCS2B02G275500	glycine-rich cell wall structural protein-like	141	20	1.92e-50	78.45
TraesCS2B02G278400	predicted protein	109	20	1.54e-73	70.83
TraesCS2B02G282400	sugar transport protein MST3	517	20	0	92.81
TraesCS2B02G286300	predicted protein	180	20	2.02e-120	56.27
TraesCS2B02G289900	transcription factor bHLH35	278	20	0	77.59
TraesCS2B02G294500	70 kDa peptidyl-prolyl isomerase	587	20	0	92.15
TraesCS2B02G302400	ACT domain-containing protein ACR6-like	443	20	0	83.46
TraesCS2B02G306800	NAD(P)-binding Rossmann-fold superfamily protein	310	20	0	90.42
TraesCS2B02G311300	alpha carbonic anhydrase 1, chloroplastic-like	278	20	0	82.33
TraesCS2B02G313300	lipid binding protein	126	20	2.23e-75	89.26
TraesCS2B02G326700	predicted protein	484	20	0	91.05
TraesCS2B02G326800	two-component response regulator ORR1	169	20	8e-118	80.32
TraesCS2B02G326900	chloride channel protein CLC-c	805	20	0	94.33
TraesCS2B02G329600	ferric reduction oxidase 7, chloroplastic	747	20	0	86.93
TraesCS2B02G333600	putative lipoxygenase 5	917	20	0	92.46
TraesCS2B02G335400	zeaxanthin epoxidase, chloroplastic	656	20	0	91.62
TraesCS2B02G342900	black hull 4	425	20	0	89.15
TraesCS2B02G350500	ATP-dependent 6-phosphofructokinase 2	469	20	0	92.33
TraesCS2B02G351100	probable amino acid permease 7 isoform X2	459	20	0	91.22
TraesCS2B02G359000	2-oxoglutarate-dependent dioxygenase DAO	298	20	0	91.9
TraesCS2B02G359600	BTB/POZ and TAZ domain-containing protein 2	339	20	0	83.92
TraesCS2B02G360400	Programmed cell death protein 4	665	20	0	93.16
TraesCS2B02G366900	phosphoglycolate phosphatase 1B, chloroplastic	362	20	0	89.14
TraesCS2B02G367300	B-box zinc finger protein 24	257	20	5.57e-176	81.33
TraesCS2B02G369000	chitinase	275	20	0	78.93
TraesCS2B02G369400	F-box protein At1g78280	932	20	0	87.86
TraesCS2B02G377100	calmodulin-binding receptor-like cytoplasmic kinase 3	314	20	0	85.48
TraesCS2B02G377500	adenine phosphoribosyltransferase 2	206	20	2.54e-143	92.17
TraesCS2B02G380000	protein LOW PSII ACCUMULATION 1, chloroplastic isoform X2	331	20	0	83.76
TraesCS2B02G385200	TPA_inf: caleosin	243	20	0	88.96
TraesCS2B02G389400	probable beta-D-xylosidase 6	773	20	0	90.65
TraesCS2B02G390700	granule-bound starch synthase II	599	20	0	92.53
TraesCS2B02G391900	Endosomal targeting BRO1-like domain-containing protein	415	20	0	91.29
TraesCS2B02G392700	cytosolic sulfotransferase 14	341	20	0	82.41
TraesCS2B02G394500	probable metal-nicotianamine transporter YSL13	720	20	0	89.99
TraesCS2B02G396800	aquaporin PIP2-5	290	20	0	95.77
TraesCS2B02G398200	phenylalanine ammonia-lyase-like	713	20	0	96.89
TraesCS2B02G398300	Phenylalanine ammonia-lyase	368	20	0	97.96
TraesCS2B02G398400	phenylalanine ammonia-lyase-like	713	20	0	96.96
TraesCS2B02G403000	beta-fructofuranosidase 1	659	20	0	85.2
TraesCS2B02G406600	B-box zinc finger protein 20-like isoform X2	264	20	5.24e-148	79.87
TraesCS2B02G407600	homeobox-leucine zipper protein HOX22	260	20	1.39e-146	79.17
TraesCS2B02G410700	unnamed protein product	367	3	1.15e-131	72.9
TraesCS2B02G411800	OSJNBa0088A01.13-like protein	171	20	4.98e-119	72.04
TraesCS2B02G411900	pentatricopeptide repeat-containing protein At5g13770, chloroplastic	610	20	0	82.27
TraesCS2B02G412500	heavy metal-associated isoprenylated plant protein 28	122	20	3.8e-86	79.86
TraesCS2B02G413000	flavanone 3-dioxygenase 2-like	340	20	0	89.91
TraesCS2B02G414000	Os10g0534801, partial	502	2	6.71e-55	61.36
TraesCS2B02G414100	transferase, transferring glycosyl groups	518	20	0	91.27
TraesCS2B02G414700	predicted protein	243	20	6.05e-171	79.11
TraesCS2B02G418200	F-box protein PP2-A13	303	20	0	85.91
TraesCS2B02G419600	heat stress transcription factor B-2a-like	302	20	0	75.21
TraesCS2B02G421900	Transducin/WD40 repeat-like superfamily protein	1023	20	0	89.15
TraesCS2B02G437200	probable LRR receptor-like serine/threonine-protein kinase At1g56130	1014	20	0	90.85
TraesCS2B02G437300	probable LRR receptor-like serine/threonine-protein kinase At1g56130	1021	20	0	90.05
TraesCS2B02G439100	predicted protein	376	20	0	88.37
TraesCS2B02G445200	ent-kaur-16-ene synthase, chloroplastic-like	857	20	0	81.8
TraesCS2B02G445300	ent-kaurene oxidase	513	20	0	90.77
TraesCS2B02G445500	syn-copalyl diphosphate synthase	797	20	0	76.88
TraesCS2B02G445600	Cytochrome P450 99A2	508	20	0	81.86
TraesCS2B02G445800	acyclic sesquiterpene synthase-like isoform X2	634	20	0	82.2
TraesCS2B02G448100	ethylene-responsive transcription factor 4	219	20	1.1e-88	77.41
TraesCS2B02G449200	probable protein phosphatase 2C 44	318	20	0	93.97
TraesCS2B02G451700	cation transporter HKT4-like	481	20	0	81.74
TraesCS2B02G454500	putative xyloglucan endotransglucosylase/hydrolase protein 13	311	20	0	77.45
TraesCS2B02G456100	probable E3 ubiquitin-protein ligase RHG1A	373	20	0	75.63
TraesCS2B02G459100	ubiquinol oxidase 2, mitochondrial-like	330	20	0	89
TraesCS2B02G469000	PLATZ transcription factor	246	20	0	87.58
TraesCS2B02G471800	methylesterase 7-like isoform X2	262	20	0	85.75
TraesCS2B02G472800	putative ABC transporter C family member 15	1661	20	0	92.92
TraesCS2B02G474700	predicted protein	105	20	2.95e-68	77
TraesCS2B02G475100	protein MARD1-like	93	20	3.59e-59	87.22
TraesCS2B02G475600	predicted protein	98	20	3.46e-61	89.02
TraesCS2B02G477300	glutamate receptor 3.1	919	20	0	84.84
TraesCS2B02G478700	protein REVEILLE 7-like	415	20	0	65.05
TraesCS2B02G483100	hypothetical protein TRIUR3_02612	80	2	1.37e-41	97.5
TraesCS2B02G490100	probable polyamine oxidase 2	484	20	0	96.42
TraesCS2B02G490400	pectinesterase inhibitor 8	181	20	8.51e-108	77.51
TraesCS2B02G491400	polyphenol oxidase	577	20	0	92.77
TraesCS2B02G491700	soluble starch synthase III-1	1276	20	0	86.4
TraesCS2B02G501000	type 1 non specific lipid transfer protein precursor	114	20	1e-75	90.17
TraesCS2B02G501200	methylmalonate-semialdehyde dehydrogenase [acylating], mitochondrial	534	20	0	95.9
TraesCS2B02G504000	histone-lysine N-methyltransferase ATXR2	476	20	0	91.11
TraesCS2B02G510300	probable metal-nicotianamine transporter YSL6	525	20	0	89.82
TraesCS2B02G512400	receptor-like serine/threonine-protein kinase SD1-8	721	20	0	83.29
TraesCS2B02G516700	beta-fructofuranosidase, insoluble isoenzyme 7-like	594	20	0	86.1
TraesCS2B02G517400	WRKY45-like transcription factor	297	20	0	83
TraesCS2B02G520200	PHD finger-like domain-containing protein 5B	110	14	2.66e-77	84.61
TraesCS2B02G521500	flavanone 3-hydroxylase	378	20	0	94.83
TraesCS2B02G521800	serine/threonine-protein kinase SAPK1	343	20	0	96.5
TraesCS2B02G529300	ribulose bisphosphate carboxylase/oxygenase activase, chloroplastic	444	20	0	87.28
TraesCS2B02G530000	predicted protein	462	20	0	79.64
TraesCS2B02G530100	predicted protein	410	20	0	89.3
TraesCS2B02G531000	predicted protein	567	20	0	65.9
TraesCS2B02G535400	endonuclease 2	290	20	0	90.61
TraesCS2B02G536500	wall-associated receptor kinase-like 8	753	20	0	79.37
TraesCS2B02G538600	probable isoaspartyl peptidase/L-asparaginase 2	333	20	0	96.45
TraesCS2B02G538700	probable isoaspartyl peptidase/L-asparaginase 2	333	20	0	96.33
TraesCS2B02G538800	probable isoaspartyl peptidase/L-asparaginase 2	140	20	1.11e-94	98.01
TraesCS2B02G539100	predicted protein	124	20	5.48e-50	84.75
TraesCS2B02G541300	DNA topoisomerase 2	85	20	4.23e-54	69.06
TraesCS2B02G541400	uncharacterized LOC100303807	74	20	2.73e-23	67.08
TraesCS2B02G543800	Transcription factor ORG2	231	20	3.76e-127	77.07
TraesCS2B02G551700	predicted protein	112	15	2.15e-67	84.41
TraesCS2B02G553400	uncharacterized aarF domain-containing protein kinase At1g71810, chloroplastic	709	20	0	91.56
TraesCS2B02G553600	stress enhanced protein 2, chloroplastic	189	20	1.99e-134	82.89
TraesCS2B02G555100	phenolic glucoside malonyltransferase 2-like	440	20	0	78.88
TraesCS2B02G569200	heavy metal-associated isoprenylated plant protein 39-like	133	20	2.56e-90	71.72
TraesCS2B02G569300	heavy metal-associated isoprenylated plant protein 39-like	130	20	4.51e-52	70.09
TraesCS2B02G569500	heavy metal-associated isoprenylated plant protein 39-like	162	20	7.88e-102	74.19
TraesCS2B02G569600	heavy metal-associated isoprenylated plant protein 39-like	153	20	4.21e-62	72.8
TraesCS2B02G570600	putative thiol-disulfide oxudoreductase DCC	214	20	4.33e-153	85.36
TraesCS2B02G577100	geraniol 8-hydroxylase-like	499	20	0	85.34
TraesCS2B02G581900	putative vacuolar defense protein	166	20	8.56e-106	91.24
TraesCS2B02G582000	putative vacuolar defense protein	166	20	1.97e-117	91.29
TraesCS2B02G582100	putative vacuolar defense protein	164	20	6.12e-117	88.74
TraesCS2B02G582300	two-component response regulator ORR6	172	20	4.64e-119	90.94
TraesCS2B02G584100	probable L-type lectin-domain containing receptor kinase S.5	788	20	0	62.76
TraesCS2B02G593000	protochlorophyllide reductase A, chloroplastic	388	20	0	92.65
TraesCS2B02G595300	probable allantoinase	505	20	0	94.37
TraesCS2B02G604800	probable phospholipid hydroperoxide glutathione peroxidase	171	20	7.23e-124	88.59
TraesCS2B02G608900	mpv17 / PMP22 family protein	325	20	0	81.69
TraesCS2B02G615600	cationic peroxidase SPC4	341	20	0	83.4
TraesCS2B02G615800	cationic peroxidase SPC4	346	20	0	82.46
TraesCS2B02G624800	hypothetical protein TRIUR3_25877	263	20	1.13e-146	63.03
TraesCS2B02G626400	probable 1-deoxy-D-xylulose-5-phosphate synthase 2, chloroplastic	713	20	0	93.01
TraesCS2D02G000300	probable protein phosphatase 2C 37	454	20	0	75.95
TraesCS2D02G006500	ent-isokaurene C2-hydroxylase-like	507	20	0	79.25
TraesCS2D02G007000	alpha-humulene synthase-like	541	20	0	78.78
TraesCS2D02G010600	predicted protein	81	10	1.49e-37	66.37
TraesCS2D02G010700	pyruvate dehydrogenase E1 component subunit alpha-3, chloroplastic	362	20	0	81.53
TraesCS2D02G016600	putrescine hydroxycinnamoyltransferase 3	467	20	0	81.4
TraesCS2D02G016900	protein DA1-related 1-like	504	20	0	91.64
TraesCS2D02G021500	predicted protein	523	20	0	78.51
TraesCS2D02G025400	putative receptor-like protein kinase At4g00960	485	20	0	70.35
TraesCS2D02G027700	chalcone synthase	394	20	0	99.27
TraesCS2D02G029300	ent-isokaurene C2-hydroxylase-like	506	20	0	79.37
TraesCS2D02G029500	cytochrome P450 99A2-like	505	20	0	84.55
TraesCS2D02G029800	scopoletin glucosyltransferase	483	20	0	78.1
TraesCS2D02G029900	cytochrome P450 99A2-like	496	20	0	85.2
TraesCS2D02G030000	cytochrome P450 99A2-like	511	20	0	80.39
TraesCS2D02G031000	7-deoxyloganetin glucosyltransferase-like	484	20	0	86.69
TraesCS2D02G033100	chitinase	323	20	0	85.82
TraesCS2D02G033200	heat shock protein 90	712	20	0	96.99
TraesCS2D02G033800	dirigent protein 11-like	223	20	9.57e-171	66.56
TraesCS2D02G033900	sulfur-rich/thionin-like protein	210	20	2.52e-155	61.3
TraesCS2D02G034500	chalcone synthase	395	20	0	99.51
TraesCS2D02G035200	uncharacterized acetyltransferase At3g50280-like	511	20	0	78.27
TraesCS2D02G037300	predicted protein	283	20	0	83.03
TraesCS2D02G041000	phosphoglycerate mutase-like protein 1	388	20	0	85.42
TraesCS2D02G044100	glutathione transferase	216	20	1.58e-160	90.15
TraesCS2D02G044400	GDSL esterase/lipase LTL1	370	20	0	89.84
TraesCS2D02G046600	flowering-promoting factor 1-like protein 5	110	20	7.12e-77	86.33
TraesCS2D02G048800	ABC transporter G family member 28-like	1082	20	0	89.2
TraesCS2D02G049200	nicotianamine synthase	330	20	0	95.75
TraesCS2D02G053800	probable ribosome-binding factor A, chloroplastic	196	20	7.3e-70	72.9
TraesCS2D02G055000	UDP-glucosyltransferase UGT13248 isoform X1	466	20	0	86.88
TraesCS2D02G055900	L-type lectin-domain containing receptor kinase IX.1	673	20	0	67.19
TraesCS2D02G057700	putative receptor-like protein kinase At4g00960 isoform X1	454	20	0	72.95
TraesCS2D02G063000	heavy metal-associated isoprenylated plant protein 27	155	20	9.07e-112	94.32
TraesCS2D02G065200	predicted protein	175	20	1.21e-129	98.31
TraesCS2D02G065300	predicted protein	174	20	3.43e-128	98.46
TraesCS2D02G065400	predicted protein	175	20	1.27e-129	98.51
TraesCS2D02G065600	predicted protein	175	20	8.68e-130	98.51
TraesCS2D02G067800	probable LRR receptor-like serine/threonine-protein kinase At3g47570	1035	20	0	74.4
TraesCS2D02G073400	lipoamide acyltransferase component of branched-chain alpha-keto acid dehydrogenase complex, mitochondrial	508	20	0	87.73
TraesCS2D02G073700	germin-like protein 8-14	212	20	1.67e-151	94.6
TraesCS2D02G073900	transketolase, chloroplastic	708	20	0	91.9
TraesCS2D02G075000	Primary amine oxidase	733	20	0	89.04
TraesCS2D02G079100	transcription factor BHLH062-like	329	20	0	77.76
TraesCS2D02G081000	probable metal-nicotianamine transporter YSL6	670	20	0	92.03
TraesCS2D02G081200	probable metal-nicotianamine transporter YSL6	670	20	0	91.35
TraesCS2D02G084400	probable protein phosphatase 2C 32	389	20	0	72.14
TraesCS2D02G088600	Leucine Rich Repeat family protein, expressed	1015	20	0	74.45
TraesCS2D02G091300	Wound-induced protein 1	97	20	1.42e-65	81.82
TraesCS2D02G091400	D-alanine--D-alanine ligase	921	20	0	87.25
TraesCS2D02G095800	galactinol synthase 2-like	323	20	0	91.45
TraesCS2D02G101000	stress responsive protein	195	20	1.84e-146	96.11
TraesCS2D02G107100	CBL-interacting protein kinase 29	436	20	0	87.67
TraesCS2D02G107600	predicted protein	313	20	0	94.21
TraesCS2D02G108500	predicted protein	314	20	0	94.1
TraesCS2D02G114200	3-oxo-5-alpha-steroid 4-dehydrogenase 2	322	20	0	84.02
TraesCS2D02G128200	cytochrome P450 709B2	517	20	0	82.65
TraesCS2D02G129500	protein EARLY RESPONSIVE TO DEHYDRATION 15	156	20	2.04e-111	69.93
TraesCS2D02G131900	putative UOS1	588	20	0	91.3
TraesCS2D02G132900	ferredoxin-dependent glutamate synthase, chloroplastic	1606	20	0	97.14
TraesCS2D02G136200	magnesium-chelatase subunit ChlH, chloroplastic	1335	20	0	92.04
TraesCS2D02G136900	chaperone protein ClpB1-like	522	20	0	82.33
TraesCS2D02G139100	(S)-beta-bisabolene synthase	607	20	0	78.79
TraesCS2D02G139500	protein SSUH2 homolog	466	20	0	85.4
TraesCS2D02G146100	bZIP transcription factor 60	572	20	0	82.77
TraesCS2D02G146500	probable carboxylesterase 18	354	20	0	80.53
TraesCS2D02G150500	harpin binding protein 1	277	20	0	86.75
TraesCS2D02G151500	berberine bridge enzyme-like 18	529	20	0	86.62
TraesCS2D02G154300	1-Cys peroxiredoxin PER1	200	20	1.34e-144	86.3
TraesCS2D02G159100	solute carrier family 25 member 44	331	20	0	95.03
TraesCS2D02G163300	Ribonuclease 1	241	20	0	79.29
TraesCS2D02G163900	transcription factor bHLH47-like	259	20	0	79.75
TraesCS2D02G164400	Lipase/lipooxygenase PLAT/LH2 family protein	424	20	0	85.46
TraesCS2D02G165600	Subtilisin-chymotrypsin inhibitor-2B	68	20	1.19e-42	84.78
TraesCS2D02G165800	Subtilisin-chymotrypsin inhibitor-2B	68	20	1.53e-39	87.5
TraesCS2D02G173000	fasciclin-like arabinogalactan protein 1	310	20	0	70.89
TraesCS2D02G174500	protein STRUBBELIG-RECEPTOR FAMILY 7	760	20	0	89.06
TraesCS2D02G177900	protein STRICTOSIDINE SYNTHASE-LIKE 4	322	20	0	86.25
TraesCS2D02G180900	hypothetical protein BRADI_1g21922v3	411	4	2.96e-117	62.38
TraesCS2D02G181000	cytosolic sulfotransferase 5	339	20	0	81.87
TraesCS2D02G183700	ninja-family protein 5	310	20	0	80.41
TraesCS2D02G185400	putative anthocyanidin reductase	267	20	0	76.51
TraesCS2D02G189900	protein CHROMATIN REMODELING 35	952	20	0	83.6
TraesCS2D02G194400	U-box domain-containing protein 4	361	20	0	94.77
TraesCS2D02G199100	Polyol transporter 5	514	20	0	90.75
TraesCS2D02G206900	remorin 4.1	309	20	0	78.3
TraesCS2D02G211000	F-box domain-containing protein	164	20	1.24e-116	84.31
TraesCS2D02G211100	organic cation/carnitine transporter 2-like	527	20	0	87.88
TraesCS2D02G211200	myosin-1 isoform X1	884	20	0	92.4
TraesCS2D02G217100	probable mixed-linked glucan synthase 3	847	20	0	88.26
TraesCS2D02G217200	probable mixed-linked glucan synthase 3	870	20	0	81.35
TraesCS2D02G231100	probable 5'-adenylylsulfate reductase 1, chloroplastic	369	20	0	93.03
TraesCS2D02G253300	187-kDa microtubule-associated protein AIR9	1655	20	0	90.5
TraesCS2D02G254500	uncharacterized oxidoreductase At1g06690, chloroplastic-like	371	20	0	90.8
TraesCS2D02G257100	glycine-rich cell wall structural protein-like	141	20	4.77e-94	78.47
TraesCS2D02G259300	mitogen-activated protein kinase kinase kinase 5	585	20	0	83.18
TraesCS2D02G260200	predicted protein	109	20	7.15e-73	71.4
TraesCS2D02G264200	sugar transport protein MST3	517	20	0	92.94
TraesCS2D02G264400	probable NAD(P)H dehydrogenase (quinone) FQR1-like 1	204	20	9.3e-148	95.34
TraesCS2D02G266600	potassium transporter 22	878	20	0	84.06
TraesCS2D02G267100	predicted protein	136	20	1.97e-92	58.96
TraesCS2D02G268600	flowering-promoting factor 1-like protein 4	109	20	6.28e-76	92.01
TraesCS2D02G270300	transcription factor bHLH35	278	20	0	77.6
TraesCS2D02G276000	70 kDa peptidyl-prolyl isomerase	550	20	0	93.4
TraesCS2D02G281700	unnamed protein product	280	20	0	86.04
TraesCS2D02G283000	protein NUCLEAR FUSION DEFECTIVE 4	593	20	0	91.63
TraesCS2D02G288200	NAD(P)-binding Rossmann-fold superfamily protein	310	20	0	89.68
TraesCS2D02G295000	non-specific lipid-transfer protein	126	20	5.01e-76	90.07
TraesCS2D02G296700	U-box domain-containing protein 27	441	20	0	88.17
TraesCS2D02G298100	probable plastid-lipid-associated protein 7, chloroplastic	256	20	0	83.55
TraesCS2D02G300000	RNA-binding motif protein, X-linked-like-3	226	20	1.91e-144	65.64
TraesCS2D02G300100	RNA-binding motif protein, X-linked-like-3	262	20	2.08e-176	76.95
TraesCS2D02G301400	PI-PLC X domain-containing protein At5g67130-like	406	20	0	89.45
TraesCS2D02G303800	seed biotin-containing protein SBP65	556	20	0	76.17
TraesCS2D02G308000	two-component response regulator ORR1-like	220	20	1.12e-162	82.7
TraesCS2D02G308100	chloride channel protein CLC-c	805	20	0	94.31
TraesCS2D02G311100	ferric reduction oxidase 7, chloroplastic	747	20	0	87.08
TraesCS2D02G311500	enzyme of the cupin superfamily	135	20	2.62e-96	88.8
TraesCS2D02G313400	putative lipoxygenase 5	910	20	0	92.57
TraesCS2D02G314900	Zeaxanthin epoxidase, chloroplastic	498	20	0	95.59
TraesCS2D02G316200	predicted protein	218	20	1.89e-157	66.13
TraesCS2D02G324000	black hull 4	425	20	0	89.76
TraesCS2D02G331200	ATP-dependent 6-phosphofructokinase 2	469	20	0	92.55
TraesCS2D02G335300	copper methylamine oxidase	719	20	0	97.72
TraesCS2D02G338900	protein JINGUBANG	442	20	0	82.02
TraesCS2D02G339900	BTB/POZ and TAZ domain-containing protein 2	339	20	0	83.8
TraesCS2D02G343000	F-box protein SKIP14	578	20	0	66.5
TraesCS2D02G346600	PTI1-like tyrosine-protein kinase 3	369	20	0	86.58
TraesCS2D02G346900	phosphoglycolate phosphatase 1B, chloroplastic	355	20	0	89.6
TraesCS2D02G348600	protein NRT1/ PTR FAMILY 4.6	559	20	0	87.57
TraesCS2D02G349100	F-box protein At1g78280	807	20	0	90.13
TraesCS2D02G356500	Leucine-rich repeat family protein	610	20	0	90.88
TraesCS2D02G356600	calmodulin-binding receptor-like cytoplasmic kinase 3	365	20	0	86.27
TraesCS2D02G356900	adenine phosphoribosyltransferase 2	206	20	2.05e-146	91.54
TraesCS2D02G364500	TPA_inf: caleosin	242	20	0	88.18
TraesCS2D02G368600	probable beta-D-xylosidase 6	772	20	0	90.4
TraesCS2D02G369900	ethylene-responsive transcription factor ERF053	455	20	0	71.86
TraesCS2D02G371300	Endosomal targeting BRO1-like domain-containing protein	417	20	0	91.38
TraesCS2D02G371700	GEM-like protein 4	235	20	4.31e-173	92.87
TraesCS2D02G372000	cytosolic sulfotransferase 8	341	20	0	82.66
TraesCS2D02G373800	probable metal-nicotianamine transporter YSL12	721	20	0	89.92
TraesCS2D02G374400	UDP-glycosyltransferase 73C6-like	495	20	0	86.14
TraesCS2D02G374500	UDP-glycosyltransferase 73D1	486	20	0	87.14
TraesCS2D02G376100	aquaporin PIP2-5	290	20	0	95.66
TraesCS2D02G377500	phenylalanine ammonia-lyase-like	713	20	0	96.8
TraesCS2D02G377600	phenylalanine ammonia-lyase-like	709	20	0	97.08
TraesCS2D02G378900	protein G1-like4	201	20	4.33e-146	90.85
TraesCS2D02G380800	disease resistance protein RPS2-like isoform X1	768	20	0	85.32
TraesCS2D02G381200	probable inactive beta-glucosidase 14 isoform X1	415	20	0	87.2
TraesCS2D02G382600	beta-fructofuranosidase 1	660	20	0	85.54
TraesCS2D02G386300	B-box zinc finger protein 20-like isoform X2	261	20	0	80.3
TraesCS2D02G387300	homeobox-leucine zipper protein HOX22	243	20	1.95e-180	80.09
TraesCS2D02G391700	OSJNBa0088A01.13-like protein	171	20	3.49e-121	71.9
TraesCS2D02G392200	heavy metal-associated isoprenylated plant protein 28	123	20	1.5e-88	79.16
TraesCS2D02G394200	1-aminocyclopropane-1-carboxylate synthase-like	486	20	0	91.6
TraesCS2D02G396700	SPX domain-containing membrane protein OsI_17046	700	20	0	92.38
TraesCS2D02G401000	Transducin/WD40 repeat-like superfamily protein	1023	20	0	89.38
TraesCS2D02G401600	Niemann-Pick C1 protein-like	1263	20	0	93.72
TraesCS2D02G409400	putative glucuronosyltransferase PGSIP8	473	20	0	95.08
TraesCS2D02G414600	ethylene-responsive transcription factor 2	289	20	0	79.71
TraesCS2D02G415700	probable LRR receptor-like serine/threonine-protein kinase At1g56130	1013	20	0	90.5
TraesCS2D02G417100	predicted protein	295	20	0	87.83
TraesCS2D02G423400	acyclic sesquiterpene synthase-like isoform X2	642	20	0	82.21
TraesCS2D02G423500	acyclic sesquiterpene synthase-like isoform X2	600	20	0	81.39
TraesCS2D02G423700	vacuolar-sorting receptor 7	641	20	0	85.92
TraesCS2D02G425700	ethylene-responsive transcription factor 4	217	20	2.87e-148	78.77
TraesCS2D02G428400	probable cation transporter HKT7	445	20	0	81.68
TraesCS2D02G428500	putative sodium transporter	457	20	0	80.56
TraesCS2D02G431500	putative xyloglucan endotransglucosylase/hydrolase protein 13	314	20	0	78.11
TraesCS2D02G432600	probable plastid-lipid-associated protein 12, chloroplastic	398	20	0	86.88
TraesCS2D02G432700	predicted protein	94	20	5.96e-64	81.87
TraesCS2D02G433700	pectin acetylesterase 7	393	20	0	87.35
TraesCS2D02G436200	ubiquinol oxidase 2, mitochondrial-like	326	20	0	88.39
TraesCS2D02G442100	putative wall-associated receptor kinase-like protein	760	20	0	70.62
TraesCS2D02G449400	methylesterase 7-like isoform X2	263	20	0	85.88
TraesCS2D02G451100	putative ABC transporter C family member 15	1586	20	0	93.15
TraesCS2D02G452900	receptor-like protein kinase FERONIA	511	20	0	79.36
TraesCS2D02G453100	predicted protein	110	20	4.25e-76	75.91
TraesCS2D02G453200	protein MARD1-like	93	20	1.92e-63	87.85
TraesCS2D02G453300	protein MARD1-like	125	20	2.64e-45	83.49
TraesCS2D02G453400	protein MARD1-like	92	20	6.96e-63	85.48
TraesCS2D02G453500	protein MARD1-like	100	20	6.83e-69	86.33
TraesCS2D02G453600	protein MARD1-like	93	20	6.21e-63	88.97
TraesCS2D02G453800	predicted protein	98	20	8.17e-67	89.08
TraesCS2D02G456500	putative E3 ubiquitin-protein ligase LIN	960	20	0	79.16
TraesCS2D02G456900	protein REVEILLE 7-like	416	20	0	65.31
TraesCS2D02G461500	gamma-soluble NSF attachment protein	298	20	0	92.7
TraesCS2D02G464200	indolin-2-one monooxygenase	534	20	0	77.42
TraesCS2D02G467300	probable polyamine oxidase 2	484	20	0	96.42
TraesCS2D02G467500	pectinesterase inhibitor 8	181	20	3.31e-128	78.99
TraesCS2D02G468900	soluble starch synthase III-1	1332	20	0	87.95
TraesCS2D02G480100	importin subunit beta-1-like	930	20	0	62.98
TraesCS2D02G484200	probable metal-nicotianamine transporter YSL6	642	20	0	88.47
TraesCS2D02G484300	putative metal-nicotianamine transporter YSL6	268	20	0	92.71
TraesCS2D02G489200	beta-fructofuranosidase, insoluble isoenzyme 7-like	587	20	0	86.09
TraesCS2D02G490400	agmatine coumaroyltransferase	441	20	0	90.41
TraesCS2D02G491000	cytochrome P450 76C2	506	20	0	85.74
TraesCS2D02G492200	U11/U12 small nuclear ribonucleoprotein 25 kDa protein	175	20	1.83e-129	92.65
TraesCS2D02G492300	PHD finger-like domain-containing protein 5B	110	14	2.66e-77	84.61
TraesCS2D02G493400	flavanone 3-hydroxylase	378	20	0	94.81
TraesCS2D02G493700	serine/threonine-protein kinase SAPK1	342	20	0	95.59
TraesCS2D02G502300	predicted protein	462	20	0	79.43
TraesCS2D02G502700	universal stress protein A-like protein	162	20	5.09e-117	82.75
TraesCS2D02G504700	protein SRC2 homolog	149	13	5.1e-97	78.95
TraesCS2D02G511800	probable isoaspartyl peptidase/L-asparaginase 2	333	20	0	97
TraesCS2D02G512100	probable isoaspartyl peptidase/L-asparaginase 2	333	20	0	96.46
TraesCS2D02G513600	Oryzain alpha chain	463	20	0	92.89
TraesCS2D02G515400	glycine-rich cell wall structural protein-like	152	6	7.57e-18	73.96
TraesCS2D02G515500	probable H/ACA ribonucleoprotein complex subunit 1	151	4	1.39e-74	77.31
TraesCS2D02G515900	dehydration responsive element binding protein	239	20	6.91e-174	78.19
TraesCS2D02G524200	predicted protein	107	15	1.44e-69	84.05
TraesCS2D02G527800	phenolic glucoside malonyltransferase 2-like	441	20	0	82.84
TraesCS2D02G531000	3-oxoacyl-[acyl-carrier-protein] reductase FabG	279	20	0	87.33
TraesCS2D02G537700	G-type lectin S-receptor-like serine/threonine-protein kinase B120 isoform X1	814	20	0	88.36
TraesCS2D02G540500	heavy metal-associated isoprenylated plant protein 39-like	145	20	7.75e-100	71.69
TraesCS2D02G541900	putative thiol-disulfide oxudoreductase DCC	214	20	1.01e-157	85.85
TraesCS2D02G542500	predicted protein	488	20	0	68.71
TraesCS2D02G542600	ubiquinol oxidase 4, chloroplastic/chromoplastic	333	20	0	82.22
TraesCS2D02G543900	ethylene-responsive transcription factor 7	193	20	5.57e-134	66.63
TraesCS2D02G547400	geraniol 8-hydroxylase-like	499	20	0	86.24
TraesCS2D02G547900	putative phytol kinase, chloroplastic	300	20	0	84.13
TraesCS2D02G549300	putative polyamine oxidase 2	540	20	0	92.53
TraesCS2D02G552100	putative vacuolar defense protein	164	20	7.48e-121	89.9
TraesCS2D02G552200	two-component response regulator ORR6	176	20	5.23e-125	91.02
TraesCS2D02G557900	probable acyl-activating enzyme 5, peroxisomal	601	20	0	93.5
TraesCS2D02G563600	protochlorophyllide reductase A, chloroplastic	388	20	0	92.01
TraesCS2D02G565300	probable allantoinase	505	20	0	94.29
TraesCS2D02G568200	tryptamine benzoyltransferase 1-like	430	20	0	84.94
TraesCS2D02G571600	predicted protein	112	20	9.07e-75	81.69
TraesCS2D02G571700	FT-interacting protein 1	1054	20	0	85.48
TraesCS2D02G575800	probable 1-deoxy-D-xylulose-5-phosphate synthase 2, chloroplastic	713	20	0	93.3
TraesCS2D02G583000	cationic peroxidase SPC4	341	20	0	82.41
TraesCS2D02G583200	cationic peroxidase SPC4	341	20	0	83.55
TraesCS2D02G590200	mpv17 / PMP22 family protein	320	20	0	85.43
TraesCS2D02G594400	HGL1C_WHEATRecName: Full=4-hydroxy-7-methoxy-3-oxo-3,4-dihydro-2H-1,4-benzoxazin-2-yl glucoside beta-D-glucosidase 1c, chloroplastic; AltName: Full=Beta-glucosidase 1c; Short=Taglu1c; Flags: Precursor	570	20	0	87.26
TraesCS2D02G596000	exocyst complex component EXO70A1	637	20	0	93.63
TraesCS2D02G597900	AT-hook motif nuclear-localized protein 9-like	405	20	0	75.24
TraesCS2D02G598000	probable phospholipid hydroperoxide glutathione peroxidase	171	20	2.52e-124	88.98
TraesCS2D02G598500	oxalate--CoA ligase	531	20	0	86.18
TraesCS2D02G599700	E3 ubiquitin-protein ligase AIRP2-like	259	20	0	92.27
TraesCS2D02G600100	stem-specific protein TSJT1	264	20	0	85.02
TraesCS3A02G016800	probable LRR receptor-like serine/threonine-protein kinase At3g47570 isoform X1	436	20	0	79.37
TraesCS3A02G024200	predicted protein	266	20	0	87.45
TraesCS3A02G025300	GDSL esterase/lipase At3g26430	393	20	0	85.92
TraesCS3A02G025400	GDSL esterase/lipase At3g26430	388	20	0	85.59
TraesCS3A02G025900	obtusifoliol 14-alpha demethylase-like	508	20	0	86.73
TraesCS3A02G036600	Plastidic glucose transporter 4	554	20	0	93.8
TraesCS3A02G038300	probable calcium-binding protein CML16	186	20	4.1e-126	84.85
TraesCS3A02G039800	Receptor-like protein 12	305	20	7.71e-123	68.22
TraesCS3A02G040800	basic 7S globulin	349	20	0	75.2
TraesCS3A02G041200	ethylene-responsive transcription factor ERF118-like	350	20	0	78.09
TraesCS3A02G046000	Bowman-Birk type trypsin inhibitor	175	20	2.67e-120	75.95
TraesCS3A02G046100	Bowman-Birk type trypsin inhibitor	173	20	3.31e-105	75
TraesCS3A02G046200	Bowman-Birk type trypsin inhibitor	204	20	1.07e-118	64.03
TraesCS3A02G061600	predicted protein	514	20	0	87.97
TraesCS3A02G076300	probable folate-biopterin transporter 8, chloroplastic	388	20	0	93.5
TraesCS3A02G077100	asparagine synthetase	537	20	0	94.7
TraesCS3A02G081300	light-induced protein 1-like	151	20	1.36e-63	65.71
TraesCS3A02G084500	Peptidase family M48 family protein	327	20	0	88.66
TraesCS3A02G087300	2-alkenal reductase (NADP(+)-dependent)	353	20	0	86.38
TraesCS3A02G091000	predicted protein	501	20	0	73.28
TraesCS3A02G092800	galactinol--sucrose galactosyltransferase	782	20	0	90.45
TraesCS3A02G093900	subtilisin-chymotrypsin inhibitor CI-1B-like	71	20	1.51e-43	82.58
TraesCS3A02G097800	probable staphylococcal-like nuclease CAN1	426	20	0	79.57
TraesCS3A02G101800	L-type lectin-domain containing receptor kinase IV.1	672	20	0	87.46
TraesCS3A02G102800	hexose carrier protein HEX6-like	510	20	0	84.98
TraesCS3A02G104100	predicted protein	157	9	1.53e-66	65.25
TraesCS3A02G105400	BTB/POZ domain and ankyrin repeat-containing protein NPR1	577	20	0	87.74
TraesCS3A02G107200	zinc finger CCCH domain-containing protein 2	384	20	0	86.34
TraesCS3A02G108900	NADP-dependent malic enzyme, chloroplastic	648	20	0	93.64
TraesCS3A02G109300	transcription factor MYBS3	367	20	0	81.51
TraesCS3A02G110100	protodermal factor 1-like	222	20	7.54e-155	83.21
TraesCS3A02G113700	lysine-specific demethylase 4B	875	20	0	67.82
TraesCS3A02G113900	probable galactinol--sucrose galactosyltransferase 2	790	20	0	84.93
TraesCS3A02G116300	protein GIGANTEA	742	20	0	88.23
TraesCS3A02G121300	auxin-responsive protein IAA1	193	20	1.3e-135	76.78
TraesCS3A02G124700	UDP-glucosyl transferase	510	20	0	92.26
TraesCS3A02G125300	Chloride channel protein CLC-c	805	20	0	93.08
TraesCS3A02G129000	ABC transporter C family member 3	1496	20	0	92.36
TraesCS3A02G129300	DCC family protein At1g52590, chloroplastic	193	20	6.81e-139	84.36
TraesCS3A02G129600	embryo-specific protein ATS3A	194	20	1.53e-93	77.83
TraesCS3A02G130300	Phosphoenolpyruvate/phosphate translocator 3, chloroplastic	397	20	0	89.12
TraesCS3A02G134200	phosphoenolpyruvate carboxylase	1003	20	0	92.09
TraesCS3A02G135500	CBL-interacting protein kinase 5	466	20	0	92.32
TraesCS3A02G136300	peroxidase P7-like	327	20	0	86.66
TraesCS3A02G141100	GDSL esterase/lipase At5g45910	376	20	0	90.39
TraesCS3A02G142700	protein DJ-1 homolog A	396	20	0	79.86
TraesCS3A02G146500	predicted protein	84	18	4.06e-52	69.35
TraesCS3A02G147900	predicted protein	281	20	0	82.54
TraesCS3A02G148700	nodulin-related protein 1	156	20	2.13e-101	72.96
TraesCS3A02G150500	GTP binding	520	20	0	88.05
TraesCS3A02G150800	late embryogenesis abundant protein Lea14-A	151	20	9.11e-107	90.23
TraesCS3A02G152500	cytochrome P450 71A1	549	20	0	81.21
TraesCS3A02G152700	cytochrome P450 71A1	532	20	0	79.52
TraesCS3A02G157200	putative ubiquitin-conjugating enzyme E2 38 isoform X1	365	20	0	84.45
TraesCS3A02G167200	predicted protein	571	20	0	85.33
TraesCS3A02G173000	alpha/beta-Hydrolases superfamily protein	725	20	0	82.35
TraesCS3A02G177700	kinesin-like protein KIN-14B	577	20	0	81.15
TraesCS3A02G178600	Protein HOTHEAD	583	20	0	90.46
TraesCS3A02G183800	tonoplast dicarboxylate transporter-like	540	20	0	90.21
TraesCS3A02G185900	Peroxidase 24	338	20	0	86.73
TraesCS3A02G190800	probable anion transporter 1, chloroplastic	522	20	0	87.97
TraesCS3A02G195700	protein LNK2 isoform X2	579	20	0	75.95
TraesCS3A02G199200	hypothetical protein TRIUR3_02338	334	20	0	71.05
TraesCS3A02G201700	hypothetical protein TRIUR3_28377	255	4	7.88e-21	77.35
TraesCS3A02G209200	probable protein phosphatase 2C 6	377	20	0	89.33
TraesCS3A02G209500	myosin-17 isoform X1	1524	20	0	96.71
TraesCS3A02G214400	hypothetical protein TRIUR3_33520	91	1	2.15e-58	98.9
TraesCS3A02G217400	predicted protein	297	20	1.43e-169	65.49
TraesCS3A02G217900	ABC transporter G family member 36	1454	20	0	93.54
TraesCS3A02G224400	Light-sensor Protein kinase	664	20	0	82.11
TraesCS3A02G224600	predicted protein	629	20	0	83.17
TraesCS3A02G225100	S-type anion channel SLAH2 isoform X2	681	20	0	84.62
TraesCS3A02G225800	polygalacturonase precursor	539	20	0	90.59
TraesCS3A02G226600	Dihydroflavonol-4-reductase	354	20	0	98.9
TraesCS3A02G227700	urophorphyrin methylase 1	386	20	0	90.53
TraesCS3A02G228200	cytochrome P450 72A13	531	20	0	91.59
TraesCS3A02G229400	Protein DETOXIFICATION 14	394	20	0	91.64
TraesCS3A02G229700	cinnamoyl-CoA reductase-like SNL6	369	20	0	89.79
TraesCS3A02G230000	beta-carbonic anhydrase 1b	254	20	0	89.47
TraesCS3A02G231000	probable isoprenylcysteine alpha-carbonyl methylesterase ICMEL2 isoform X1	351	20	0	93.85
TraesCS3A02G236500	Transducin/WD40 repeat-like superfamily protein	1325	20	0	90.04
TraesCS3A02G237400	probable plastid-lipid-associated protein 14, chloroplastic	628	20	0	86.33
TraesCS3A02G237800	probable protein phosphatase 2C 8	394	20	0	82.06
TraesCS3A02G238000	Myosin heavy chain-like	1322	20	0	78.79
TraesCS3A02G239200	Acidic endochitinase	299	20	0	85.34
TraesCS3A02G241000	mannan endo-1,4-beta-mannosidase 1	425	20	0	86.46
TraesCS3A02G244400	putative methyltransferase DDB_G0268948	261	20	0	92.2
TraesCS3A02G244600	probable choline kinase 2 isoform X2	360	20	0	91.1
TraesCS3A02G246600	fasciclin-like arabinogalactan protein 11	245	20	3.44e-172	84.61
TraesCS3A02G248000	alpha-amylase 3, chloroplastic	871	20	0	88.02
TraesCS3A02G249000	probable protein phosphatase 2C 50	386	20	0	86.52
TraesCS3A02G249800	predicted protein	267	7	1.15e-77	60.79
TraesCS3A02G250200	glycine dehydrogenase (decarboxylating), mitochondrial	1031	20	0	96.16
TraesCS3A02G250700	probable polyamine oxidase 5	510	20	0	82.57
TraesCS3A02G252900	transcription factor bHLH13-like	459	20	0	80.72
TraesCS3A02G253200	WSI18 protein	200	20	4.19e-113	75.74
TraesCS3A02G255300	Bidirectional sugar transporter SWEET2b	231	20	1.54e-165	88.98
TraesCS3A02G256300	mitogen-activated protein kinase kinase kinase 18	481	20	0	79.72
TraesCS3A02G257500	ABC transporter B family member 4	1257	20	0	93.92
TraesCS3A02G258000	ABC transporter B family member 4	1326	20	0	94.01
TraesCS3A02G260100	endochitinase	318	20	0	96.86
TraesCS3A02G260200	class I chitinase	319	20	0	96.96
TraesCS3A02G262100	LEAF RUST 10 DISEASE-RESISTANCE LOCUS RECEPTOR-LIKE PROTEIN KINASE-like 1.2 isoform X3	694	20	0	76.51
TraesCS3A02G265900	D-glycerate 3-kinase, chloroplastic	417	20	0	91
TraesCS3A02G266800	O-acyltransferase WSD1	516	20	0	84.19
TraesCS3A02G267400	cyclase/dehydrase, putative, expressed	230	20	3.37e-168	82.47
TraesCS3A02G275400	Histidine-containing phosphotransfer protein 4	151	20	5.46e-110	92.83
TraesCS3A02G275600	NADP-dependent malic enzyme	568	20	0	94.93
TraesCS3A02G276200	Receptor-like protein kinase HSL1	1055	20	0	78.47
TraesCS3A02G276500	auxin-responsive protein IAA6-like isoform X1	341	20	0	82.82
TraesCS3A02G279100	Anthocyanidin 5,3-O-glucosyltransferase	504	20	0	74.79
TraesCS3A02G280000	anthocyanidin 5,3-O-glucosyltransferase-like	500	20	0	84.22
TraesCS3A02G280800	Heat stress transcription factor C-1b	236	20	1.57e-174	82.12
TraesCS3A02G282100	chaperone protein dnaJ C76, chloroplastic	340	20	0	91.67
TraesCS3A02G283800	predicted protein	123	20	4.03e-84	64.91
TraesCS3A02G287500	inorganic pyrophosphatase 1	275	20	0	88.04
TraesCS3A02G291900	transcription factor VOZ1	638	20	0	85.24
TraesCS3A02G297200	peroxidase 2-like	355	20	0	84.68
TraesCS3A02G298300	predicted protein	808	20	0	90.63
TraesCS3A02G298800	BTB/POZ domain and ankyrin repeat-containing protein NPR2	618	20	0	88.18
TraesCS3A02G303600	triacylglycerol lipase SDP1	1032	20	0	88.56
TraesCS3A02G315800	diacylglycerol kinase 5	317	20	0	89.2
TraesCS3A02G321000	jacalin-related lectin 3	451	20	0	85.54
TraesCS3A02G321100	cytokinin dehydrogenase 5	530	20	0	90.24
TraesCS3A02G321400	myosin-binding protein 1	874	20	0	74.13
TraesCS3A02G327100	probable nucleoredoxin 2	392	20	0	89.89
TraesCS3A02G328000	predicted protein	247	20	4.66e-175	89.8
TraesCS3A02G330900	probable E3 ubiquitin-protein ligase RHC1A	403	20	0	76.58
TraesCS3A02G340900	Protein LURP-one-related 8	277	20	0	86.65
TraesCS3A02G342900	trans-cinnamate 4-monooxygenase	506	20	0	94.54
TraesCS3A02G344800	expansin Os-EXPA2	251	20	0	93.71
TraesCS3A02G345200	predicted protein	173	15	2.08e-126	87.34
TraesCS3A02G346700	amino acid transporter AVT6C isoform X2	450	20	0	89.21
TraesCS3A02G347800	protein RETICULATA-RELATED 5, chloroplastic-like	720	20	0	91.37
TraesCS3A02G354800	ankyrin repeat-containing protein NPR4	555	20	0	93.4
TraesCS3A02G355400	plant-specific domain TIGR01589 family protein expressed	95	20	1.8e-66	86.08
TraesCS3A02G358800	ENTH/VHS family protein	256	20	4.97e-162	79.34
TraesCS3A02G359000	protein ESMERALDA 1 isoform X1	568	20	0	90.87
TraesCS3A02G360500	photosystem II reaction center PSB28 protein, chloroplastic	209	20	4.77e-131	86.15
TraesCS3A02G362200	probable protein phosphatase 2C 9	391	20	0	83.36
TraesCS3A02G362800	ultraviolet-B receptor UVR8	328	20	0	89.24
TraesCS3A02G363400	Aldo-keto reductase family 4 member C10	311	20	0	95.03
TraesCS3A02G363700	delta-1-pyrroline-5-carboxylate synthase 2	764	20	0	94.99
TraesCS3A02G365600	heme-binding-like protein At3g10130, chloroplastic	225	20	3.3e-157	83.1
TraesCS3A02G367900	uncharacterized acetyltransferase At3g50280-like	493	20	0	89.83
TraesCS3A02G375100	predicted protein	188	20	9.63e-131	79.71
TraesCS3A02G375500	transcription factor DIVARICATA	179	20	1.24e-106	81.93
TraesCS3A02G376800	protein EARLY RESPONSIVE TO DEHYDRATION 15-like	151	20	2.69e-102	65.57
TraesCS3A02G381000	photosystem II 22 kDa protein, chloroplastic	271	20	0	89.39
TraesCS3A02G383500	amidophosphoribosyltransferase, chloroplastic-like	550	20	0	89.69
TraesCS3A02G388200	receptor protein-tyrosine kinase CEPR2	677	20	0	88.87
TraesCS3A02G390000	F-box protein interaction domain containing protein	354	20	0	84.12
TraesCS3A02G391400	E3 ubiquitin-protein ligase AIRP2	251	20	0	90.93
TraesCS3A02G392900	protein NRT1/ PTR FAMILY 8.1-like	557	20	0	87.9
TraesCS3A02G394600	U-box domain-containing protein 45	798	20	0	92.07
TraesCS3A02G398500	predicted protein	599	20	0	86.09
TraesCS3A02G400000	fructokinase-1	323	20	0	95.19
TraesCS3A02G400400	BTB/POZ and TAZ domain-containing protein 3	247	20	1.09e-161	81.33
TraesCS3A02G402000	predicted protein	263	20	4.68e-175	87.61
TraesCS3A02G405900	zinc finger CCCH domain-containing protein 19-like isoform X1	857	20	0	78.25
TraesCS3A02G406000	NAC domain-containing protein 48	299	20	0	90.1
TraesCS3A02G414300	proline transporter 1	413	20	0	85.94
TraesCS3A02G416800	predicted protein	92	20	1.9e-61	77.79
TraesCS3A02G417100	ABC transporter B family member 26, chloroplastic	678	20	0	92.53
TraesCS3A02G418400	thioredoxin F, chloroplastic	189	20	8.18e-135	81.04
TraesCS3A02G436100	transcription factor TCP20	341	20	0	77.61
TraesCS3A02G438000	delta(3,5)-Delta(2,4)-dienoyl-CoA isomerase, peroxisomal	290	20	0	94.08
TraesCS3A02G444000	fertility-related ORF3 protein	439	20	0	66.91
TraesCS3A02G444100	predicted protein	378	20	0	72.29
TraesCS3A02G447500	beta-glucosidase 5-like	504	20	0	86.3
TraesCS3A02G457700	Protein SRG1	370	20	0	87.46
TraesCS3A02G471700	xylanase inhibitor	368	20	0	84.96
TraesCS3A02G471900	xylanase inhibitor	401	20	0	93.96
TraesCS3A02G480400	beta 1,3 glucanase	334	20	0	88.53
TraesCS3A02G483000	glucan endo-1,3-beta-D-glucosidase	334	20	0	97.03
TraesCS3A02G489500	protein IRON-RELATED TRANSCRIPTION FACTOR 2	238	20	2.04e-176	81.2
TraesCS3A02G489600	protein IRON-RELATED TRANSCRIPTION FACTOR 2	245	20	7.13e-177	78
TraesCS3A02G489700	protein IRON-RELATED TRANSCRIPTION FACTOR 2	247	20	0	80.81
TraesCS3A02G494800	predicted protein	561	20	0	78.57
TraesCS3A02G498700	phospholipase A1-Igamma1, chloroplastic	540	20	0	80.67
TraesCS3A02G506000	predicted protein	317	20	0	69.68
TraesCS3A02G508600	3-oxo-Delta(4,5)-steroid 5-beta-reductase	393	20	0	89.94
TraesCS3A02G510100	Abscisic stress-ripening protein 1	219	20	1.26e-155	74.97
TraesCS3A02G512400	serine decarboxylase 1	481	20	0	88.02
TraesCS3A02G515300	Glutamate decarboxylase	501	20	0	91.27
TraesCS3A02G516500	Protein COFACTOR ASSEMBLY OF COMPLEX C SUBUNIT B CCB3, chloroplastic	192	14	4.02e-117	76.6
TraesCS3A02G516600	ABC transporter D family member 1	504	20	0	89.04
TraesCS3A02G516700	protein phosphatase 1 regulatory subunit SDS22	464	20	0	79.41
TraesCS3A02G517100	Barwin, putative, expressed	146	20	1.32e-105	95.15
TraesCS3A02G518200	predicted protein	315	20	8.76e-152	63.35
TraesCS3A02G526600	PHYTOCLOCK 1	285	20	0	93.79
TraesCS3A02G528800	vacuolar-processing enzyme	475	20	0	93.5
TraesCS3A02G528900	Vacuolar-processing enzyme	475	20	0	92.95
TraesCS3A02G534900	caffeic acid O-methyltransferase	356	20	0	94.61
TraesCS3A02G535300	probable aquaporin TIP1-2	252	20	1.04e-176	95.8
TraesCS3B02G003200	predicted protein	210	20	4.12e-155	84.45
TraesCS3B02G004200	subtilisin-like protease SBT3.10	754	20	0	81.59
TraesCS3B02G006300	leucine-rich repeat extensin-like protein 3	188	13	1.32e-102	71.58
TraesCS3B02G006500	60S ribosomal protein L9	189	20	2.66e-138	95.93
TraesCS3B02G007200	60S ribosomal protein L9	189	20	3.13e-138	96.11
TraesCS3B02G018800	predicted protein	545	20	0	90.15
TraesCS3B02G019900	serine-arginine rich protein	260	20	1.37e-171	85.54
TraesCS3B02G034800	UDP-glycosyltransferase 72B3	473	20	0	86.13
TraesCS3B02G037000	Bowman-Birk type trypsin inhibitor	181	20	1.12e-125	73.18
TraesCS3B02G038700	Bowman-Birk type trypsin inhibitor	182	20	7.86e-129	76.1
TraesCS3B02G041700	alpha-xylosidase 1	945	20	0	90.78
TraesCS3B02G041900	indole-3-glycerol phosphate lyase, chloroplastic	295	20	0	89.46
TraesCS3B02G045500	probable calcium-binding protein CML16	187	20	4.02e-134	84.06
TraesCS3B02G047300	Plastidic glucose transporter 4	556	20	0	93.61
TraesCS3B02G048800	17.9 kDa heat shock protein 2	165	20	1.01e-117	85.39
TraesCS3B02G068500	nicotianamine synthase	180	20	4.17e-128	93.34
TraesCS3B02G081500	disease resistance protein RGA2	871	20	0	82.14
TraesCS3B02G090200	probable folate-biopterin transporter 8, chloroplastic	502	20	0	91.79
TraesCS3B02G091400	Premnaspirodiene oxygenase	507	20	0	91.64
TraesCS3B02G093100	ricin B-like lectin R40G3	353	20	0	77.22
TraesCS3B02G096500	light-induced protein 1-like	116	20	1.07e-58	65.87
TraesCS3B02G096600	serine/threonine-protein phosphatase PP1	327	20	0	73.85
TraesCS3B02G098700	chaperone protein dnaJ 20, chloroplastic	188	20	6.93e-136	77.89
TraesCS3B02G099400	Peptidase family M48 family protein	252	20	0	87.77
TraesCS3B02G099900	cytochrome P450 704C1-like	507	20	0	90.27
TraesCS3B02G101300	(S)-beta-macrocarpene synthase	501	20	0	78.51
TraesCS3B02G104500	protein BREAST CANCER SUSCEPTIBILITY 2 homolog B isoform X1	833	20	0	76.89
TraesCS3B02G108000	galactinol--sucrose galactosyltransferase	782	20	0	91.35
TraesCS3B02G112300	cysteine-rich receptor-like protein kinase 2	489	20	0	82.23
TraesCS3B02G118300	7-deoxyloganetin glucosyltransferase-like	498	20	0	88.9
TraesCS3B02G125500	transcription factor MYB1R1-like	300	20	0	74.05
TraesCS3B02G125600	zinc finger CCCH domain-containing protein 2	387	20	0	85.79
TraesCS3B02G126800	transcription factor RAX2	270	20	0	75.64
TraesCS3B02G127400	auxin-responsive protein IAA2-like	230	20	3.06e-165	71.95
TraesCS3B02G129200	protodermal factor 1-like	230	20	1.41e-165	82.08
TraesCS3B02G133400	probable galactinol--sucrose galactosyltransferase 2	756	20	0	89.23
TraesCS3B02G135400	protein GIGANTEA	1125	20	0	93.53
TraesCS3B02G137300	probable serine incorporator	505	20	0	89.95
TraesCS3B02G141200	gibberellin receptor GID1L2	315	20	0	86.06
TraesCS3B02G145500	boron transporter	664	20	0	93.85
TraesCS3B02G148000	predicted protein	109	20	1.25e-75	76.8
TraesCS3B02G148100	ABC transporter C family member 3	1020	20	0	95.89
TraesCS3B02G149200	DUF4050 family protein	189	20	5.69e-141	79.63
TraesCS3B02G166100	gibberellin 2-beta-dioxygenase 1-like	341	20	0	83.57
TraesCS3B02G167900	unnamed protein product	501	20	0	46.3
TraesCS3B02G169300	CBL-interacting protein kinase 5	464	20	0	93.17
TraesCS3B02G173800	predicted protein	82	18	3.98e-51	69.36
TraesCS3B02G179500	cytochrome P450 71A1	529	20	0	81.02
TraesCS3B02G179600	cytochrome P450 71A1-like	532	20	0	79.63
TraesCS3B02G189000	NADH-plastoquinone oxidoreductase subunit 6 (chloroplast)	176	20	7.57e-121	98.69
TraesCS3B02G193500	vesicle-associated membrane protein 721	448	20	0	92.85
TraesCS3B02G197300	probable folate-biopterin transporter 4	500	20	0	91.28
TraesCS3B02G200000	predicted protein	238	20	2.04e-168	80.25
TraesCS3B02G203700	alpha/beta-Hydrolases superfamily protein	727	20	0	81.94
TraesCS3B02G205100	protein SENESCENCE-ASSOCIATED GENE 21, mitochondrial	95	20	1.41e-56	78.19
TraesCS3B02G207300	kinesin-like protein KIN-14B	831	20	0	85.9
TraesCS3B02G213600	tonoplast dicarboxylate transporter-like	540	20	0	89.59
TraesCS3B02G214700	alpha-glucosidase YihQ-like	894	20	0	83.04
TraesCS3B02G220200	probable anion transporter 1, chloroplastic	522	20	0	87.7
TraesCS3B02G227900	protein LNK2 isoform X2	575	20	0	76.51
TraesCS3B02G233000	Vacuolar-processing enzyme	396	20	0	93.09
TraesCS3B02G233700	transcription factor bHLH87	469	20	0	71.77
TraesCS3B02G234200	probable protein phosphatase 2C 5 isoform X1	410	20	0	88.53
TraesCS3B02G239400	protein ALP1-like	530	20	0	83.24
TraesCS3B02G240000	probable protein phosphatase 2C 6	479	20	0	91.1
TraesCS3B02G247700	predicted protein	295	20	0	63.62
TraesCS3B02G248400	ABC transporter G family member 36	1454	20	0	93.7
TraesCS3B02G252400	probable aldo-keto reductase 1	341	20	0	92.93
TraesCS3B02G254700	S-type anion channel SLAH2 isoform X2	619	20	0	85.22
TraesCS3B02G256300	cytochrome P450 72A13	424	20	0	90.48
TraesCS3B02G256800	urophorphyrin methylase 1	386	20	0	90.42
TraesCS3B02G257800	SNF1-related protein kinase regulatory subunit gamma-1	402	20	0	83.42
TraesCS3B02G257900	dihydroflavonol-4-reductase	359	20	0	99
TraesCS3B02G259000	cinnamoyl-CoA reductase-like SNL6	372	20	0	88.57
TraesCS3B02G259300	beta-carbonic anhydrase 1b	254	20	0	88.06
TraesCS3B02G260300	probable isoprenylcysteine alpha-carbonyl methylesterase ICMEL2 isoform X1	385	20	0	86.52
TraesCS3B02G266000	probable plastid-lipid-associated protein 14, chloroplastic	518	20	0	89.39
TraesCS3B02G266500	Myosin heavy chain-like	1318	20	0	78.23
TraesCS3B02G269700	carboxyl-terminal-processing peptidase 1, chloroplastic	423	20	0	82.97
TraesCS3B02G272700	fasciclin-like arabinogalactan protein 11	245	20	8.9e-175	84.24
TraesCS3B02G275400	probable choline kinase 2 isoform X2	358	20	0	91.44
TraesCS3B02G275500	type IV inositol polyphosphate 5-phosphatase 3 isoform X1	671	20	0	86.89
TraesCS3B02G275600	putative methyltransferase DDB_G0268948	307	20	0	92.24
TraesCS3B02G277900	probable protein phosphatase 2C 50	417	20	0	80.02
TraesCS3B02G279700	glycine dehydrogenase (decarboxylating), mitochondrial	1031	20	0	96.09
TraesCS3B02G282500	oxalate oxidase GF-2.8-like	224	20	4.44e-158	95.9
TraesCS3B02G285700	F-box/kelch-repeat protein At1g23390	423	20	0	81.74
TraesCS3B02G290300	ABC transporter B family member 4	1259	20	0	93.9
TraesCS3B02G291700	phosphomethylethanolamine N-methyltransferase-like	504	20	0	95.14
TraesCS3B02G291900	G-type lectin S-receptor-like serine/threonine-protein kinase LECRK1	791	20	0	74.69
TraesCS3B02G293100	serine/arginine-rich-splicing factor SR34 isoform X3	199	20	9.39e-111	84.45
TraesCS3B02G293200	endochitinase	320	20	0	96.98
TraesCS3B02G297200	predicted protein	750	20	0	75.91
TraesCS3B02G299300	D-glycerate 3-kinase, chloroplastic	369	20	0	92.55
TraesCS3B02G300300	predicted protein	515	20	0	83.85
TraesCS3B02G302100	ribosome production factor 1	537	20	0	62.45
TraesCS3B02G313900	anthocyanidin 5,3-O-glucosyltransferase-like	462	20	0	79.24
TraesCS3B02G314600	Heat stress transcription factor C-1b	227	20	1.31e-145	83.64
TraesCS3B02G315800	chaperone protein dnaJ C76, chloroplastic	340	20	0	91.24
TraesCS3B02G317500	predicted protein	118	20	7.26e-82	63.3
TraesCS3B02G320200	NADP-dependent malic enzyme isoform X1	575	20	0	97.81
TraesCS3B02G321400	predicted protein	490	20	0	70.92
TraesCS3B02G326500	transcription factor VOZ1	381	20	0	92.65
TraesCS3B02G330900	Dynein light chain LC6, flagellar outer arm	99	20	1.39e-70	91.06
TraesCS3B02G335000	clp protease adapter protein ClpF, chloroplastic isoform X1	339	20	0	88.7
TraesCS3B02G337400	lysosomal Pro-X carboxypeptidase	515	20	0	91.24
TraesCS3B02G337700	BTB/POZ domain and ankyrin repeat-containing protein NPR2	609	20	0	89.09
TraesCS3B02G342900	signal recognition particle 54 kDa protein 2	484	20	0	88.7
TraesCS3B02G343400	myosin-binding protein 1-like	879	20	0	76.99
TraesCS3B02G344800	jacalin-related lectin 3	451	20	0	85.85
TraesCS3B02G356300	predicted protein	106	20	3.45e-74	68.47
TraesCS3B02G356500	probable nucleoredoxin 2	392	20	0	89.5
TraesCS3B02G357500	predicted protein	243	20	4.47e-173	90.18
TraesCS3B02G359800	nucleotide pyrophosphatase/phosphodiesterase	632	20	0	88.74
TraesCS3B02G360100	probable F-box protein At5g04010	268	20	1.18e-165	75.66
TraesCS3B02G360400	predicted protein	352	20	0	80.62
TraesCS3B02G362900	UDP-glycosyltransferase 87A1	486	20	0	82.1
TraesCS3B02G363000	UDP-glycosyltransferase 87A1	464	20	0	78.75
TraesCS3B02G364700	F-box protein At2g32560-like isoform X2	400	20	0	83.25
TraesCS3B02G365900	calmodulin	144	20	9.62e-85	97.29
TraesCS3B02G368200	Protein RETICULATA-RELATED 3, chloroplastic	349	20	0	88.05
TraesCS3B02G375100	trans-cinnamate 4-monooxygenase	506	20	0	94.5
TraesCS3B02G376800	expansin Os-EXPA2	251	20	0	94.05
TraesCS3B02G377300	predicted protein	173	15	1.1e-125	87.7
TraesCS3B02G378500	Transmembrane amino acid transporter family protein	458	20	0	89.75
TraesCS3B02G381800	predicted protein	389	4	0	59.2
TraesCS3B02G384900	ATP-dependent Clp protease adapter protein CLPS1, chloroplastic	168	20	3.39e-106	69.8
TraesCS3B02G385000	Coatomer subunit delta-3	510	20	0	87.67
TraesCS3B02G388300	plant-specific domain TIGR01589 family protein expressed	96	20	1.01e-67	85.85
TraesCS3B02G390500	osmotin-like protein	250	20	0	83.67
TraesCS3B02G390700	probable mediator of RNA polymerase II transcription subunit 37c	652	20	0	97.08
TraesCS3B02G391800	protein ESMERALDA 1 isoform X1	569	20	0	91.3
TraesCS3B02G392800	photosystem II reaction center PSB28 protein, chloroplastic	182	20	2.41e-133	86.04
TraesCS3B02G394200	transcription factor PCL1-like	225	20	8.29e-116	65.72
TraesCS3B02G394600	probable protein phosphatase 2C 9	428	20	0	77.67
TraesCS3B02G395200	ultraviolet-B receptor UVR8	499	20	0	91.8
TraesCS3B02G395600	Aldo-keto reductase family 4 member C10	311	20	0	95
TraesCS3B02G395900	delta-1-pyrroline-5-carboxylate synthase 2	730	20	0	94.58
TraesCS3B02G397400	heme-binding-like protein At3g10130, chloroplastic	224	20	1.92e-159	82.4
TraesCS3B02G399600	uncharacterized acetyltransferase At3g50280-like	492	20	0	89.68
TraesCS3B02G403400	cytochrome P450 94C1	527	20	0	89.63
TraesCS3B02G407300	predicted protein	193	20	1.23e-140	80.53
TraesCS3B02G409300	protein EARLY RESPONSIVE TO DEHYDRATION 15-like	150	20	1.15e-104	66.24
TraesCS3B02G415900	amidophosphoribosyltransferase, chloroplastic-like	545	20	0	90.09
TraesCS3B02G420500	receptor protein-tyrosine kinase CEPR2	683	20	0	89.59
TraesCS3B02G422300	BAG family molecular chaperone regulator 4-like	162	20	9.01e-117	91.05
TraesCS3B02G423300	E3 ubiquitin-protein ligase AIRP2	251	20	0	90.62
TraesCS3B02G424800	protein NRT1/ PTR FAMILY 8.1-like	551	20	0	88.64
TraesCS3B02G426600	U-box domain-containing protein 45	800	20	0	92.32
TraesCS3B02G428100	protein SENESCENCE-ASSOCIATED GENE 21, mitochondrial	91	20	2.04e-57	72.14
TraesCS3B02G428700	predicted protein	158	20	1.03e-112	82.75
TraesCS3B02G428800	predicted protein	157	20	5.81e-114	82.21
TraesCS3B02G429000	predicted protein	167	20	1.64e-120	81.67
TraesCS3B02G430900	predicted protein	599	20	0	85.73
TraesCS3B02G433400	BTB/POZ and TAZ domain-containing protein 3	400	20	0	83.98
TraesCS3B02G435100	predicted protein	213	20	5.11e-152	88.06
TraesCS3B02G438500	predicted protein	397	20	0	90.62
TraesCS3B02G439600	NAC domain-containing protein 48	298	20	0	90.64
TraesCS3B02G448200	2-carboxy-1,4-naphthoquinone phytyltransferase, chloroplastic isoform X1	188	20	7.54e-100	83.98
TraesCS3B02G451800	predicted protein	91	20	4.03e-60	77.56
TraesCS3B02G452000	ABC transporter B family member 26, chloroplastic	675	20	0	92.39
TraesCS3B02G452500	putative F-box/LRR-repeat protein 23	473	20	0	79.66
TraesCS3B02G453600	thioredoxin F, chloroplastic	189	20	9.2e-137	81.13
TraesCS3B02G453700	putative pentatricopeptide repeat-containing protein At5g37570	519	20	0	81.81
TraesCS3B02G457600	Selenium-binding protein 1	451	20	0	97.19
TraesCS3B02G469600	unnamed protein product	145	20	4.91e-98	77.64
TraesCS3B02G470600	uncharacterized WD repeat-containing protein C17D11.16	482	20	0	80.67
TraesCS3B02G470700	transcription factor TCP20	349	20	0	78.54
TraesCS3B02G472000	delta(3,5)-Delta(2,4)-dienoyl-CoA isomerase, peroxisomal	290	20	0	94.08
TraesCS3B02G481800	potassium transporter 5	782	20	0	92.22
TraesCS3B02G483500	beta-glucosidase 5-like isoform X1	507	20	0	86.17
TraesCS3B02G484200	beta-glucosidase 5-like	512	20	0	85.16
TraesCS3B02G495700	esterase PIR7B-like	275	20	0	88.58
TraesCS3B02G497800	disease resistance protein RGA2-like	967	20	0	79.53
TraesCS3B02G506600	Protein kinase superfamily protein	479	20	0	88.92
TraesCS3B02G526000	beta 1,3 glucanase	355	20	0	89.62
TraesCS3B02G529300	glucan endo-1,3-beta-D-glucosidase	335	20	0	96.44
TraesCS3B02G529700	glucan endo-1,3-beta-D-glucosidase	332	20	0	97.25
TraesCS3B02G531400	predicted protein	234	20	2.3e-144	87.13
TraesCS3B02G531700	amino-acid permease BAT1 homolog	522	20	0	91.97
TraesCS3B02G548600	two-component response regulator ORR4	240	20	1.55e-176	77.59
TraesCS3B02G549000	alpha-dioxygenase 1	617	20	0	96.19
TraesCS3B02G549800	protein IRON-RELATED TRANSCRIPTION FACTOR 2	237	20	2.37e-171	80.62
TraesCS3B02G561700	phospholipase A1-Igamma1, chloroplastic	540	20	0	80.68
TraesCS3B02G561800	unknown	508	5	1.46e-51	52.21
TraesCS3B02G563200	protein DETOXIFICATION 40-like	499	20	0	92.23
TraesCS3B02G565900	receptor-like protein 12	1028	20	0	75.92
TraesCS3B02G567500	Receptor-like protein kinase FERONIA	839	20	0	71.64
TraesCS3B02G568300	predicted protein	274	20	0	77.15
TraesCS3B02G574600	3-oxo-Delta(4,5)-steroid 5-beta-reductase	393	20	0	90.61
TraesCS3B02G584700	Barwin, putative, expressed	146	20	9.7e-103	95.1
TraesCS3B02G593500	putative disease resistance RPP13-like protein 3	1362	20	0	61.27
TraesCS3B02G594300	PHYTOCLOCK 1	287	20	0	93.65
TraesCS3B02G598200	anthocyanidin 5,3-O-glucosyltransferase-like	481	20	0	85.71
TraesCS3B02G608500	probable aquaporin TIP1-2	252	20	2.79e-176	95.8
TraesCS3D02G020600	GDSL esterase/lipase At3g26430	397	20	0	85.54
TraesCS3D02G020700	GDSL esterase/lipase At3g26430	384	20	0	85.36
TraesCS3D02G021200	sarcoplasmic reticulum histidine-rich calcium-binding protein	236	20	2.8e-152	77.61
TraesCS3D02G022000	predicted protein	252	20	6.67e-180	87.72
TraesCS3D02G022100	predicted protein	270	20	0	88.09
TraesCS3D02G028500	probable LRR receptor-like serine/threonine-protein kinase At4g36180	944	20	0	70.53
TraesCS3D02G028900	XAX1_ORYSJ RecName: Full=Beta-1,2-xylosyltransferease XAX1; AltName: Full=Protein XYLOSYL ARABINOSYL SUBSTITUTION OF XYLAN 1	564	20	0	83.16
TraesCS3D02G033800	Bowman-Birk type trypsin inhibitor-like	178	20	1.24e-124	74.13
TraesCS3D02G034200	Bowman-Birk type trypsin inhibitor	177	20	4.41e-120	75.66
TraesCS3D02G036000	putative receptor-like protein kinase At4g00960	399	20	0	85.12
TraesCS3D02G036100	mannose-6-phosphate isomerase 1 isoform X2	463	20	0	88.74
TraesCS3D02G039000	ethylene-responsive transcription factor ERF118-like	346	20	0	78.94
TraesCS3D02G039300	basic 7S globulin	349	20	0	74.95
TraesCS3D02G039400	basic 7S globulin	357	20	0	75.33
TraesCS3D02G040100	Receptor-like protein 12	296	20	1.39e-114	70.53
TraesCS3D02G041500	probable calcium-binding protein CML16	185	20	2.52e-131	83.48
TraesCS3D02G043500	Plastidic glucose transporter 4	501	20	0	96.31
TraesCS3D02G047700	flavonoid O-methyltransferase-like protein Os11g0303600	364	20	0	87.17
TraesCS3D02G061500	predicted protein	515	20	0	86.27
TraesCS3D02G061900	predicted protein	514	20	0	88
TraesCS3D02G066300	predicted protein	92	17	1.26e-48	70.72
TraesCS3D02G074400	metallothionein-like protein type 2	76	20	2.83e-47	81.64
TraesCS3D02G076300	probable folate-biopterin transporter 8, chloroplastic	502	20	0	91.84
TraesCS3D02G077000	BTB/POZ and MATH domain-containing protein 1-like	620	20	0	61.8
TraesCS3D02G077400	Premnaspirodiene oxygenase	507	20	0	91.27
TraesCS3D02G080100	predicted protein	128	20	1.42e-88	75.55
TraesCS3D02G081300	light-induced protein 1-like	133	20	1.09e-89	74.86
TraesCS3D02G084400	Peptidase family M48 family protein	327	20	0	90.05
TraesCS3D02G091900	universal stress protein PHOS32	160	20	1.49e-116	91.57
TraesCS3D02G092900	galactinol--sucrose galactosyltransferase	535	20	0	91.1
TraesCS3D02G097000	cysteine-rich receptor-like protein kinase 2	648	20	0	84.45
TraesCS3D02G102300	7-deoxyloganetin glucosyltransferase-like	496	20	0	89.35
TraesCS3D02G103900	chlorophyllase-2, chloroplastic	311	20	0	80.97
TraesCS3D02G104000	L-type lectin-domain containing receptor kinase IV.1	674	20	0	87.46
TraesCS3D02G107500	BTB/POZ domain and ankyrin repeat-containing protein NPR1	580	20	0	87.19
TraesCS3D02G109100	transcription factor MYB1R1-like	301	20	0	74.3
TraesCS3D02G109300	zinc finger CCCH domain-containing protein 2	383	20	0	86.09
TraesCS3D02G110200	auxin-responsive protein IAA2-like	230	20	3.02e-160	70.95
TraesCS3D02G112000	protodermal factor 1	232	20	1.65e-167	80.89
TraesCS3D02G116400	probable galactinol--sucrose galactosyltransferase 2	751	20	0	89.92
TraesCS3D02G116600	alkane hydroxylase MAH1-like	517	20	0	88.56
TraesCS3D02G118200	protein GIGANTEA	1153	20	0	96
TraesCS3D02G120000	probable serine incorporator	493	20	0	91.41
TraesCS3D02G126300	UDP-glucosyl transferase	496	20	0	93.61
TraesCS3D02G126500	UDP-glucosyl transferase	510	20	0	92.38
TraesCS3D02G127300	boron transporter	661	20	0	94.91
TraesCS3D02G129900	ABC transporter C family member 3	1020	20	0	95.79
TraesCS3D02G131000	DUF4050 family protein	189	20	2.53e-140	79.94
TraesCS3D02G134400	receptor-like protein kinase HERK 1	902	20	0	74.53
TraesCS3D02G149000	heme-binding protein 2	221	20	6.61e-163	88.49
TraesCS3D02G149300	cationic amino acid transporter 5	615	20	0	89.42
TraesCS3D02G149600	gibberellin 2-beta-dioxygenase 1-like	341	20	0	83.61
TraesCS3D02G150500	phosphoenolpyruvate carboxylase	1003	20	0	92.43
TraesCS3D02G151500	CBL-interacting protein kinase 5	464	20	0	93.02
TraesCS3D02G155300	predicted protein	84	18	3.05e-52	68.87
TraesCS3D02G155800	predicted protein	280	20	0	83.02
TraesCS3D02G158600	late embryogenesis abundant protein Lea14-A	151	20	2.5e-107	90.23
TraesCS3D02G159200	predicted protein	832	20	0	92.11
TraesCS3D02G160200	cytochrome P450 71A1	529	20	0	81.55
TraesCS3D02G160400	cytochrome P450 71A1	516	20	0	82.2
TraesCS3D02G167600	isoflavone reductase homolog IRL-like	314	20	0	74.67
TraesCS3D02G179200	alpha/beta-Hydrolases superfamily protein	725	20	0	82.16
TraesCS3D02G180800	late embryogenesis abundant	95	20	3.01e-56	76.54
TraesCS3D02G180900	protein SENESCENCE-ASSOCIATED GENE 21, mitochondrial	94	20	3.98e-56	76.79
TraesCS3D02G183100	kinesin-like protein KIN-14B	831	20	0	85.85
TraesCS3D02G188000	tonoplast dicarboxylate transporter-like	540	20	0	89.93
TraesCS3D02G188100	probable peptide/nitrate transporter At3g43790	477	20	0	85.77
TraesCS3D02G188900	alpha-glucosidase YihQ-like	892	20	0	83.28
TraesCS3D02G189400	hydroxymethylglutaryl-CoA lyase, mitochondrial	429	20	0	87.32
TraesCS3D02G200800	neutral/alkaline invertase 1, mitochondrial	614	20	0	92.52
TraesCS3D02G208500	transcription factor bHLH87	474	20	0	72.59
TraesCS3D02G210800	protein CONSERVED IN THE GREEN LINEAGE AND DIATOMS 27, chloroplastic	316	20	0	88.95
TraesCS3D02G212000	protein ALP1-like	532	20	0	84.18
TraesCS3D02G212100	probable protein phosphatase 2C 6	476	20	0	90.61
TraesCS3D02G219400	predicted protein	300	20	0	62.24
TraesCS3D02G222200	probable isoprenylcysteine alpha-carbonyl methylesterase ICMEL2 isoform X1	351	20	0	94.4
TraesCS3D02G223300	beta-carbonic anhydrase 1b	255	20	0	89.16
TraesCS3D02G224600	dihydroflavonol-4-reductase	354	20	0	98.55
TraesCS3D02G224700	SNF1-related protein kinase regulatory subunit gamma-1	405	20	0	83.29
TraesCS3D02G225000	aspartic proteinase oryzasin-1-like	547	20	0	83.07
TraesCS3D02G225500	urophorphyrin methylase 1	386	20	0	89.74
TraesCS3D02G226000	cytochrome P450 72A14	532	20	0	92.15
TraesCS3D02G228400	S-type anion channel SLAH2 isoform X2	628	20	0	84.93
TraesCS3D02G234300	ABC transporter G family member 37	964	20	0	95.73
TraesCS3D02G234400	ABC transporter G family member 36	1454	20	0	93.61
TraesCS3D02G237800	probable plastid-lipid-associated protein 14, chloroplastic	649	20	0	88.98
TraesCS3D02G238000	probable protein phosphatase 2C 8	400	20	0	81.99
TraesCS3D02G238400	Myosin heavy chain-like	1318	20	0	77.97
TraesCS3D02G241300	mannan endo-1,4-beta-mannosidase 1	425	20	0	86.92
TraesCS3D02G243200	uncharacterized protein LOC109771557	185	19	1.66e-131	85.5
TraesCS3D02G244900	fasciclin-like arabinogalactan protein 11	245	20	3.28e-175	84.22
TraesCS3D02G246800	probable choline kinase 2 isoform X2	362	20	0	90.6
TraesCS3D02G247000	putative methyltransferase DDB_G0268948	261	20	0	92.19
TraesCS3D02G248000	alpha-amylase 3, chloroplastic	833	20	0	83.46
TraesCS3D02G248700	Myosin family protein with Dil domain	1933	20	0	90.45
TraesCS3D02G249000	probable protein phosphatase 2C 50	379	20	0	86.8
TraesCS3D02G250600	glycine dehydrogenase (decarboxylating), mitochondrial	1031	20	0	96
TraesCS3D02G254100	late embryogenesis abundant protein, group 3-like	225	20	1.62e-150	75.81
TraesCS3D02G255200	farnesyl pyrophosphate synthase	354	20	0	93.54
TraesCS3D02G256500	mitogen-activated protein kinase kinase kinase 18	429	20	0	78.52
TraesCS3D02G258900	phosphoethanolamine N-methyltransferase 1-like	501	20	0	95.32
TraesCS3D02G260300	endochitinase	320	20	0	96.7
TraesCS3D02G260500	endochitinase	317	20	0	95.97
TraesCS3D02G262200	LEAF RUST 10 DISEASE-RESISTANCE LOCUS RECEPTOR-LIKE PROTEIN KINASE-like 1.2 isoform X2	704	20	0	78.47
TraesCS3D02G266700	protein SDE2 homolog	475	20	0	81.09
TraesCS3D02G267600	cyclase/dehydrase, putative, expressed	230	20	2.1e-168	82.84
TraesCS3D02G268900	predicted protein	918	20	0	69.77
TraesCS3D02G276600	auxin-responsive protein IAA6 isoform X1	335	20	0	82.36
TraesCS3D02G280500	probable peroxygenase 4	231	20	3.07e-160	78.03
TraesCS3D02G280600	Heat stress transcription factor C-1b	241	20	6.51e-178	82.87
TraesCS3D02G282100	chaperone protein dnaJ C76, chloroplastic	340	20	0	91.67
TraesCS3D02G287800	serine carboxypeptidase-like 2	470	20	0	84.98
TraesCS3D02G289500	probable WRKY transcription factor 65	281	20	0	81.87
TraesCS3D02G298200	triacylglycerol lipase SDP1	984	20	0	89.02
TraesCS3D02G299700	Glutathione S-transferase 1	218	20	8.56e-165	88.57
TraesCS3D02G299800	probable LRR receptor-like serine/threonine-protein kinase At5g10290	583	20	0	93.3
TraesCS3D02G301400	protein DETOXIFICATION 33	474	20	0	90.35
TraesCS3D02G303700	predicted protein	809	20	0	90.64
TraesCS3D02G305300	peroxidase 2-like	354	20	0	84.45
TraesCS3D02G310200	cytokinin dehydrogenase 5	531	20	0	90.57
TraesCS3D02G311100	predicted protein	194	20	8.6e-90	72.76
TraesCS3D02G314500	sphingosine kinase 2-like	491	20	0	80.7
TraesCS3D02G315700	diacylglycerol kinase 5	317	20	0	89.07
TraesCS3D02G320500	probable nucleoredoxin 2	394	20	0	88.81
TraesCS3D02G321500	predicted protein	246	20	3.51e-174	90.59
TraesCS3D02G323100	probable inactive purple acid phosphatase 27	628	20	0	89.15
TraesCS3D02G323400	probable F-box protein At5g04010	261	20	0	74.44
TraesCS3D02G324300	probable E3 ubiquitin-protein ligase RHC1A	342	20	0	78.48
TraesCS3D02G325300	Cytochrome P450 98A1	509	20	0	89.92
TraesCS3D02G328300	calmodulin	182	20	1.15e-129	93.94
TraesCS3D02G331400	non-specific lipid transfer protein GPI-anchored 2-like	190	20	5.62e-130	78.3
TraesCS3D02G332200	glycerophosphodiester phosphodiesterase GDPD1, chloroplastic	384	20	0	89.3
TraesCS3D02G336900	trans-cinnamate 4-monooxygenase	470	20	0	89.09
TraesCS3D02G338400	expansin Os-EXPA2	251	20	0	93.73
TraesCS3D02G339300	predicted protein	172	15	6.91e-126	88.17
TraesCS3D02G340400	amino acid transporter AVT6C isoform X2	450	20	0	89
TraesCS3D02G346300	ATP-dependent Clp protease adapter protein CLPS1, chloroplastic	168	20	1.76e-119	70
TraesCS3D02G349400	plant-specific domain TIGR01589 family protein expressed	95	20	6.21e-67	85.19
TraesCS3D02G353100	predicted protein	256	20	0	78.69
TraesCS3D02G353300	protein ESMERALDA 1 isoform X1	566	20	0	91.33
TraesCS3D02G354300	photosystem II reaction center PSB28 protein, chloroplastic	182	20	4.09e-132	86.46
TraesCS3D02G354400	predicted protein	571	20	0	93.54
TraesCS3D02G354700	WRKY transcription factor WRKY62	321	20	0	79.18
TraesCS3D02G355300	aspartic proteinase PCS1	433	20	0	92.02
TraesCS3D02G355900	probable protein phosphatase 2C 9	397	20	0	82.95
TraesCS3D02G356500	ultraviolet-B receptor UVR8	328	20	0	89.88
TraesCS3D02G356900	Aldo-keto reductase family 4 member C10	311	20	0	94.6
TraesCS3D02G357200	delta-1-pyrroline-5-carboxylate synthase 2	687	20	0	94.27
TraesCS3D02G358700	heme-binding-like protein At3g10130, chloroplastic	224	20	4.92e-163	83.15
TraesCS3D02G360900	uncharacterized acetyltransferase At3g50280-like	493	20	0	89.95
TraesCS3D02G361800	nematode resistance protein-like HSPRO1	467	20	0	91.29
TraesCS3D02G362000	cell division control protein 6 homolog	499	20	0	87.63
TraesCS3D02G367600	predicted protein	193	20	2.08e-140	81.11
TraesCS3D02G368000	transcription factor DIVARICATA	175	20	1.09e-126	82.66
TraesCS3D02G369200	urate oxidase	307	20	0	93.87
TraesCS3D02G369800	protein EARLY RESPONSIVE TO DEHYDRATION 15-like	150	20	1.15e-104	66.24
TraesCS3D02G374200	photosystem II 22 kDa protein, chloroplastic	273	20	0	88.62
TraesCS3D02G376600	amidophosphoribosyltransferase, chloroplastic-like	548	20	0	90.25
TraesCS3D02G379700	F-box protein interaction domain containing protein	433	20	0	84.12
TraesCS3D02G384200	E3 ubiquitin-protein ligase AIRP2	251	20	0	90.85
TraesCS3D02G388400	U-box domain-containing protein 45	804	20	0	91.89
TraesCS3D02G389700	---NA---	348
TraesCS3D02G390100	protein SENESCENCE-ASSOCIATED GENE 21, mitochondrial	90	20	1.09e-56	71.9
TraesCS3D02G390600	predicted protein	158	20	3.51e-113	80.52
TraesCS3D02G392600	predicted protein	599	20	0	86.13
TraesCS3D02G394800	BTB/POZ and TAZ domain-containing protein 3	250	20	0	80.95
TraesCS3D02G400800	predicted protein	853	20	0	70.08
TraesCS3D02G401200	NAC domain-containing protein 48	299	20	0	90.58
TraesCS3D02G402900	F-box protein SKP2A	379	20	0	91.1
TraesCS3D02G403200	5' exonuclease Apollo-like	636	20	0	83.28
TraesCS3D02G408800	proline transporter 1	447	20	0	85.73
TraesCS3D02G412300	predicted protein	89	20	8.43e-59	78.45
TraesCS3D02G412600	ABC transporter B family member 26, chloroplastic	675	20	0	92.26
TraesCS3D02G413900	thioredoxin F, chloroplastic	189	20	7.63e-137	81.6
TraesCS3D02G420400	E3 ubiquitin-protein ligase RNF4	264	20	0	75.22
TraesCS3D02G424200	UPF0481 protein At3g47200-like	445	20	0	87.74
TraesCS3D02G425800	squamosa promoter-binding-like protein 2	419	20	0	69.14
TraesCS3D02G427500	uncharacterized protein LOC109759631	140	20	2.37e-94	75.51
TraesCS3D02G428000	MADS-box transcription factor 51-like	159	20	6.47e-114	91.21
TraesCS3D02G428700	transcription factor TCP20	336	20	0	78.72
TraesCS3D02G431500	GDSL esterase/lipase APG-like	361	20	0	88.73
TraesCS3D02G440200	beta-glucosidase 5-like	366	20	0	89.43
TraesCS3D02G444700	flowering-promoting factor 1-like protein 2	117	20	3.85e-82	83.95
TraesCS3D02G444900	laccase-19	589	20	0	92.35
TraesCS3D02G449200	probable esterase PIR7A	265	20	0	86.76
TraesCS3D02G450500	protein SRG1	369	20	0	87.77
TraesCS3D02G457400	Protein kinase superfamily protein	354	20	0	90.97
TraesCS3D02G467600	xylanase inhibitor	408	20	0	94.3
TraesCS3D02G468500	transcription initiation factor TFIID subunit 9	224	20	7.28e-126	87.39
TraesCS3D02G474500	---NA---	64
TraesCS3D02G475000	predicted protein	338	20	0	84.85
TraesCS3D02G475200	beta 1,3 glucanase	334	20	0	88.97
TraesCS3D02G475800	cytokinin dehydrogenase 4	525	20	0	92.32
TraesCS3D02G477700	lichenase-2-like	333	20	0	88.01
TraesCS3D02G478000	glucan endo-1,3-beta-D-glucosidase	334	20	0	97.7
TraesCS3D02G478300	glucan endo-1,3-beta-D-glucosidase	336	20	4.41e-172	94.56
TraesCS3D02G480100	amino-acid permease BAT1 homolog	522	20	0	92.14
TraesCS3D02G481400	predicted protein	310	20	0	94.46
TraesCS3D02G483000	putative glutathione S-transferase	233	20	5.35e-174	81.66
TraesCS3D02G493700	Uridine 5'-monophosphate synthase	479	20	0	87.45
TraesCS3D02G494600	two-component response regulator ORR4	229	20	2.12e-168	78.48
TraesCS3D02G495400	protein IRON-RELATED TRANSCRIPTION FACTOR 2	238	20	0	81.04
TraesCS3D02G495700	protein IRON-RELATED TRANSCRIPTION FACTOR 2	247	20	0	80.87
TraesCS3D02G495800	predicted protein	406	20	0	70.19
TraesCS3D02G513700	CBS domain-containing protein CBSCBSPB3-like	525	20	0	77.33
TraesCS3D02G514000	predicted protein	322	20	0	70.03
TraesCS3D02G514300	3-oxo-Delta(4,5)-steroid 5-beta-reductase	393	20	0	90.89
TraesCS3D02G514500	DIMBOA UDP-glucosyltransferase BX9-like	465	20	0	83.34
TraesCS3D02G515400	putative disease resistance protein RGA3	911	20	0	70.63
TraesCS3D02G517100	Abscisic stress-ripening protein 1	175	20	7.03e-117	71.27
TraesCS3D02G519600	serine decarboxylase 1	488	20	0	87.19
TraesCS3D02G524700	Barwin, putative, expressed	148	20	8.38e-107	95.28
TraesCS3D02G527200	Wall-associated receptor kinase 5	718	20	0	70.78
TraesCS3D02G531900	PHYTOCLOCK 1	281	20	0	92.7
TraesCS3D02G534100	vacuolar-processing enzyme	475	20	0	93.28
TraesCS3D02G540800	Os03g0146200	328	2	6.25e-23	62.22
TraesCS3D02G540900	probable aquaporin TIP1-2	252	20	1.04e-176	95.8
TraesCS3D02G545200	uncharacterized acetyltransferase At3g50280	470	20	0	77.34
TraesCS4A02G002600	MADS-box transcription factor 47-like isoform X2	163	20	6.76e-116	92.93
TraesCS4A02G004800	15-cis-phytoene desaturase chloroplastic/chromoplastic	193	20	1.84e-139	75.96
TraesCS4A02G007900	Protein TIFY 11c	198	20	3.51e-132	65.02
TraesCS4A02G011700	predicted protein	236	20	1.04e-161	85.92
TraesCS4A02G013300	hypothetical protein TRIUR3_08408	66	20	2.27e-39	91.61
TraesCS4A02G017400	patatin-like protein 2	433	20	0	90.54
TraesCS4A02G017700	cyclic dof factor 1-like	437	20	0	80.53
TraesCS4A02G020000	embryonic protein DC-8-like	477	20	2.64e-100	67.92
TraesCS4A02G021700	protein SULFUR DEFICIENCY-INDUCED 1	316	20	0	81.05
TraesCS4A02G025300	3-ketoacyl-CoA synthase 20-like	509	20	0	87.96
TraesCS4A02G027700	Heat stress transcription factor A-2d	341	20	0	85
TraesCS4A02G027800	1,2-dihydroxy-3-keto-5-methylthiopentene dioxygenase 2	198	20	7.05e-149	97.05
TraesCS4A02G031600	predicted protein	723	20	0	91.79
TraesCS4A02G033600	predicted protein	176	20	6.06e-123	82.82
TraesCS4A02G035400	ethylene-responsive transcription factor RAP2-13-like	235	20	1e-164	77.01
TraesCS4A02G036200	4-coumarate--CoA ligase-like 1	549	20	0	88.73
TraesCS4A02G036400	uncharacterized protein LOC109754525	232	20	4.94e-166	89.49
TraesCS4A02G038500	inositol-3-phosphate synthase	510	20	0	98.7
TraesCS4A02G046700	strigolactone esterase D14	274	20	0	96.67
TraesCS4A02G052600	predicted protein	135	20	5.42e-91	85.33
TraesCS4A02G053900	pentatricopeptide repeat-containing protein At3g29290	520	20	0	84.61
TraesCS4A02G061800	allene oxide synthase	480	20	0	93.17
TraesCS4A02G061900	allene oxide synthase	482	20	0	95.21
TraesCS4A02G066200	Sugar transport protein 13	515	20	0	97.33
TraesCS4A02G071100	Glycosyl hydrolase family 10 protein, expressed	561	20	0	92.26
TraesCS4A02G071700	predicted protein	242	20	5.94e-113	75.79
TraesCS4A02G078300	Erythronate-4-phosphate dehydrogenase family protein	302	20	0	74.77
TraesCS4A02G080400	predicted protein	131	15	1.18e-89	90.04
TraesCS4A02G083100	tyrosine-specific transport protein-like	528	20	0	80.44
TraesCS4A02G091300	serine/arginine-rich splicing factor SR45a	312	20	1.54e-115	75.8
TraesCS4A02G094300	probable protein phosphatase 2C 30	409	20	0	86.04
TraesCS4A02G094900	predicted protein	465	20	0	81.31
TraesCS4A02G095900	aspartic proteinase PCS1	447	20	0	81.85
TraesCS4A02G096500	catalytic/ hydrolase	281	20	0	93.88
TraesCS4A02G097900	heat shock cognate 70 kDa protein 2	655	20	0	97.67
TraesCS4A02G098600	Heat shock cognate 70 kDa protein	669	20	0	95.12
TraesCS4A02G099000	cysteine-rich repeat secretory protein 55	270	20	1.38e-180	85.63
TraesCS4A02G101700	plant-specific domain TIGR01589 family protein	143	20	2.04e-47	88.08
TraesCS4A02G103900	protein IN2-1 homolog B	217	20	8.05e-156	93.34
TraesCS4A02G105500	thioredoxin-like protein AAED1, chloroplastic	259	20	0	83.15
TraesCS4A02G106100	hypothetical protein BRADI_1g65841v3	61	13	2.56e-12	63.98
TraesCS4A02G107100	low temperature-induced protein lt101.2	54	20	3.4e-29	89.9
TraesCS4A02G109200	probable 2-oxoglutarate-dependent dioxygenase At5g05600	368	20	0	89.66
TraesCS4A02G109300	omega-3 fatty acid desaturase, chloroplastic	439	20	0	90.99
TraesCS4A02G114000	predicted protein	170	20	3.22e-123	91.02
TraesCS4A02G127700	endoplasmic reticulum-Golgi intermediate compartment protein 3	387	20	0	93.88
TraesCS4A02G129100	late embryogenesis abundant protein 1-like	351	20	0	75
TraesCS4A02G130300	Phospholipid-transporting ATPase 1	637	20	0	87.08
TraesCS4A02G130400	thioredoxin-like 1-2, chloroplastic	276	20	0	86.23
TraesCS4A02G131200	O-fucosyltransferase 18	492	20	0	88.88
[truncated: 2,019 more rows]
