# Supplementary material for: Identification and transcriptomic profiling of salinity stress response genes in colored wheat mutant
Source: PeerJ. 2024 Mar 6;12:e17043. doi: 10.7717/peerj.17043 (PMC10924784; doi:10.7717/peerj.17043)
Supplement: Supplemental Information 8 [file peerj-12-17043-s008.xlsx]

## Sheet: Supplemenatry Table 5
Supplementary Table 5. Gene set enrichment analysis (GSEA) for PL1 and PL6 using gene ontology (GO) mapping of differentially expressed genes.
Group	Gene_ontology	Gene_number	NES	FDR	Gene ID
PL1_24h	amine_metabolic_process_(GO:0009308)	41	2.20824	9.14e-05	TraesCS1A02G159600	TraesCS1A02G234800	TraesCS1B02G018200	TraesCS1B02G173200	TraesCS2A02G049900	TraesCS2A02G378300	TraesCS2B02G048700	TraesCS2D02G049200	TraesCS2D02G075000	TraesCS2D02G335300	TraesCS2D02G549300	TraesCS3A02G321100	TraesCS3B02G041900	TraesCS3B02G068500	TraesCS3D02G310200	TraesCS3D02G361800	TraesCS3D02G475800	TraesCS4A02G318100	TraesCS4B02G183900	TraesCS4D02G184900	TraesCS5A02G552000	TraesCS5A02G552400	TraesCS5D02G568400	TraesCS6A02G093000	TraesCS6A02G163100	TraesCS6A02G165100	TraesCS6A02G219500	TraesCS6B02G186100	TraesCS6B02G187400	TraesCS6B02G203100	TraesCS6B02G425200	TraesCS6D02G148000	TraesCS6D02G148200	TraesCS6D02G148600	TraesCS6D02G202500	TraesCS6D02G370800	TraesCS7A02G350100	TraesCS7B02G232700	TraesCS7D02G063900	TraesCS7D02G265900	TraesCSU02G125500
PL1_48h	amine_metabolic_process_(GO:0009308)	41	2.29939	0.000102	TraesCS1A02G159600	TraesCS1A02G234800	TraesCS1B02G018200	TraesCS1B02G173200	TraesCS2A02G049900	TraesCS2A02G378300	TraesCS2B02G048700	TraesCS2D02G049200	TraesCS2D02G075000	TraesCS2D02G335300	TraesCS2D02G549300	TraesCS3A02G321100	TraesCS3B02G041900	TraesCS3B02G068500	TraesCS3D02G310200	TraesCS3D02G361800	TraesCS3D02G475800	TraesCS4A02G318100	TraesCS4B02G183900	TraesCS4D02G184900	TraesCS5A02G552000	TraesCS5A02G552400	TraesCS5D02G568400	TraesCS6A02G093000	TraesCS6A02G163100	TraesCS6A02G165100	TraesCS6A02G219500	TraesCS6B02G186100	TraesCS6B02G187400	TraesCS6B02G203100	TraesCS6B02G425200	TraesCS6D02G148000	TraesCS6D02G148200	TraesCS6D02G148600	TraesCS6D02G202500	TraesCS6D02G370800	TraesCS7A02G350100	TraesCS7B02G232700	TraesCS7D02G063900	TraesCS7D02G265900	TraesCSU02G125500
PL6_24h	amine_metabolic_process_(GO:0009308)	41	1.5576	0.0379941	TraesCS1A02G159600	TraesCS1A02G234800	TraesCS1B02G018200	TraesCS1B02G173200	TraesCS2A02G049900	TraesCS2A02G378300	TraesCS2B02G048700	TraesCS2D02G049200	TraesCS2D02G075000	TraesCS2D02G335300	TraesCS2D02G549300	TraesCS3A02G321100	TraesCS3B02G041900	TraesCS3B02G068500	TraesCS3D02G310200	TraesCS3D02G361800	TraesCS3D02G475800	TraesCS4A02G318100	TraesCS4B02G183900	TraesCS4D02G184900	TraesCS5A02G552000	TraesCS5A02G552400	TraesCS5D02G568400	TraesCS6A02G093000	TraesCS6A02G163100	TraesCS6A02G165100	TraesCS6A02G219500	TraesCS6B02G186100	TraesCS6B02G187400	TraesCS6B02G203100	TraesCS6B02G425200	TraesCS6D02G148000	TraesCS6D02G148200	TraesCS6D02G148600	TraesCS6D02G202500	TraesCS6D02G370800	TraesCS7A02G350100	TraesCS7B02G232700	TraesCS7D02G063900	TraesCS7D02G265900	TraesCSU02G125500
PL1_3h	antioxidant_activity_(GO:0016209)	45	-1.79942	0.0192805	TraesCS1A02G108400	TraesCS1B02G059100	TraesCS1B02G095800	TraesCS1B02G096200	TraesCS1B02G096900	TraesCS1B02G115900	TraesCS1D02G080300	TraesCS2A02G107600	TraesCS2A02G571300	TraesCS2A02G573900	TraesCS2B02G124600	TraesCS2B02G124800	TraesCS2B02G125800	TraesCS2B02G126200	TraesCS2B02G604800	TraesCS2B02G615600	TraesCS2B02G615800	TraesCS2D02G107600	TraesCS2D02G108500	TraesCS2D02G154300	TraesCS2D02G583000	TraesCS2D02G583200	TraesCS2D02G598000	TraesCS3A02G136300	TraesCS3A02G185900	TraesCS3A02G297200	TraesCS3B02G549000	TraesCS3D02G305300	TraesCS5B02G405300	TraesCS5D02G364600	TraesCS6A02G138000	TraesCS6A02G246400	TraesCS6B02G063800	TraesCS6B02G063900	TraesCS6B02G166200	TraesCS6B02G278100	TraesCS6D02G054900	TraesCS6D02G127100	TraesCS7A02G319100	TraesCS7A02G339600	TraesCS7B02G251100	TraesCS7D02G347300	TraesCS7D02G369400	TraesCS7D02G370400	TraesCS7D02G417400
PL1_24h	antioxidant_activity_(GO:0016209)	45	-2.21233	5.97e-05	TraesCS1A02G108400	TraesCS1B02G059100	TraesCS1B02G095800	TraesCS1B02G096200	TraesCS1B02G096900	TraesCS1B02G115900	TraesCS1D02G080300	TraesCS2A02G107600	TraesCS2A02G571300	TraesCS2A02G573900	TraesCS2B02G124600	TraesCS2B02G124800	TraesCS2B02G125800	TraesCS2B02G126200	TraesCS2B02G604800	TraesCS2B02G615600	TraesCS2B02G615800	TraesCS2D02G107600	TraesCS2D02G108500	TraesCS2D02G154300	TraesCS2D02G583000	TraesCS2D02G583200	TraesCS2D02G598000	TraesCS3A02G136300	TraesCS3A02G185900	TraesCS3A02G297200	TraesCS3B02G549000	TraesCS3D02G305300	TraesCS5B02G405300	TraesCS5D02G364600	TraesCS6A02G138000	TraesCS6A02G246400	TraesCS6B02G063800	TraesCS6B02G063900	TraesCS6B02G166200	TraesCS6B02G278100	TraesCS6D02G054900	TraesCS6D02G127100	TraesCS7A02G319100	TraesCS7A02G339600	TraesCS7B02G251100	TraesCS7D02G347300	TraesCS7D02G369400	TraesCS7D02G370400	TraesCS7D02G417400
PL6_24h	antioxidant_activity_(GO:0016209)	45	-2.40815	1e-11	TraesCS1A02G108400	TraesCS1B02G059100	TraesCS1B02G095800	TraesCS1B02G096200	TraesCS1B02G096900	TraesCS1B02G115900	TraesCS1D02G080300	TraesCS2A02G107600	TraesCS2A02G571300	TraesCS2A02G573900	TraesCS2B02G124600	TraesCS2B02G124800	TraesCS2B02G125800	TraesCS2B02G126200	TraesCS2B02G604800	TraesCS2B02G615600	TraesCS2B02G615800	TraesCS2D02G107600	TraesCS2D02G108500	TraesCS2D02G154300	TraesCS2D02G583000	TraesCS2D02G583200	TraesCS2D02G598000	TraesCS3A02G136300	TraesCS3A02G185900	TraesCS3A02G297200	TraesCS3B02G549000	TraesCS3D02G305300	TraesCS5B02G405300	TraesCS5D02G364600	TraesCS6A02G138000	TraesCS6A02G246400	TraesCS6B02G063800	TraesCS6B02G063900	TraesCS6B02G166200	TraesCS6B02G278100	TraesCS6D02G054900	TraesCS6D02G127100	TraesCS7A02G319100	TraesCS7A02G339600	TraesCS7B02G251100	TraesCS7D02G347300	TraesCS7D02G369400	TraesCS7D02G370400	TraesCS7D02G417400
PL6_48h	antioxidant_activity_(GO:0016209)	45	1.75085	0.00868983	TraesCS1A02G108400	TraesCS1B02G059100	TraesCS1B02G095800	TraesCS1B02G096200	TraesCS1B02G096900	TraesCS1B02G115900	TraesCS1D02G080300	TraesCS2A02G107600	TraesCS2A02G571300	TraesCS2A02G573900	TraesCS2B02G124600	TraesCS2B02G124800	TraesCS2B02G125800	TraesCS2B02G126200	TraesCS2B02G604800	TraesCS2B02G615600	TraesCS2B02G615800	TraesCS2D02G107600	TraesCS2D02G108500	TraesCS2D02G154300	TraesCS2D02G583000	TraesCS2D02G583200	TraesCS2D02G598000	TraesCS3A02G136300	TraesCS3A02G185900	TraesCS3A02G297200	TraesCS3B02G549000	TraesCS3D02G305300	TraesCS5B02G405300	TraesCS5D02G364600	TraesCS6A02G138000	TraesCS6A02G246400	TraesCS6B02G063800	TraesCS6B02G063900	TraesCS6B02G166200	TraesCS6B02G278100	TraesCS6D02G054900	TraesCS6D02G127100	TraesCS7A02G319100	TraesCS7A02G339600	TraesCS7B02G251100	TraesCS7D02G347300	TraesCS7D02G369400	TraesCS7D02G370400	TraesCS7D02G417400
PL1_24h	chlorophyll_binding_(GO:0016168)	31	-2.8876	1e-11	TraesCS1A02G403300	TraesCS1A02G403800	TraesCS1B02G432700	TraesCS1D02G375000	TraesCS1D02G411300	TraesCS1D02G411600	TraesCS2A02G204800	TraesCS5A02G454200	TraesCS5A02G454300	TraesCS5B02G227900	TraesCS5B02G462800	TraesCS5B02G463000	TraesCS5B02G463100	TraesCS5D02G329200	TraesCS5D02G357600	TraesCS5D02G464700	TraesCS5D02G464800	TraesCS6A02G093700	TraesCS6A02G094300	TraesCS6A02G159800	TraesCS6A02G319700	TraesCS6B02G122800	TraesCS6B02G191500	TraesCS6D02G088800	TraesCS6D02G152700	TraesCS7A02G238400	TraesCS7B02G103300	TraesCS7B02G192500	TraesCS7D02G199400	TraesCS7D02G227300	TraesCSU02G167700
PL1_48h	chlorophyll_binding_(GO:0016168)	31	-2.80158	1e-11	TraesCS1A02G403300	TraesCS1A02G403800	TraesCS1B02G432700	TraesCS1D02G375000	TraesCS1D02G411300	TraesCS1D02G411600	TraesCS2A02G204800	TraesCS5A02G454200	TraesCS5A02G454300	TraesCS5B02G227900	TraesCS5B02G462800	TraesCS5B02G463000	TraesCS5B02G463100	TraesCS5D02G329200	TraesCS5D02G357600	TraesCS5D02G464700	TraesCS5D02G464800	TraesCS6A02G093700	TraesCS6A02G094300	TraesCS6A02G159800	TraesCS6A02G319700	TraesCS6B02G122800	TraesCS6B02G191500	TraesCS6D02G088800	TraesCS6D02G152700	TraesCS7A02G238400	TraesCS7B02G103300	TraesCS7B02G192500	TraesCS7D02G199400	TraesCS7D02G227300	TraesCSU02G167700
PL6_24h	chlorophyll_binding_(GO:0016168)	31	-3.63653	1e-11	TraesCS1A02G403300	TraesCS1A02G403800	TraesCS1B02G432700	TraesCS1D02G375000	TraesCS1D02G411300	TraesCS1D02G411600	TraesCS2A02G204800	TraesCS5A02G454200	TraesCS5A02G454300	TraesCS5B02G227900	TraesCS5B02G462800	TraesCS5B02G463000	TraesCS5B02G463100	TraesCS5D02G329200	TraesCS5D02G357600	TraesCS5D02G464700	TraesCS5D02G464800	TraesCS6A02G093700	TraesCS6A02G094300	TraesCS6A02G159800	TraesCS6A02G319700	TraesCS6B02G122800	TraesCS6B02G191500	TraesCS6D02G088800	TraesCS6D02G152700	TraesCS7A02G238400	TraesCS7B02G103300	TraesCS7B02G192500	TraesCS7D02G199400	TraesCS7D02G227300	TraesCSU02G167700
PL6_48h	chlorophyll_binding_(GO:0016168)	31	-3.44448	1e-11	TraesCS1A02G403300	TraesCS1A02G403800	TraesCS1B02G432700	TraesCS1D02G375000	TraesCS1D02G411300	TraesCS1D02G411600	TraesCS2A02G204800	TraesCS5A02G454200	TraesCS5A02G454300	TraesCS5B02G227900	TraesCS5B02G462800	TraesCS5B02G463000	TraesCS5B02G463100	TraesCS5D02G329200	TraesCS5D02G357600	TraesCS5D02G464700	TraesCS5D02G464800	TraesCS6A02G093700	TraesCS6A02G094300	TraesCS6A02G159800	TraesCS6A02G319700	TraesCS6B02G122800	TraesCS6B02G191500	TraesCS6D02G088800	TraesCS6D02G152700	TraesCS7A02G238400	TraesCS7B02G103300	TraesCS7B02G192500	TraesCS7D02G199400	TraesCS7D02G227300	TraesCSU02G167700
PL1_24h	chloroplast_stroma_(GO:0009570)	61	-2.15714	0.000141	TraesCS1A02G215500	TraesCS1A02G223300	TraesCS1A02G403300	TraesCS1B02G037100	TraesCS1B02G226500	TraesCS1B02G229000	TraesCS1B02G236600	TraesCS1B02G264900	TraesCS1B02G432700	TraesCS1D02G177800	TraesCS1D02G218000	TraesCS1D02G252900	TraesCS1D02G411300	TraesCS1D02G411600	TraesCS2A02G129600	TraesCS2A02G290300	TraesCS2A02G517900	TraesCS2A02G523500	TraesCS2A02G581600	TraesCS2B02G151800	TraesCS2B02G306800	TraesCS2B02G311300	TraesCS2B02G553400	TraesCS2D02G131900	TraesCS2D02G150500	TraesCS2D02G288200	TraesCS2D02G298100	TraesCS2D02G598500	TraesCS3A02G129300	TraesCS3A02G248000	TraesCS3A02G265900	TraesCS3A02G375100	TraesCS3B02G299300	TraesCS3B02G335000	TraesCS3B02G407300	TraesCS3D02G367600	TraesCS4A02G149300	TraesCS4A02G320200	TraesCS4B02G158500	TraesCS5A02G247200	TraesCS5A02G374000	TraesCS5A02G459200	TraesCS5B02G468800	TraesCS5D02G329200	TraesCS5D02G357600
PL1_48h	chloroplast_stroma_(GO:0009570)	61	-2.56328	1e-11	TraesCS1A02G215500	TraesCS1A02G223300	TraesCS1A02G403300	TraesCS1B02G037100	TraesCS1B02G226500	TraesCS1B02G229000	TraesCS1B02G236600	TraesCS1B02G264900	TraesCS1B02G432700	TraesCS1D02G177800	TraesCS1D02G218000	TraesCS1D02G252900	TraesCS1D02G411300	TraesCS1D02G411600	TraesCS2A02G129600	TraesCS2A02G290300	TraesCS2A02G517900	TraesCS2A02G523500	TraesCS2A02G581600	TraesCS2B02G151800	TraesCS2B02G306800	TraesCS2B02G311300	TraesCS2B02G553400	TraesCS2D02G131900	TraesCS2D02G150500	TraesCS2D02G288200	TraesCS2D02G298100	TraesCS2D02G598500	TraesCS3A02G129300	TraesCS3A02G248000	TraesCS3A02G265900	TraesCS3A02G375100	TraesCS3B02G299300	TraesCS3B02G335000	TraesCS3B02G407300	TraesCS3D02G367600	TraesCS4A02G149300	TraesCS4A02G320200	TraesCS4B02G158500	TraesCS5A02G247200	TraesCS5A02G374000	TraesCS5A02G459200	TraesCS5B02G468800	TraesCS5D02G329200	TraesCS5D02G357600
PL6_24h	chloroplast_stroma_(GO:0009570)	61	-2.26603	0.000375	TraesCS1A02G215500	TraesCS1A02G223300	TraesCS1A02G403300	TraesCS1B02G037100	TraesCS1B02G226500	TraesCS1B02G229000	TraesCS1B02G236600	TraesCS1B02G264900	TraesCS1B02G432700	TraesCS1D02G177800	TraesCS1D02G218000	TraesCS1D02G252900	TraesCS1D02G411300	TraesCS1D02G411600	TraesCS2A02G129600	TraesCS2A02G290300	TraesCS2A02G517900	TraesCS2A02G523500	TraesCS2A02G581600	TraesCS2B02G151800	TraesCS2B02G306800	TraesCS2B02G311300	TraesCS2B02G553400	TraesCS2D02G131900	TraesCS2D02G150500	TraesCS2D02G288200	TraesCS2D02G298100	TraesCS2D02G598500	TraesCS3A02G129300	TraesCS3A02G248000	TraesCS3A02G265900	TraesCS3A02G375100	TraesCS3B02G299300	TraesCS3B02G335000	TraesCS3B02G407300	TraesCS3D02G367600	TraesCS4A02G149300	TraesCS4A02G320200	TraesCS4B02G158500	TraesCS5A02G247200	TraesCS5A02G374000	TraesCS5A02G459200	TraesCS5B02G468800	TraesCS5D02G329200	TraesCS5D02G357600
PL6_48h	chloroplast_stroma_(GO:0009570)	61	-2.83198	1e-11	TraesCS1A02G215500	TraesCS1A02G223300	TraesCS1A02G403300	TraesCS1B02G037100	TraesCS1B02G226500	TraesCS1B02G229000	TraesCS1B02G236600	TraesCS1B02G264900	TraesCS1B02G432700	TraesCS1D02G177800	TraesCS1D02G218000	TraesCS1D02G252900	TraesCS1D02G411300	TraesCS1D02G411600	TraesCS2A02G129600	TraesCS2A02G290300	TraesCS2A02G517900	TraesCS2A02G523500	TraesCS2A02G581600	TraesCS2B02G151800	TraesCS2B02G306800	TraesCS2B02G311300	TraesCS2B02G553400	TraesCS2D02G131900	TraesCS2D02G150500	TraesCS2D02G288200	TraesCS2D02G298100	TraesCS2D02G598500	TraesCS3A02G129300	TraesCS3A02G248000	TraesCS3A02G265900	TraesCS3A02G375100	TraesCS3B02G299300	TraesCS3B02G335000	TraesCS3B02G407300	TraesCS3D02G367600	TraesCS4A02G149300	TraesCS4A02G320200	TraesCS4B02G158500	TraesCS5A02G247200	TraesCS5A02G374000	TraesCS5A02G459200	TraesCS5B02G468800	TraesCS5D02G329200	TraesCS5D02G357600
PL1_24h	chloroplast_thylakoid_(GO:0009534)	57	-2.82758	1e-11	TraesCS1A02G223300	TraesCS1A02G403300	TraesCS1A02G403800	TraesCS1B02G071800	TraesCS1B02G236600	TraesCS1B02G432700	TraesCS1D02G375000	TraesCS1D02G411300	TraesCS1D02G411600	TraesCS2A02G046200	TraesCS2A02G204800	TraesCS2B02G553600	TraesCS2D02G150500	TraesCS2D02G432600	TraesCS3A02G375100	TraesCS3A02G398500	TraesCS3A02G516500	TraesCS3B02G392800	TraesCS3B02G407300	TraesCS3D02G367600	TraesCS3D02G392600	TraesCS4A02G011700	TraesCS4A02G320200	TraesCS4D02G291500	TraesCS5A02G454200	TraesCS5A02G454300	TraesCS5B02G218600	TraesCS5B02G227900	TraesCS5B02G316400	TraesCS5B02G462800	TraesCS5B02G463000	TraesCS5B02G463100	TraesCS5D02G178200	TraesCS5D02G321900	TraesCS5D02G329200	TraesCS5D02G357600	TraesCS5D02G464700	TraesCS5D02G464800	TraesCS6A02G009200	TraesCS6A02G093700	TraesCS6A02G094300	TraesCS6A02G159800	TraesCS6A02G319700	TraesCS6B02G113200	TraesCS6B02G122800
PL1_48h	chloroplast_thylakoid_(GO:0009534)	57	-2.92112	1e-11	TraesCS1A02G223300	TraesCS1A02G403300	TraesCS1A02G403800	TraesCS1B02G071800	TraesCS1B02G236600	TraesCS1B02G432700	TraesCS1D02G375000	TraesCS1D02G411300	TraesCS1D02G411600	TraesCS2A02G046200	TraesCS2A02G204800	TraesCS2B02G553600	TraesCS2D02G150500	TraesCS2D02G432600	TraesCS3A02G375100	TraesCS3A02G398500	TraesCS3A02G516500	TraesCS3B02G392800	TraesCS3B02G407300	TraesCS3D02G367600	TraesCS3D02G392600	TraesCS4A02G011700	TraesCS4A02G320200	TraesCS4D02G291500	TraesCS5A02G454200	TraesCS5A02G454300	TraesCS5B02G218600	TraesCS5B02G227900	TraesCS5B02G316400	TraesCS5B02G462800	TraesCS5B02G463000	TraesCS5B02G463100	TraesCS5D02G178200	TraesCS5D02G321900	TraesCS5D02G329200	TraesCS5D02G357600	TraesCS5D02G464700	TraesCS5D02G464800	TraesCS6A02G009200	TraesCS6A02G093700	TraesCS6A02G094300	TraesCS6A02G159800	TraesCS6A02G319700	TraesCS6B02G113200	TraesCS6B02G122800
PL6_24h	chloroplast_thylakoid_(GO:0009534)	57	-3.28166	1e-11	TraesCS1A02G223300	TraesCS1A02G403300	TraesCS1A02G403800	TraesCS1B02G071800	TraesCS1B02G236600	TraesCS1B02G432700	TraesCS1D02G375000	TraesCS1D02G411300	TraesCS1D02G411600	TraesCS2A02G046200	TraesCS2A02G204800	TraesCS2B02G553600	TraesCS2D02G150500	TraesCS2D02G432600	TraesCS3A02G375100	TraesCS3A02G398500	TraesCS3A02G516500	TraesCS3B02G392800	TraesCS3B02G407300	TraesCS3D02G367600	TraesCS3D02G392600	TraesCS4A02G011700	TraesCS4A02G320200	TraesCS4D02G291500	TraesCS5A02G454200	TraesCS5A02G454300	TraesCS5B02G218600	TraesCS5B02G227900	TraesCS5B02G316400	TraesCS5B02G462800	TraesCS5B02G463000	TraesCS5B02G463100	TraesCS5D02G178200	TraesCS5D02G321900	TraesCS5D02G329200	TraesCS5D02G357600	TraesCS5D02G464700	TraesCS5D02G464800	TraesCS6A02G009200	TraesCS6A02G093700	TraesCS6A02G094300	TraesCS6A02G159800	TraesCS6A02G319700	TraesCS6B02G113200	TraesCS6B02G122800
PL6_48h	chloroplast_thylakoid_(GO:0009534)	57	-3.11942	1e-11	TraesCS1A02G223300	TraesCS1A02G403300	TraesCS1A02G403800	TraesCS1B02G071800	TraesCS1B02G236600	TraesCS1B02G432700	TraesCS1D02G375000	TraesCS1D02G411300	TraesCS1D02G411600	TraesCS2A02G046200	TraesCS2A02G204800	TraesCS2B02G553600	TraesCS2D02G150500	TraesCS2D02G432600	TraesCS3A02G375100	TraesCS3A02G398500	TraesCS3A02G516500	TraesCS3B02G392800	TraesCS3B02G407300	TraesCS3D02G367600	TraesCS3D02G392600	TraesCS4A02G011700	TraesCS4A02G320200	TraesCS4D02G291500	TraesCS5A02G454200	TraesCS5A02G454300	TraesCS5B02G218600	TraesCS5B02G227900	TraesCS5B02G316400	TraesCS5B02G462800	TraesCS5B02G463000	TraesCS5B02G463100	TraesCS5D02G178200	TraesCS5D02G321900	TraesCS5D02G329200	TraesCS5D02G357600	TraesCS5D02G464700	TraesCS5D02G464800	TraesCS6A02G009200	TraesCS6A02G093700	TraesCS6A02G094300	TraesCS6A02G159800	TraesCS6A02G319700	TraesCS6B02G113200	TraesCS6B02G122800
PL6_48h	defense_response_(GO:0006952)	71	1.87187	0.00155791	TraesCS1A02G009900	TraesCS1A02G025600	TraesCS1A02G184900	TraesCS1A02G223300	TraesCS1A02G261400	TraesCS1A02G355300	TraesCS1B02G018100	TraesCS1B02G023000	TraesCS1B02G037100	TraesCS1B02G050200	TraesCS1B02G236600	TraesCS1D02G012000	TraesCS1D02G261400	TraesCS2A02G037400	TraesCS2A02G297100	TraesCS2A02G515700	TraesCS2A02G581600	TraesCS2B02G048700	TraesCS2B02G313300	TraesCS2B02G581900	TraesCS2B02G582000	TraesCS2B02G582100	TraesCS2D02G033100	TraesCS2D02G150500	TraesCS2D02G259300	TraesCS2D02G295000	TraesCS2D02G552100	TraesCS2D02G598500	TraesCS3A02G105400	TraesCS3A02G229700	TraesCS3A02G260100	TraesCS3A02G260200	TraesCS3A02G328000	TraesCS3A02G406000	TraesCS3A02G517100	TraesCS3B02G259000	TraesCS3B02G293200	TraesCS3B02G337700	TraesCS3B02G357500	TraesCS3B02G390500	TraesCS3B02G439600	TraesCS3B02G497800	TraesCS3B02G584700	TraesCS3B02G593500	TraesCS3D02G260300
PL1_3h	DNA-binding_transcription_factor_activity_(GO:0003700)	117	1.73859	0.0154021	TraesCS1A02G070400	TraesCS1A02G218100	TraesCS1A02G276800	TraesCS1A02G409800	TraesCS1A02G411100	TraesCS1A02G426700	TraesCS1B02G088900	TraesCS1B02G439800	TraesCS1B02G441300	TraesCS1B02G461600	TraesCS1D02G072900	TraesCS1D02G417100	TraesCS1D02G418900	TraesCS1D02G436500	TraesCS2A02G099900	TraesCS2A02G389400	TraesCS2A02G427700	TraesCS2B02G232000	TraesCS2B02G289900	TraesCS2B02G407600	TraesCS2B02G419600	TraesCS2B02G448100	TraesCS2B02G517400	TraesCS2B02G543800	TraesCS2D02G146100	TraesCS2D02G369900	TraesCS2D02G387300	TraesCS2D02G414600	TraesCS2D02G425700	TraesCS2D02G515900	TraesCS2D02G543900	TraesCS3A02G041200	TraesCS3A02G167200	TraesCS3A02G280800	TraesCS3A02G328000	TraesCS3A02G436100	TraesCS3A02G489500	TraesCS3A02G489600	TraesCS3A02G489700	TraesCS3A02G526600	TraesCS3B02G003200	TraesCS3B02G314600	TraesCS3B02G357500	TraesCS3B02G470700	TraesCS3B02G549800
PL1_24h	DNA-binding_transcription_factor_activity_(GO:0003700)	117	2.41438	1e-11	TraesCS1A02G070400	TraesCS1A02G218100	TraesCS1A02G276800	TraesCS1A02G409800	TraesCS1A02G411100	TraesCS1A02G426700	TraesCS1B02G088900	TraesCS1B02G439800	TraesCS1B02G441300	TraesCS1B02G461600	TraesCS1D02G072900	TraesCS1D02G417100	TraesCS1D02G418900	TraesCS1D02G436500	TraesCS2A02G099900	TraesCS2A02G389400	TraesCS2A02G427700	TraesCS2B02G232000	TraesCS2B02G289900	TraesCS2B02G407600	TraesCS2B02G419600	TraesCS2B02G448100	TraesCS2B02G517400	TraesCS2B02G543800	TraesCS2D02G146100	TraesCS2D02G369900	TraesCS2D02G387300	TraesCS2D02G414600	TraesCS2D02G425700	TraesCS2D02G515900	TraesCS2D02G543900	TraesCS3A02G041200	TraesCS3A02G167200	TraesCS3A02G280800	TraesCS3A02G328000	TraesCS3A02G436100	TraesCS3A02G489500	TraesCS3A02G489600	TraesCS3A02G489700	TraesCS3A02G526600	TraesCS3B02G003200	TraesCS3B02G314600	TraesCS3B02G357500	TraesCS3B02G470700	TraesCS3B02G549800
PL6_24h	DNA-binding_transcription_factor_activity_(GO:0003700)	117	1.92342	0.00219244	TraesCS1A02G070400	TraesCS1A02G218100	TraesCS1A02G276800	TraesCS1A02G409800	TraesCS1A02G411100	TraesCS1A02G426700	TraesCS1B02G088900	TraesCS1B02G439800	TraesCS1B02G441300	TraesCS1B02G461600	TraesCS1D02G072900	TraesCS1D02G417100	TraesCS1D02G418900	TraesCS1D02G436500	TraesCS2A02G099900	TraesCS2A02G389400	TraesCS2A02G427700	TraesCS2B02G232000	TraesCS2B02G289900	TraesCS2B02G407600	TraesCS2B02G419600	TraesCS2B02G448100	TraesCS2B02G517400	TraesCS2B02G543800	TraesCS2D02G146100	TraesCS2D02G369900	TraesCS2D02G387300	TraesCS2D02G414600	TraesCS2D02G425700	TraesCS2D02G515900	TraesCS2D02G543900	TraesCS3A02G041200	TraesCS3A02G167200	TraesCS3A02G280800	TraesCS3A02G328000	TraesCS3A02G436100	TraesCS3A02G489500	TraesCS3A02G489600	TraesCS3A02G489700	TraesCS3A02G526600	TraesCS3B02G003200	TraesCS3B02G314600	TraesCS3B02G357500	TraesCS3B02G470700	TraesCS3B02G549800
PL1_48h	endopeptidase_inhibitor_activity_(GO:0004866)	37	2.15535	0.000836	TraesCS1A02G265300	TraesCS1A02G265600	TraesCS1A02G265700	TraesCS1A02G265800	TraesCS1A02G265900	TraesCS1B02G034100	TraesCS1B02G035100	TraesCS1B02G276200	TraesCS1B02G276500	TraesCS1B02G276700	TraesCS1B02G276800	TraesCS1B02G276900	TraesCS1D02G020600	TraesCS1D02G027900	TraesCS1D02G265600	TraesCS1D02G265800	TraesCS1D02G265900	TraesCS1D02G266000	TraesCS1D02G266100	TraesCS2A02G158600	TraesCS2A02G158700	TraesCS2A02G158800	TraesCS2D02G165600	TraesCS2D02G165800	TraesCS3A02G046000	TraesCS3A02G046100	TraesCS3A02G046200	TraesCS3A02G093900	TraesCS3B02G037000	TraesCS3B02G038700	TraesCS3D02G033800	TraesCS3D02G034200	TraesCS4D02G298300	TraesCS5A02G484800	TraesCS5B02G498100	TraesCS5D02G498300	TraesCS6A02G071000
PL6_24h	endopeptidase_inhibitor_activity_(GO:0004866)	37	1.5794	0.0331691	TraesCS1A02G265300	TraesCS1A02G265600	TraesCS1A02G265700	TraesCS1A02G265800	TraesCS1A02G265900	TraesCS1B02G034100	TraesCS1B02G035100	TraesCS1B02G276200	TraesCS1B02G276500	TraesCS1B02G276700	TraesCS1B02G276800	TraesCS1B02G276900	TraesCS1D02G020600	TraesCS1D02G027900	TraesCS1D02G265600	TraesCS1D02G265800	TraesCS1D02G265900	TraesCS1D02G266000	TraesCS1D02G266100	TraesCS2A02G158600	TraesCS2A02G158700	TraesCS2A02G158800	TraesCS2D02G165600	TraesCS2D02G165800	TraesCS3A02G046000	TraesCS3A02G046100	TraesCS3A02G046200	TraesCS3A02G093900	TraesCS3B02G037000	TraesCS3B02G038700	TraesCS3D02G033800	TraesCS3D02G034200	TraesCS4D02G298300	TraesCS5A02G484800	TraesCS5B02G498100	TraesCS5D02G498300	TraesCS6A02G071000
PL6_48h	endopeptidase_inhibitor_activity_(GO:0004866)	37	2.0943	1e-11	TraesCS1A02G265300	TraesCS1A02G265600	TraesCS1A02G265700	TraesCS1A02G265800	TraesCS1A02G265900	TraesCS1B02G034100	TraesCS1B02G035100	TraesCS1B02G276200	TraesCS1B02G276500	TraesCS1B02G276700	TraesCS1B02G276800	TraesCS1B02G276900	TraesCS1D02G020600	TraesCS1D02G027900	TraesCS1D02G265600	TraesCS1D02G265800	TraesCS1D02G265900	TraesCS1D02G266000	TraesCS1D02G266100	TraesCS2A02G158600	TraesCS2A02G158700	TraesCS2A02G158800	TraesCS2D02G165600	TraesCS2D02G165800	TraesCS3A02G046000	TraesCS3A02G046100	TraesCS3A02G046200	TraesCS3A02G093900	TraesCS3B02G037000	TraesCS3B02G038700	TraesCS3D02G033800	TraesCS3D02G034200	TraesCS4D02G298300	TraesCS5A02G484800	TraesCS5B02G498100	TraesCS5D02G498300	TraesCS6A02G071000
PL1_48h	endopeptidase_regulator_activity_(GO:0061135)	37	2.18305	0.000624	TraesCS1A02G265300	TraesCS1A02G265600	TraesCS1A02G265700	TraesCS1A02G265800	TraesCS1A02G265900	TraesCS1B02G034100	TraesCS1B02G035100	TraesCS1B02G276200	TraesCS1B02G276500	TraesCS1B02G276700	TraesCS1B02G276800	TraesCS1B02G276900	TraesCS1D02G020600	TraesCS1D02G027900	TraesCS1D02G265600	TraesCS1D02G265800	TraesCS1D02G265900	TraesCS1D02G266000	TraesCS1D02G266100	TraesCS2A02G158600	TraesCS2A02G158700	TraesCS2A02G158800	TraesCS2D02G165600	TraesCS2D02G165800	TraesCS3A02G046000	TraesCS3A02G046100	TraesCS3A02G046200	TraesCS3A02G093900	TraesCS3B02G037000	TraesCS3B02G038700	TraesCS3D02G033800	TraesCS3D02G034200	TraesCS4D02G298300	TraesCS5A02G484800	TraesCS5B02G498100	TraesCS5D02G498300	TraesCS6A02G071000
PL6_24h	endopeptidase_regulator_activity_(GO:0061135)	37	1.58311	0.0328007	TraesCS1A02G265300	TraesCS1A02G265600	TraesCS1A02G265700	TraesCS1A02G265800	TraesCS1A02G265900	TraesCS1B02G034100	TraesCS1B02G035100	TraesCS1B02G276200	TraesCS1B02G276500	TraesCS1B02G276700	TraesCS1B02G276800	TraesCS1B02G276900	TraesCS1D02G020600	TraesCS1D02G027900	TraesCS1D02G265600	TraesCS1D02G265800	TraesCS1D02G265900	TraesCS1D02G266000	TraesCS1D02G266100	TraesCS2A02G158600	TraesCS2A02G158700	TraesCS2A02G158800	TraesCS2D02G165600	TraesCS2D02G165800	TraesCS3A02G046000	TraesCS3A02G046100	TraesCS3A02G046200	TraesCS3A02G093900	TraesCS3B02G037000	TraesCS3B02G038700	TraesCS3D02G033800	TraesCS3D02G034200	TraesCS4D02G298300	TraesCS5A02G484800	TraesCS5B02G498100	TraesCS5D02G498300	TraesCS6A02G071000
PL6_48h	endopeptidase_regulator_activity_(GO:0061135)	37	2.07263	1e-11	TraesCS1A02G265300	TraesCS1A02G265600	TraesCS1A02G265700	TraesCS1A02G265800	TraesCS1A02G265900	TraesCS1B02G034100	TraesCS1B02G035100	TraesCS1B02G276200	TraesCS1B02G276500	TraesCS1B02G276700	TraesCS1B02G276800	TraesCS1B02G276900	TraesCS1D02G020600	TraesCS1D02G027900	TraesCS1D02G265600	TraesCS1D02G265800	TraesCS1D02G265900	TraesCS1D02G266000	TraesCS1D02G266100	TraesCS2A02G158600	TraesCS2A02G158700	TraesCS2A02G158800	TraesCS2D02G165600	TraesCS2D02G165800	TraesCS3A02G046000	TraesCS3A02G046100	TraesCS3A02G046200	TraesCS3A02G093900	TraesCS3B02G037000	TraesCS3B02G038700	TraesCS3D02G033800	TraesCS3D02G034200	TraesCS4D02G298300	TraesCS5A02G484800	TraesCS5B02G498100	TraesCS5D02G498300	TraesCS6A02G071000
PL1_48h	enzyme_inhibitor_activity_(GO:0004857)	41	2.10114	0.00183085	TraesCS1A02G265300	TraesCS1A02G265600	TraesCS1A02G265700	TraesCS1A02G265800	TraesCS1A02G265900	TraesCS1B02G034100	TraesCS1B02G035100	TraesCS1B02G276200	TraesCS1B02G276500	TraesCS1B02G276700	TraesCS1B02G276800	TraesCS1B02G276900	TraesCS1D02G020600	TraesCS1D02G027900	TraesCS1D02G265600	TraesCS1D02G265800	TraesCS1D02G265900	TraesCS1D02G266000	TraesCS1D02G266100	TraesCS2A02G158600	TraesCS2A02G158700	TraesCS2A02G158800	TraesCS2A02G467500	TraesCS2B02G226900	TraesCS2B02G490400	TraesCS2D02G165600	TraesCS2D02G165800	TraesCS2D02G467500	TraesCS3A02G046000	TraesCS3A02G046100	TraesCS3A02G046200	TraesCS3A02G093900	TraesCS3B02G037000	TraesCS3B02G038700	TraesCS3D02G033800	TraesCS3D02G034200	TraesCS4D02G298300	TraesCS5A02G484800	TraesCS5B02G498100	TraesCS5D02G498300	TraesCS6A02G071000
PL6_24h	enzyme_inhibitor_activity_(GO:0004857)	41	1.66765	0.0194476	TraesCS1A02G265300	TraesCS1A02G265600	TraesCS1A02G265700	TraesCS1A02G265800	TraesCS1A02G265900	TraesCS1B02G034100	TraesCS1B02G035100	TraesCS1B02G276200	TraesCS1B02G276500	TraesCS1B02G276700	TraesCS1B02G276800	TraesCS1B02G276900	TraesCS1D02G020600	TraesCS1D02G027900	TraesCS1D02G265600	TraesCS1D02G265800	TraesCS1D02G265900	TraesCS1D02G266000	TraesCS1D02G266100	TraesCS2A02G158600	TraesCS2A02G158700	TraesCS2A02G158800	TraesCS2A02G467500	TraesCS2B02G226900	TraesCS2B02G490400	TraesCS2D02G165600	TraesCS2D02G165800	TraesCS2D02G467500	TraesCS3A02G046000	TraesCS3A02G046100	TraesCS3A02G046200	TraesCS3A02G093900	TraesCS3B02G037000	TraesCS3B02G038700	TraesCS3D02G033800	TraesCS3D02G034200	TraesCS4D02G298300	TraesCS5A02G484800	TraesCS5B02G498100	TraesCS5D02G498300	TraesCS6A02G071000
PL6_48h	enzyme_inhibitor_activity_(GO:0004857)	41	2.04971	7.6e-05	TraesCS1A02G265300	TraesCS1A02G265600	TraesCS1A02G265700	TraesCS1A02G265800	TraesCS1A02G265900	TraesCS1B02G034100	TraesCS1B02G035100	TraesCS1B02G276200	TraesCS1B02G276500	TraesCS1B02G276700	TraesCS1B02G276800	TraesCS1B02G276900	TraesCS1D02G020600	TraesCS1D02G027900	TraesCS1D02G265600	TraesCS1D02G265800	TraesCS1D02G265900	TraesCS1D02G266000	TraesCS1D02G266100	TraesCS2A02G158600	TraesCS2A02G158700	TraesCS2A02G158800	TraesCS2A02G467500	TraesCS2B02G226900	TraesCS2B02G490400	TraesCS2D02G165600	TraesCS2D02G165800	TraesCS2D02G467500	TraesCS3A02G046000	TraesCS3A02G046100	TraesCS3A02G046200	TraesCS3A02G093900	TraesCS3B02G037000	TraesCS3B02G038700	TraesCS3D02G033800	TraesCS3D02G034200	TraesCS4D02G298300	TraesCS5A02G484800	TraesCS5B02G498100	TraesCS5D02G498300	TraesCS6A02G071000
PL6_48h	glutathione_metabolic_process_(GO:0006749)	38	1.74525	0.00912921	TraesCS1A02G186100	TraesCS1A02G186600	TraesCS1A02G186800	TraesCS1B02G059100	TraesCS1B02G097200	TraesCS1B02G097400	TraesCS1B02G113700	TraesCS1B02G194900	TraesCS1D02G190000	TraesCS1D02G191100	TraesCS2A02G045400	TraesCS2A02G342800	TraesCS2B02G244100	TraesCS2D02G044100	TraesCS3D02G299700	TraesCS3D02G483000	TraesCS4A02G103900	TraesCS4A02G454800	TraesCS4A02G455000	TraesCS4B02G059100	TraesCS4B02G059300	TraesCS4B02G200100	TraesCS4D02G201100	TraesCS5A02G502500	TraesCS5D02G030000	TraesCS5D02G440700	TraesCS6A02G059600	TraesCS6A02G068300	TraesCS6B02G080000	TraesCS6B02G092200	TraesCS6B02G337600	TraesCS6B02G429400	TraesCS6D02G065900	TraesCS7B02G252500	TraesCS7D02G030800	TraesCS7D02G051700	TraesCS7D02G078700	TraesCS7D02G348500
PL1_3h	hydrogen_peroxide_catabolic_process_(GO:0042744)	38	-1.88348	0.0128843	TraesCS1A02G108400	TraesCS1B02G095800	TraesCS1B02G096200	TraesCS1B02G096900	TraesCS1B02G115900	TraesCS1D02G080300	TraesCS2A02G107600	TraesCS2A02G571300	TraesCS2A02G573900	TraesCS2B02G124600	TraesCS2B02G124800	TraesCS2B02G125800	TraesCS2B02G126200	TraesCS2B02G615600	TraesCS2B02G615800	TraesCS2D02G107600	TraesCS2D02G108500	TraesCS2D02G583000	TraesCS2D02G583200	TraesCS3A02G136300	TraesCS3A02G185900	TraesCS3A02G297200	TraesCS3D02G305300	TraesCS5B02G405300	TraesCS5D02G364600	TraesCS6A02G138000	TraesCS6B02G063800	TraesCS6B02G063900	TraesCS6B02G166200	TraesCS6D02G054900	TraesCS6D02G127100	TraesCS7A02G319100	TraesCS7A02G339600	TraesCS7B02G251100	TraesCS7D02G347300	TraesCS7D02G369400	TraesCS7D02G370400	TraesCS7D02G417400
PL1_24h	hydrogen_peroxide_catabolic_process_(GO:0042744)	38	-2.35424	1e-11	TraesCS1A02G108400	TraesCS1B02G095800	TraesCS1B02G096200	TraesCS1B02G096900	TraesCS1B02G115900	TraesCS1D02G080300	TraesCS2A02G107600	TraesCS2A02G571300	TraesCS2A02G573900	TraesCS2B02G124600	TraesCS2B02G124800	TraesCS2B02G125800	TraesCS2B02G126200	TraesCS2B02G615600	TraesCS2B02G615800	TraesCS2D02G107600	TraesCS2D02G108500	TraesCS2D02G583000	TraesCS2D02G583200	TraesCS3A02G136300	TraesCS3A02G185900	TraesCS3A02G297200	TraesCS3D02G305300	TraesCS5B02G405300	TraesCS5D02G364600	TraesCS6A02G138000	TraesCS6B02G063800	TraesCS6B02G063900	TraesCS6B02G166200	TraesCS6D02G054900	TraesCS6D02G127100	TraesCS7A02G319100	TraesCS7A02G339600	TraesCS7B02G251100	TraesCS7D02G347300	TraesCS7D02G369400	TraesCS7D02G370400	TraesCS7D02G417400
PL6_24h	hydrogen_peroxide_catabolic_process_(GO:0042744)	38	-2.65493	1e-11	TraesCS1A02G108400	TraesCS1B02G095800	TraesCS1B02G096200	TraesCS1B02G096900	TraesCS1B02G115900	TraesCS1D02G080300	TraesCS2A02G107600	TraesCS2A02G571300	TraesCS2A02G573900	TraesCS2B02G124600	TraesCS2B02G124800	TraesCS2B02G125800	TraesCS2B02G126200	TraesCS2B02G615600	TraesCS2B02G615800	TraesCS2D02G107600	TraesCS2D02G108500	TraesCS2D02G583000	TraesCS2D02G583200	TraesCS3A02G136300	TraesCS3A02G185900	TraesCS3A02G297200	TraesCS3D02G305300	TraesCS5B02G405300	TraesCS5D02G364600	TraesCS6A02G138000	TraesCS6B02G063800	TraesCS6B02G063900	TraesCS6B02G166200	TraesCS6D02G054900	TraesCS6D02G127100	TraesCS7A02G319100	TraesCS7A02G339600	TraesCS7B02G251100	TraesCS7D02G347300	TraesCS7D02G369400	TraesCS7D02G370400	TraesCS7D02G417400
PL6_48h	hydrogen_peroxide_catabolic_process_(GO:0042744)	38	1.81151	0.00430082	TraesCS1A02G108400	TraesCS1B02G095800	TraesCS1B02G096200	TraesCS1B02G096900	TraesCS1B02G115900	TraesCS1D02G080300	TraesCS2A02G107600	TraesCS2A02G571300	TraesCS2A02G573900	TraesCS2B02G124600	TraesCS2B02G124800	TraesCS2B02G125800	TraesCS2B02G126200	TraesCS2B02G615600	TraesCS2B02G615800	TraesCS2D02G107600	TraesCS2D02G108500	TraesCS2D02G583000	TraesCS2D02G583200	TraesCS3A02G136300	TraesCS3A02G185900	TraesCS3A02G297200	TraesCS3D02G305300	TraesCS5B02G405300	TraesCS5D02G364600	TraesCS6A02G138000	TraesCS6B02G063800	TraesCS6B02G063900	TraesCS6B02G166200	TraesCS6D02G054900	TraesCS6D02G127100	TraesCS7A02G319100	TraesCS7A02G339600	TraesCS7B02G251100	TraesCS7D02G347300	TraesCS7D02G369400	TraesCS7D02G370400	TraesCS7D02G417400
PL1_24h	lyase_activity_(GO:0016829)	96	-1.97456	0.00147047	TraesCS1A02G329500	TraesCS1B02G018200	TraesCS1B02G057900	TraesCS1B02G150200	TraesCS1D02G184500	TraesCS1D02G188500	TraesCS2A02G027800	TraesCS2A02G066700	TraesCS2A02G067000	TraesCS2A02G067100	TraesCS2A02G067200	TraesCS2A02G067300	TraesCS2A02G136500	TraesCS2A02G170200	TraesCS2A02G380900	TraesCS2A02G381000	TraesCS2A02G381100	TraesCS2B02G013200	TraesCS2B02G079400	TraesCS2B02G079500	TraesCS2B02G083800	TraesCS2B02G160400	TraesCS2B02G196500	TraesCS2B02G224000	TraesCS2B02G311300	TraesCS2B02G398200	TraesCS2B02G398300	TraesCS2B02G398400	TraesCS2B02G445200	TraesCS2B02G445500	TraesCS2B02G445800	TraesCS2D02G007000	TraesCS2D02G065200	TraesCS2D02G065300	TraesCS2D02G065400	TraesCS2D02G065600	TraesCS2D02G139100	TraesCS2D02G177900	TraesCS2D02G377500	TraesCS2D02G377600	TraesCS2D02G394200	TraesCS2D02G423400	TraesCS2D02G423500	TraesCS3A02G134200	TraesCS3A02G227700
PL1_48h	lyase_activity_(GO:0016829)	96	-2.02857	0.000761	TraesCS1A02G329500	TraesCS1B02G018200	TraesCS1B02G057900	TraesCS1B02G150200	TraesCS1D02G184500	TraesCS1D02G188500	TraesCS2A02G027800	TraesCS2A02G066700	TraesCS2A02G067000	TraesCS2A02G067100	TraesCS2A02G067200	TraesCS2A02G067300	TraesCS2A02G136500	TraesCS2A02G170200	TraesCS2A02G380900	TraesCS2A02G381000	TraesCS2A02G381100	TraesCS2B02G013200	TraesCS2B02G079400	TraesCS2B02G079500	TraesCS2B02G083800	TraesCS2B02G160400	TraesCS2B02G196500	TraesCS2B02G224000	TraesCS2B02G311300	TraesCS2B02G398200	TraesCS2B02G398300	TraesCS2B02G398400	TraesCS2B02G445200	TraesCS2B02G445500	TraesCS2B02G445800	TraesCS2D02G007000	TraesCS2D02G065200	TraesCS2D02G065300	TraesCS2D02G065400	TraesCS2D02G065600	TraesCS2D02G139100	TraesCS2D02G177900	TraesCS2D02G377500	TraesCS2D02G377600	TraesCS2D02G394200	TraesCS2D02G423400	TraesCS2D02G423500	TraesCS3A02G134200	TraesCS3A02G227700
PL6_24h	macromolecule_catabolic_process_(GO:0009057)	54	1.6149	0.0286021	TraesCS1A02G203600	TraesCS1A02G203700	TraesCS1A02G215500	TraesCS1A02G250000	TraesCS1B02G229000	TraesCS1D02G207000	TraesCS1D02G207100	TraesCS1D02G218000	TraesCS2A02G350800	TraesCS2B02G240200	TraesCS2B02G369000	TraesCS2B02G535400	TraesCS2D02G033100	TraesCS2D02G163300	TraesCS2D02G368600	TraesCS3A02G260100	TraesCS3A02G260200	TraesCS3A02G298300	TraesCS3A02G471900	TraesCS3A02G528800	TraesCS3A02G528900	TraesCS3B02G233000	TraesCS3B02G293200	TraesCS3B02G384900	TraesCS3D02G039400	TraesCS3D02G260300	TraesCS3D02G260500	TraesCS3D02G303700	TraesCS3D02G346300	TraesCS3D02G467600	TraesCS3D02G534100	TraesCS4A02G173800	TraesCS4B02G344300	TraesCS4D02G325500	TraesCS4D02G339400	TraesCS5A02G513200	TraesCS5B02G403700	TraesCS5D02G408200	TraesCS6A02G000300	TraesCS6A02G184500	TraesCS6A02G216100	TraesCS6A02G243000	TraesCS6A02G319200	TraesCS6B02G211900	TraesCS6B02G246800
PL6_48h	macromolecule_catabolic_process_(GO:0009057)	54	1.66056	0.02148	TraesCS1A02G203600	TraesCS1A02G203700	TraesCS1A02G215500	TraesCS1A02G250000	TraesCS1B02G229000	TraesCS1D02G207000	TraesCS1D02G207100	TraesCS1D02G218000	TraesCS2A02G350800	TraesCS2B02G240200	TraesCS2B02G369000	TraesCS2B02G535400	TraesCS2D02G033100	TraesCS2D02G163300	TraesCS2D02G368600	TraesCS3A02G260100	TraesCS3A02G260200	TraesCS3A02G298300	TraesCS3A02G471900	TraesCS3A02G528800	TraesCS3A02G528900	TraesCS3B02G233000	TraesCS3B02G293200	TraesCS3B02G384900	TraesCS3D02G039400	TraesCS3D02G260300	TraesCS3D02G260500	TraesCS3D02G303700	TraesCS3D02G346300	TraesCS3D02G467600	TraesCS3D02G534100	TraesCS4A02G173800	TraesCS4B02G344300	TraesCS4D02G325500	TraesCS4D02G339400	TraesCS5A02G513200	TraesCS5B02G403700	TraesCS5D02G408200	TraesCS6A02G000300	TraesCS6A02G184500	TraesCS6A02G216100	TraesCS6A02G243000	TraesCS6A02G319200	TraesCS6B02G211900	TraesCS6B02G246800
PL1_48h	peptidase_inhibitor_activity_(GO:0030414)	37	2.19989	0.000498	TraesCS1A02G265300	TraesCS1A02G265600	TraesCS1A02G265700	TraesCS1A02G265800	TraesCS1A02G265900	TraesCS1B02G034100	TraesCS1B02G035100	TraesCS1B02G276200	TraesCS1B02G276500	TraesCS1B02G276700	TraesCS1B02G276800	TraesCS1B02G276900	TraesCS1D02G020600	TraesCS1D02G027900	TraesCS1D02G265600	TraesCS1D02G265800	TraesCS1D02G265900	TraesCS1D02G266000	TraesCS1D02G266100	TraesCS2A02G158600	TraesCS2A02G158700	TraesCS2A02G158800	TraesCS2D02G165600	TraesCS2D02G165800	TraesCS3A02G046000	TraesCS3A02G046100	TraesCS3A02G046200	TraesCS3A02G093900	TraesCS3B02G037000	TraesCS3B02G038700	TraesCS3D02G033800	TraesCS3D02G034200	TraesCS4D02G298300	TraesCS5A02G484800	TraesCS5B02G498100	TraesCS5D02G498300	TraesCS6A02G071000
PL6_24h	peptidase_inhibitor_activity_(GO:0030414)	37	1.54942	0.0402905	TraesCS1A02G265300	TraesCS1A02G265600	TraesCS1A02G265700	TraesCS1A02G265800	TraesCS1A02G265900	TraesCS1B02G034100	TraesCS1B02G035100	TraesCS1B02G276200	TraesCS1B02G276500	TraesCS1B02G276700	TraesCS1B02G276800	TraesCS1B02G276900	TraesCS1D02G020600	TraesCS1D02G027900	TraesCS1D02G265600	TraesCS1D02G265800	TraesCS1D02G265900	TraesCS1D02G266000	TraesCS1D02G266100	TraesCS2A02G158600	TraesCS2A02G158700	TraesCS2A02G158800	TraesCS2D02G165600	TraesCS2D02G165800	TraesCS3A02G046000	TraesCS3A02G046100	TraesCS3A02G046200	TraesCS3A02G093900	TraesCS3B02G037000	TraesCS3B02G038700	TraesCS3D02G033800	TraesCS3D02G034200	TraesCS4D02G298300	TraesCS5A02G484800	TraesCS5B02G498100	TraesCS5D02G498300	TraesCS6A02G071000
PL6_48h	peptidase_inhibitor_activity_(GO:0030414)	37	2.08414	1e-11	TraesCS1A02G265300	TraesCS1A02G265600	TraesCS1A02G265700	TraesCS1A02G265800	TraesCS1A02G265900	TraesCS1B02G034100	TraesCS1B02G035100	TraesCS1B02G276200	TraesCS1B02G276500	TraesCS1B02G276700	TraesCS1B02G276800	TraesCS1B02G276900	TraesCS1D02G020600	TraesCS1D02G027900	TraesCS1D02G265600	TraesCS1D02G265800	TraesCS1D02G265900	TraesCS1D02G266000	TraesCS1D02G266100	TraesCS2A02G158600	TraesCS2A02G158700	TraesCS2A02G158800	TraesCS2D02G165600	TraesCS2D02G165800	TraesCS3A02G046000	TraesCS3A02G046100	TraesCS3A02G046200	TraesCS3A02G093900	TraesCS3B02G037000	TraesCS3B02G038700	TraesCS3D02G033800	TraesCS3D02G034200	TraesCS4D02G298300	TraesCS5A02G484800	TraesCS5B02G498100	TraesCS5D02G498300	TraesCS6A02G071000
PL1_3h	peroxidase_activity_(GO:0004601)	44	-1.7887	0.0188491	TraesCS1A02G108400	TraesCS1B02G095800	TraesCS1B02G096200	TraesCS1B02G096900	TraesCS1B02G115900	TraesCS1D02G080300	TraesCS2A02G107600	TraesCS2A02G571300	TraesCS2A02G573900	TraesCS2B02G124600	TraesCS2B02G124800	TraesCS2B02G125800	TraesCS2B02G126200	TraesCS2B02G604800	TraesCS2B02G615600	TraesCS2B02G615800	TraesCS2D02G107600	TraesCS2D02G108500	TraesCS2D02G154300	TraesCS2D02G583000	TraesCS2D02G583200	TraesCS2D02G598000	TraesCS3A02G136300	TraesCS3A02G185900	TraesCS3A02G297200	TraesCS3B02G549000	TraesCS3D02G305300	TraesCS5B02G405300	TraesCS5D02G364600	TraesCS6A02G138000	TraesCS6A02G246400	TraesCS6B02G063800	TraesCS6B02G063900	TraesCS6B02G166200	TraesCS6B02G278100	TraesCS6D02G054900	TraesCS6D02G127100	TraesCS7A02G319100	TraesCS7A02G339600	TraesCS7B02G251100	TraesCS7D02G347300	TraesCS7D02G369400	TraesCS7D02G370400	TraesCS7D02G417400
PL1_24h	peroxidase_activity_(GO:0004601)	44	-2.20528	7.12e-05	TraesCS1A02G108400	TraesCS1B02G095800	TraesCS1B02G096200	TraesCS1B02G096900	TraesCS1B02G115900	TraesCS1D02G080300	TraesCS2A02G107600	TraesCS2A02G571300	TraesCS2A02G573900	TraesCS2B02G124600	TraesCS2B02G124800	TraesCS2B02G125800	TraesCS2B02G126200	TraesCS2B02G604800	TraesCS2B02G615600	TraesCS2B02G615800	TraesCS2D02G107600	TraesCS2D02G108500	TraesCS2D02G154300	TraesCS2D02G583000	TraesCS2D02G583200	TraesCS2D02G598000	TraesCS3A02G136300	TraesCS3A02G185900	TraesCS3A02G297200	TraesCS3B02G549000	TraesCS3D02G305300	TraesCS5B02G405300	TraesCS5D02G364600	TraesCS6A02G138000	TraesCS6A02G246400	TraesCS6B02G063800	TraesCS6B02G063900	TraesCS6B02G166200	TraesCS6B02G278100	TraesCS6D02G054900	TraesCS6D02G127100	TraesCS7A02G319100	TraesCS7A02G339600	TraesCS7B02G251100	TraesCS7D02G347300	TraesCS7D02G369400	TraesCS7D02G370400	TraesCS7D02G417400
PL6_24h	peroxidase_activity_(GO:0004601)	44	-2.37815	1e-11	TraesCS1A02G108400	TraesCS1B02G095800	TraesCS1B02G096200	TraesCS1B02G096900	TraesCS1B02G115900	TraesCS1D02G080300	TraesCS2A02G107600	TraesCS2A02G571300	TraesCS2A02G573900	TraesCS2B02G124600	TraesCS2B02G124800	TraesCS2B02G125800	TraesCS2B02G126200	TraesCS2B02G604800	TraesCS2B02G615600	TraesCS2B02G615800	TraesCS2D02G107600	TraesCS2D02G108500	TraesCS2D02G154300	TraesCS2D02G583000	TraesCS2D02G583200	TraesCS2D02G598000	TraesCS3A02G136300	TraesCS3A02G185900	TraesCS3A02G297200	TraesCS3B02G549000	TraesCS3D02G305300	TraesCS5B02G405300	TraesCS5D02G364600	TraesCS6A02G138000	TraesCS6A02G246400	TraesCS6B02G063800	TraesCS6B02G063900	TraesCS6B02G166200	TraesCS6B02G278100	TraesCS6D02G054900	TraesCS6D02G127100	TraesCS7A02G319100	TraesCS7A02G339600	TraesCS7B02G251100	TraesCS7D02G347300	TraesCS7D02G369400	TraesCS7D02G370400	TraesCS7D02G417400
PL6_48h	peroxidase_activity_(GO:0004601)	44	1.77525	0.00707228	TraesCS1A02G108400	TraesCS1B02G095800	TraesCS1B02G096200	TraesCS1B02G096900	TraesCS1B02G115900	TraesCS1D02G080300	TraesCS2A02G107600	TraesCS2A02G571300	TraesCS2A02G573900	TraesCS2B02G124600	TraesCS2B02G124800	TraesCS2B02G125800	TraesCS2B02G126200	TraesCS2B02G604800	TraesCS2B02G615600	TraesCS2B02G615800	TraesCS2D02G107600	TraesCS2D02G108500	TraesCS2D02G154300	TraesCS2D02G583000	TraesCS2D02G583200	TraesCS2D02G598000	TraesCS3A02G136300	TraesCS3A02G185900	TraesCS3A02G297200	TraesCS3B02G549000	TraesCS3D02G305300	TraesCS5B02G405300	TraesCS5D02G364600	TraesCS6A02G138000	TraesCS6A02G246400	TraesCS6B02G063800	TraesCS6B02G063900	TraesCS6B02G166200	TraesCS6B02G278100	TraesCS6D02G054900	TraesCS6D02G127100	TraesCS7A02G319100	TraesCS7A02G339600	TraesCS7B02G251100	TraesCS7D02G347300	TraesCS7D02G369400	TraesCS7D02G370400	TraesCS7D02G417400
PL1_3h	phosphatase_activity_(GO:0016791)	72	2.22123	1e-11	TraesCS1A02G210400	TraesCS1A02G358600	TraesCS1B02G095600	TraesCS1B02G224300	TraesCS1B02G375100	TraesCS1D02G213700	TraesCS1D02G274000	TraesCS1D02G363500	TraesCS2A02G000400	TraesCS2A02G087100	TraesCS2A02G141100	TraesCS2A02G348500	TraesCS2A02G428500	TraesCS2B02G023600	TraesCS2B02G101800	TraesCS2B02G166100	TraesCS2B02G366900	TraesCS2B02G449200	TraesCS2D02G000300	TraesCS2D02G084400	TraesCS2D02G346900	TraesCS3A02G209200	TraesCS3A02G237800	TraesCS3A02G249000	TraesCS3A02G287500	TraesCS3A02G362200	TraesCS3B02G096600	TraesCS3B02G234200	TraesCS3B02G240000	TraesCS3B02G275500	TraesCS3B02G277900	TraesCS3B02G359800	TraesCS3B02G394600	TraesCS3D02G212100	TraesCS3D02G238000	TraesCS3D02G249000	TraesCS3D02G323100	TraesCS3D02G355900	TraesCS4A02G094300	TraesCS4A02G230500	TraesCS4A02G244500	TraesCS4A02G380200	TraesCS4B02G210100	TraesCS4B02G298900	TraesCS4D02G069300
PL1_24h	phosphatase_activity_(GO:0016791)	72	2.30776	1e-11	TraesCS1A02G210400	TraesCS1A02G358600	TraesCS1B02G095600	TraesCS1B02G224300	TraesCS1B02G375100	TraesCS1D02G213700	TraesCS1D02G274000	TraesCS1D02G363500	TraesCS2A02G000400	TraesCS2A02G087100	TraesCS2A02G141100	TraesCS2A02G348500	TraesCS2A02G428500	TraesCS2B02G023600	TraesCS2B02G101800	TraesCS2B02G166100	TraesCS2B02G366900	TraesCS2B02G449200	TraesCS2D02G000300	TraesCS2D02G084400	TraesCS2D02G346900	TraesCS3A02G209200	TraesCS3A02G237800	TraesCS3A02G249000	TraesCS3A02G287500	TraesCS3A02G362200	TraesCS3B02G096600	TraesCS3B02G234200	TraesCS3B02G240000	TraesCS3B02G275500	TraesCS3B02G277900	TraesCS3B02G359800	TraesCS3B02G394600	TraesCS3D02G212100	TraesCS3D02G238000	TraesCS3D02G249000	TraesCS3D02G323100	TraesCS3D02G355900	TraesCS4A02G094300	TraesCS4A02G230500	TraesCS4A02G244500	TraesCS4A02G380200	TraesCS4B02G210100	TraesCS4B02G298900	TraesCS4D02G069300
PL6_3h	phosphatase_activity_(GO:0016791)	72	1.60886	0.00874925	TraesCS1A02G210400	TraesCS1A02G358600	TraesCS1B02G095600	TraesCS1B02G224300	TraesCS1B02G375100	TraesCS1D02G213700	TraesCS1D02G274000	TraesCS1D02G363500	TraesCS2A02G000400	TraesCS2A02G087100	TraesCS2A02G141100	TraesCS2A02G348500	TraesCS2A02G428500	TraesCS2B02G023600	TraesCS2B02G101800	TraesCS2B02G166100	TraesCS2B02G366900	TraesCS2B02G449200	TraesCS2D02G000300	TraesCS2D02G084400	TraesCS2D02G346900	TraesCS3A02G209200	TraesCS3A02G237800	TraesCS3A02G249000	TraesCS3A02G287500	TraesCS3A02G362200	TraesCS3B02G096600	TraesCS3B02G234200	TraesCS3B02G240000	TraesCS3B02G275500	TraesCS3B02G277900	TraesCS3B02G359800	TraesCS3B02G394600	TraesCS3D02G212100	TraesCS3D02G238000	TraesCS3D02G249000	TraesCS3D02G323100	TraesCS3D02G355900	TraesCS4A02G094300	TraesCS4A02G230500	TraesCS4A02G244500	TraesCS4A02G380200	TraesCS4B02G210100	TraesCS4B02G298900	TraesCS4D02G069300
PL6_24h	phosphatase_activity_(GO:0016791)	72	1.77793	0.0119234	TraesCS1A02G210400	TraesCS1A02G358600	TraesCS1B02G095600	TraesCS1B02G224300	TraesCS1B02G375100	TraesCS1D02G213700	TraesCS1D02G274000	TraesCS1D02G363500	TraesCS2A02G000400	TraesCS2A02G087100	TraesCS2A02G141100	TraesCS2A02G348500	TraesCS2A02G428500	TraesCS2B02G023600	TraesCS2B02G101800	TraesCS2B02G166100	TraesCS2B02G366900	TraesCS2B02G449200	TraesCS2D02G000300	TraesCS2D02G084400	TraesCS2D02G346900	TraesCS3A02G209200	TraesCS3A02G237800	TraesCS3A02G249000	TraesCS3A02G287500	TraesCS3A02G362200	TraesCS3B02G096600	TraesCS3B02G234200	TraesCS3B02G240000	TraesCS3B02G275500	TraesCS3B02G277900	TraesCS3B02G359800	TraesCS3B02G394600	TraesCS3D02G212100	TraesCS3D02G238000	TraesCS3D02G249000	TraesCS3D02G323100	TraesCS3D02G355900	TraesCS4A02G094300	TraesCS4A02G230500	TraesCS4A02G244500	TraesCS4A02G380200	TraesCS4B02G210100	TraesCS4B02G298900	TraesCS4D02G069300
PL1_3h	photosynthesis_(GO:0015979)	85	-2.16887	0.000423	TraesCS1A02G306600	TraesCS1A02G403300	TraesCS1A02G403800	TraesCS1A02G420900	TraesCS1B02G126900	TraesCS1B02G317500	TraesCS1B02G388200	TraesCS1B02G388300	TraesCS1B02G432700	TraesCS1B02G433300	TraesCS1B02G452100	TraesCS1D02G306200	TraesCS1D02G374900	TraesCS1D02G375000	TraesCS1D02G375100	TraesCS1D02G411300	TraesCS1D02G411600	TraesCS1D02G428800	TraesCS2A02G066700	TraesCS2A02G067000	TraesCS2A02G067100	TraesCS2A02G067200	TraesCS2A02G067300	TraesCS2A02G204800	TraesCS2A02G355600	TraesCS2A02G590600	TraesCS2B02G079400	TraesCS2B02G079500	TraesCS2B02G593000	TraesCS2D02G065200	TraesCS2D02G065300	TraesCS2D02G065400	TraesCS2D02G065600	TraesCS2D02G563600	TraesCS3A02G360500	TraesCS3B02G392800	TraesCS3D02G354300	TraesCS4A02G253300	TraesCS4B02G062100	TraesCS4B02G062200	TraesCS4D02G061100	TraesCS5A02G454200	TraesCS5A02G454300	TraesCS5A02G459200	TraesCS5B02G227900
PL1_24h	photosynthesis_(GO:0015979)	85	-3.23913	1e-11	TraesCS1A02G306600	TraesCS1A02G403300	TraesCS1A02G403800	TraesCS1A02G420900	TraesCS1B02G126900	TraesCS1B02G317500	TraesCS1B02G388200	TraesCS1B02G388300	TraesCS1B02G432700	TraesCS1B02G433300	TraesCS1B02G452100	TraesCS1D02G306200	TraesCS1D02G374900	TraesCS1D02G375000	TraesCS1D02G375100	TraesCS1D02G411300	TraesCS1D02G411600	TraesCS1D02G428800	TraesCS2A02G066700	TraesCS2A02G067000	TraesCS2A02G067100	TraesCS2A02G067200	TraesCS2A02G067300	TraesCS2A02G204800	TraesCS2A02G355600	TraesCS2A02G590600	TraesCS2B02G079400	TraesCS2B02G079500	TraesCS2B02G593000	TraesCS2D02G065200	TraesCS2D02G065300	TraesCS2D02G065400	TraesCS2D02G065600	TraesCS2D02G563600	TraesCS3A02G360500	TraesCS3B02G392800	TraesCS3D02G354300	TraesCS4A02G253300	TraesCS4B02G062100	TraesCS4B02G062200	TraesCS4D02G061100	TraesCS5A02G454200	TraesCS5A02G454300	TraesCS5A02G459200	TraesCS5B02G227900
PL1_48h	photosynthesis_(GO:0015979)	85	-3.17306	1e-11	TraesCS1A02G306600	TraesCS1A02G403300	TraesCS1A02G403800	TraesCS1A02G420900	TraesCS1B02G126900	TraesCS1B02G317500	TraesCS1B02G388200	TraesCS1B02G388300	TraesCS1B02G432700	TraesCS1B02G433300	TraesCS1B02G452100	TraesCS1D02G306200	TraesCS1D02G374900	TraesCS1D02G375000	TraesCS1D02G375100	TraesCS1D02G411300	TraesCS1D02G411600	TraesCS1D02G428800	TraesCS2A02G066700	TraesCS2A02G067000	TraesCS2A02G067100	TraesCS2A02G067200	TraesCS2A02G067300	TraesCS2A02G204800	TraesCS2A02G355600	TraesCS2A02G590600	TraesCS2B02G079400	TraesCS2B02G079500	TraesCS2B02G593000	TraesCS2D02G065200	TraesCS2D02G065300	TraesCS2D02G065400	TraesCS2D02G065600	TraesCS2D02G563600	TraesCS3A02G360500	TraesCS3B02G392800	TraesCS3D02G354300	TraesCS4A02G253300	TraesCS4B02G062100	TraesCS4B02G062200	TraesCS4D02G061100	TraesCS5A02G454200	TraesCS5A02G454300	TraesCS5A02G459200	TraesCS5B02G227900
PL6_24h	photosynthesis_(GO:0015979)	85	-3.89543	1e-11	TraesCS1A02G306600	TraesCS1A02G403300	TraesCS1A02G403800	TraesCS1A02G420900	TraesCS1B02G126900	TraesCS1B02G317500	TraesCS1B02G388200	TraesCS1B02G388300	TraesCS1B02G432700	TraesCS1B02G433300	TraesCS1B02G452100	TraesCS1D02G306200	TraesCS1D02G374900	TraesCS1D02G375000	TraesCS1D02G375100	TraesCS1D02G411300	TraesCS1D02G411600	TraesCS1D02G428800	TraesCS2A02G066700	TraesCS2A02G067000	TraesCS2A02G067100	TraesCS2A02G067200	TraesCS2A02G067300	TraesCS2A02G204800	TraesCS2A02G355600	TraesCS2A02G590600	TraesCS2B02G079400	TraesCS2B02G079500	TraesCS2B02G593000	TraesCS2D02G065200	TraesCS2D02G065300	TraesCS2D02G065400	TraesCS2D02G065600	TraesCS2D02G563600	TraesCS3A02G360500	TraesCS3B02G392800	TraesCS3D02G354300	TraesCS4A02G253300	TraesCS4B02G062100	TraesCS4B02G062200	TraesCS4D02G061100	TraesCS5A02G454200	TraesCS5A02G454300	TraesCS5A02G459200	TraesCS5B02G227900
PL6_48h	photosynthesis_(GO:0015979)	85	-3.91035	1e-11	TraesCS1A02G306600	TraesCS1A02G403300	TraesCS1A02G403800	TraesCS1A02G420900	TraesCS1B02G126900	TraesCS1B02G317500	TraesCS1B02G388200	TraesCS1B02G388300	TraesCS1B02G432700	TraesCS1B02G433300	TraesCS1B02G452100	TraesCS1D02G306200	TraesCS1D02G374900	TraesCS1D02G375000	TraesCS1D02G375100	TraesCS1D02G411300	TraesCS1D02G411600	TraesCS1D02G428800	TraesCS2A02G066700	TraesCS2A02G067000	TraesCS2A02G067100	TraesCS2A02G067200	TraesCS2A02G067300	TraesCS2A02G204800	TraesCS2A02G355600	TraesCS2A02G590600	TraesCS2B02G079400	TraesCS2B02G079500	TraesCS2B02G593000	TraesCS2D02G065200	TraesCS2D02G065300	TraesCS2D02G065400	TraesCS2D02G065600	TraesCS2D02G563600	TraesCS3A02G360500	TraesCS3B02G392800	TraesCS3D02G354300	TraesCS4A02G253300	TraesCS4B02G062100	TraesCS4B02G062200	TraesCS4D02G061100	TraesCS5A02G454200	TraesCS5A02G454300	TraesCS5A02G459200	TraesCS5B02G227900
PL6_24h	positive_regulation_of_biological_process_(GO:0048518)	43	1.59271	0.0314649	TraesCS1A02G184900	TraesCS1A02G255100	TraesCS1B02G100800	TraesCS1B02G105100	TraesCS1B02G265900	TraesCS1D02G254500	TraesCS1D02G441400	TraesCS2A02G581600	TraesCS2D02G259300	TraesCS2D02G598500	TraesCS3A02G291900	TraesCS3A02G298300	TraesCS3A02G345200	TraesCS3A02G406000	TraesCS3B02G326500	TraesCS3B02G377300	TraesCS3B02G439600	TraesCS3D02G303700	TraesCS3D02G339300	TraesCS3D02G401200	TraesCS3D02G428000	TraesCS4A02G094900	TraesCS4A02G328700	TraesCS4B02G098200	TraesCS4B02G351500	TraesCS4D02G346300	TraesCS5A02G247200	TraesCS5A02G520200	TraesCS5B02G332300	TraesCS6A02G333600	TraesCS6B02G017900	TraesCS6B02G209600	TraesCS6B02G284300	TraesCS6B02G364000	TraesCS6D02G167800	TraesCS6D02G293200	TraesCS6D02G312800	TraesCS7A02G170600	TraesCS7B02G008400	TraesCS7B02G075600	TraesCS7B02G272500	TraesCS7D02G032700	TraesCS7D02G171300
PL1_3h	protein_serine/threonine_phosphatase_activity_(GO:0004722)	38	2.33818	1e-11	TraesCS1A02G358600	TraesCS1B02G095600	TraesCS1B02G375100	TraesCS1D02G363500	TraesCS2A02G000400	TraesCS2A02G087100	TraesCS2A02G428500	TraesCS2B02G101800	TraesCS2B02G449200	TraesCS2D02G000300	TraesCS2D02G084400	TraesCS3A02G209200	TraesCS3A02G237800	TraesCS3A02G249000	TraesCS3A02G362200	TraesCS3B02G234200	TraesCS3B02G240000	TraesCS3B02G277900	TraesCS3B02G394600	TraesCS3D02G212100	TraesCS3D02G249000	TraesCS3D02G355900	TraesCS4A02G094300	TraesCS4B02G210100	TraesCS4D02G210900	TraesCS5A02G181600	TraesCS5A02G183600	TraesCS5A02G479600	TraesCS5B02G078500	TraesCS5B02G182000	TraesCS5B02G362300	TraesCS5D02G188600	TraesCS5D02G369200	TraesCS6A02G363900	TraesCS6B02G216900	TraesCS6B02G398500	TraesCS6D02G218000	TraesCS7D02G417600
PL1_24h	protein_serine/threonine_phosphatase_activity_(GO:0004722)	38	2.30398	1e-11	TraesCS1A02G358600	TraesCS1B02G095600	TraesCS1B02G375100	TraesCS1D02G363500	TraesCS2A02G000400	TraesCS2A02G087100	TraesCS2A02G428500	TraesCS2B02G101800	TraesCS2B02G449200	TraesCS2D02G000300	TraesCS2D02G084400	TraesCS3A02G209200	TraesCS3A02G237800	TraesCS3A02G249000	TraesCS3A02G362200	TraesCS3B02G234200	TraesCS3B02G240000	TraesCS3B02G277900	TraesCS3B02G394600	TraesCS3D02G212100	TraesCS3D02G249000	TraesCS3D02G355900	TraesCS4A02G094300	TraesCS4B02G210100	TraesCS4D02G210900	TraesCS5A02G181600	TraesCS5A02G183600	TraesCS5A02G479600	TraesCS5B02G078500	TraesCS5B02G182000	TraesCS5B02G362300	TraesCS5D02G188600	TraesCS5D02G369200	TraesCS6A02G363900	TraesCS6B02G216900	TraesCS6B02G398500	TraesCS6D02G218000	TraesCS7D02G417600
PL6_3h	protein_serine/threonine_phosphatase_activity_(GO:0004722)	38	1.90733	1e-11	TraesCS1A02G358600	TraesCS1B02G095600	TraesCS1B02G375100	TraesCS1D02G363500	TraesCS2A02G000400	TraesCS2A02G087100	TraesCS2A02G428500	TraesCS2B02G101800	TraesCS2B02G449200	TraesCS2D02G000300	TraesCS2D02G084400	TraesCS3A02G209200	TraesCS3A02G237800	TraesCS3A02G249000	TraesCS3A02G362200	TraesCS3B02G234200	TraesCS3B02G240000	TraesCS3B02G277900	TraesCS3B02G394600	TraesCS3D02G212100	TraesCS3D02G249000	TraesCS3D02G355900	TraesCS4A02G094300	TraesCS4B02G210100	TraesCS4D02G210900	TraesCS5A02G181600	TraesCS5A02G183600	TraesCS5A02G479600	TraesCS5B02G078500	TraesCS5B02G182000	TraesCS5B02G362300	TraesCS5D02G188600	TraesCS5D02G369200	TraesCS6A02G363900	TraesCS6B02G216900	TraesCS6B02G398500	TraesCS6D02G218000	TraesCS7D02G417600
PL6_24h	protein_serine/threonine_phosphatase_activity_(GO:0004722)	38	1.81347	0.00880613	TraesCS1A02G358600	TraesCS1B02G095600	TraesCS1B02G375100	TraesCS1D02G363500	TraesCS2A02G000400	TraesCS2A02G087100	TraesCS2A02G428500	TraesCS2B02G101800	TraesCS2B02G449200	TraesCS2D02G000300	TraesCS2D02G084400	TraesCS3A02G209200	TraesCS3A02G237800	TraesCS3A02G249000	TraesCS3A02G362200	TraesCS3B02G234200	TraesCS3B02G240000	TraesCS3B02G277900	TraesCS3B02G394600	TraesCS3D02G212100	TraesCS3D02G249000	TraesCS3D02G355900	TraesCS4A02G094300	TraesCS4B02G210100	TraesCS4D02G210900	TraesCS5A02G181600	TraesCS5A02G183600	TraesCS5A02G479600	TraesCS5B02G078500	TraesCS5B02G182000	TraesCS5B02G362300	TraesCS5D02G188600	TraesCS5D02G369200	TraesCS6A02G363900	TraesCS6B02G216900	TraesCS6B02G398500	TraesCS6D02G218000	TraesCS7D02G417600
PL1_24h	protein-containing_complex_(GO:0032991)	108	-2.39899	1e-11	TraesCS1A02G403300	TraesCS1A02G403800	TraesCS1B02G048900	TraesCS1B02G049100	TraesCS1B02G056700	TraesCS1B02G100800	TraesCS1B02G133100	TraesCS1B02G149000	TraesCS1B02G375000	TraesCS1B02G432700	TraesCS1D02G236300	TraesCS1D02G286700	TraesCS1D02G312600	TraesCS1D02G375000	TraesCS1D02G405300	TraesCS1D02G411300	TraesCS1D02G411600	TraesCS2A02G027000	TraesCS2A02G204700	TraesCS2A02G204800	TraesCS2A02G355600	TraesCS2B02G044300	TraesCS2B02G232300	TraesCS2B02G520200	TraesCS2D02G211200	TraesCS2D02G461500	TraesCS2D02G492200	TraesCS2D02G492300	TraesCS2D02G542500	TraesCS2D02G596000	TraesCS3A02G209500	TraesCS3A02G360500	TraesCS3B02G003200	TraesCS3B02G006500	TraesCS3B02G007200	TraesCS3B02G266000	TraesCS3B02G330900	TraesCS3B02G335000	TraesCS3B02G342900	TraesCS3B02G385000	TraesCS3B02G392800	TraesCS3D02G248700	TraesCS3D02G354300	TraesCS4A02G229400	TraesCS4A02G253300
PL1_48h	protein-containing_complex_(GO:0032991)	108	-2.09079	0.000322	TraesCS1A02G403300	TraesCS1A02G403800	TraesCS1B02G048900	TraesCS1B02G049100	TraesCS1B02G056700	TraesCS1B02G100800	TraesCS1B02G133100	TraesCS1B02G149000	TraesCS1B02G375000	TraesCS1B02G432700	TraesCS1D02G236300	TraesCS1D02G286700	TraesCS1D02G312600	TraesCS1D02G375000	TraesCS1D02G405300	TraesCS1D02G411300	TraesCS1D02G411600	TraesCS2A02G027000	TraesCS2A02G204700	TraesCS2A02G204800	TraesCS2A02G355600	TraesCS2B02G044300	TraesCS2B02G232300	TraesCS2B02G520200	TraesCS2D02G211200	TraesCS2D02G461500	TraesCS2D02G492200	TraesCS2D02G492300	TraesCS2D02G542500	TraesCS2D02G596000	TraesCS3A02G209500	TraesCS3A02G360500	TraesCS3B02G003200	TraesCS3B02G006500	TraesCS3B02G007200	TraesCS3B02G266000	TraesCS3B02G330900	TraesCS3B02G335000	TraesCS3B02G342900	TraesCS3B02G385000	TraesCS3B02G392800	TraesCS3D02G248700	TraesCS3D02G354300	TraesCS4A02G229400	TraesCS4A02G253300
PL6_24h	protein-containing_complex_(GO:0032991)	108	-1.72994	0.019902	TraesCS1A02G403300	TraesCS1A02G403800	TraesCS1B02G048900	TraesCS1B02G049100	TraesCS1B02G056700	TraesCS1B02G100800	TraesCS1B02G133100	TraesCS1B02G149000	TraesCS1B02G375000	TraesCS1B02G432700	TraesCS1D02G236300	TraesCS1D02G286700	TraesCS1D02G312600	TraesCS1D02G375000	TraesCS1D02G405300	TraesCS1D02G411300	TraesCS1D02G411600	TraesCS2A02G027000	TraesCS2A02G204700	TraesCS2A02G204800	TraesCS2A02G355600	TraesCS2B02G044300	TraesCS2B02G232300	TraesCS2B02G520200	TraesCS2D02G211200	TraesCS2D02G461500	TraesCS2D02G492200	TraesCS2D02G492300	TraesCS2D02G542500	TraesCS2D02G596000	TraesCS3A02G209500	TraesCS3A02G360500	TraesCS3B02G003200	TraesCS3B02G006500	TraesCS3B02G007200	TraesCS3B02G266000	TraesCS3B02G330900	TraesCS3B02G335000	TraesCS3B02G342900	TraesCS3B02G385000	TraesCS3B02G392800	TraesCS3D02G248700	TraesCS3D02G354300	TraesCS4A02G229400	TraesCS4A02G253300
PL6_48h	protein-containing_complex_(GO:0032991)	108	-1.88096	0.0103043	TraesCS1A02G403300	TraesCS1A02G403800	TraesCS1B02G048900	TraesCS1B02G049100	TraesCS1B02G056700	TraesCS1B02G100800	TraesCS1B02G133100	TraesCS1B02G149000	TraesCS1B02G375000	TraesCS1B02G432700	TraesCS1D02G236300	TraesCS1D02G286700	TraesCS1D02G312600	TraesCS1D02G375000	TraesCS1D02G405300	TraesCS1D02G411300	TraesCS1D02G411600	TraesCS2A02G027000	TraesCS2A02G204700	TraesCS2A02G204800	TraesCS2A02G355600	TraesCS2B02G044300	TraesCS2B02G232300	TraesCS2B02G520200	TraesCS2D02G211200	TraesCS2D02G461500	TraesCS2D02G492200	TraesCS2D02G492300	TraesCS2D02G542500	TraesCS2D02G596000	TraesCS3A02G209500	TraesCS3A02G360500	TraesCS3B02G003200	TraesCS3B02G006500	TraesCS3B02G007200	TraesCS3B02G266000	TraesCS3B02G330900	TraesCS3B02G335000	TraesCS3B02G342900	TraesCS3B02G385000	TraesCS3B02G392800	TraesCS3D02G248700	TraesCS3D02G354300	TraesCS4A02G229400	TraesCS4A02G253300
PL1_3h	reactive_oxygen_species_metabolic_process_(GO:0072593)	42	-1.81356	0.0182019	TraesCS1A02G108400	TraesCS1B02G095800	TraesCS1B02G096200	TraesCS1B02G096900	TraesCS1B02G115900	TraesCS1B02G374500	TraesCS1D02G080300	TraesCS2A02G107600	TraesCS2A02G571300	TraesCS2A02G573900	TraesCS2B02G124600	TraesCS2B02G124800	TraesCS2B02G125800	TraesCS2B02G126200	TraesCS2B02G615600	TraesCS2B02G615800	TraesCS2D02G107600	TraesCS2D02G108500	TraesCS2D02G583000	TraesCS2D02G583200	TraesCS3A02G136300	TraesCS3A02G185900	TraesCS3A02G297200	TraesCS3A02G328000	TraesCS3B02G357500	TraesCS3D02G305300	TraesCS3D02G321500	TraesCS5B02G405300	TraesCS5D02G364600	TraesCS6A02G138000	TraesCS6B02G063800	TraesCS6B02G063900	TraesCS6B02G166200	TraesCS6D02G054900	TraesCS6D02G127100	TraesCS7A02G319100	TraesCS7A02G339600	TraesCS7B02G251100	TraesCS7D02G347300	TraesCS7D02G369400	TraesCS7D02G370400	TraesCS7D02G417400
PL1_24h	reactive_oxygen_species_metabolic_process_(GO:0072593)	42	-2.23213	6.22e-05	TraesCS1A02G108400	TraesCS1B02G095800	TraesCS1B02G096200	TraesCS1B02G096900	TraesCS1B02G115900	TraesCS1B02G374500	TraesCS1D02G080300	TraesCS2A02G107600	TraesCS2A02G571300	TraesCS2A02G573900	TraesCS2B02G124600	TraesCS2B02G124800	TraesCS2B02G125800	TraesCS2B02G126200	TraesCS2B02G615600	TraesCS2B02G615800	TraesCS2D02G107600	TraesCS2D02G108500	TraesCS2D02G583000	TraesCS2D02G583200	TraesCS3A02G136300	TraesCS3A02G185900	TraesCS3A02G297200	TraesCS3A02G328000	TraesCS3B02G357500	TraesCS3D02G305300	TraesCS3D02G321500	TraesCS5B02G405300	TraesCS5D02G364600	TraesCS6A02G138000	TraesCS6B02G063800	TraesCS6B02G063900	TraesCS6B02G166200	TraesCS6D02G054900	TraesCS6D02G127100	TraesCS7A02G319100	TraesCS7A02G339600	TraesCS7B02G251100	TraesCS7D02G347300	TraesCS7D02G369400	TraesCS7D02G370400	TraesCS7D02G417400
PL6_24h	reactive_oxygen_species_metabolic_process_(GO:0072593)	42	-2.22327	0.000552	TraesCS1A02G108400	TraesCS1B02G095800	TraesCS1B02G096200	TraesCS1B02G096900	TraesCS1B02G115900	TraesCS1B02G374500	TraesCS1D02G080300	TraesCS2A02G107600	TraesCS2A02G571300	TraesCS2A02G573900	TraesCS2B02G124600	TraesCS2B02G124800	TraesCS2B02G125800	TraesCS2B02G126200	TraesCS2B02G615600	TraesCS2B02G615800	TraesCS2D02G107600	TraesCS2D02G108500	TraesCS2D02G583000	TraesCS2D02G583200	TraesCS3A02G136300	TraesCS3A02G185900	TraesCS3A02G297200	TraesCS3A02G328000	TraesCS3B02G357500	TraesCS3D02G305300	TraesCS3D02G321500	TraesCS5B02G405300	TraesCS5D02G364600	TraesCS6A02G138000	TraesCS6B02G063800	TraesCS6B02G063900	TraesCS6B02G166200	TraesCS6D02G054900	TraesCS6D02G127100	TraesCS7A02G319100	TraesCS7A02G339600	TraesCS7B02G251100	TraesCS7D02G347300	TraesCS7D02G369400	TraesCS7D02G370400	TraesCS7D02G417400
PL6_48h	reactive_oxygen_species_metabolic_process_(GO:0072593)	42	1.73111	0.0105601	TraesCS1A02G108400	TraesCS1B02G095800	TraesCS1B02G096200	TraesCS1B02G096900	TraesCS1B02G115900	TraesCS1B02G374500	TraesCS1D02G080300	TraesCS2A02G107600	TraesCS2A02G571300	TraesCS2A02G573900	TraesCS2B02G124600	TraesCS2B02G124800	TraesCS2B02G125800	TraesCS2B02G126200	TraesCS2B02G615600	TraesCS2B02G615800	TraesCS2D02G107600	TraesCS2D02G108500	TraesCS2D02G583000	TraesCS2D02G583200	TraesCS3A02G136300	TraesCS3A02G185900	TraesCS3A02G297200	TraesCS3A02G328000	TraesCS3B02G357500	TraesCS3D02G305300	TraesCS3D02G321500	TraesCS5B02G405300	TraesCS5D02G364600	TraesCS6A02G138000	TraesCS6B02G063800	TraesCS6B02G063900	TraesCS6B02G166200	TraesCS6D02G054900	TraesCS6D02G127100	TraesCS7A02G319100	TraesCS7A02G339600	TraesCS7B02G251100	TraesCS7D02G347300	TraesCS7D02G369400	TraesCS7D02G370400	TraesCS7D02G417400
PL1_3h	regulation_of_gene_expression_(GO:0010468)	196	1.62819	0.0343154	TraesCS1A02G070400	TraesCS1A02G076900	TraesCS1A02G218100	TraesCS1A02G263700	TraesCS1A02G276800	TraesCS1A02G409800	TraesCS1A02G411100	TraesCS1A02G426700	TraesCS1B02G051600	TraesCS1B02G088900	TraesCS1B02G095000	TraesCS1B02G100800	TraesCS1B02G138100	TraesCS1B02G274300	TraesCS1B02G439800	TraesCS1B02G441300	TraesCS1B02G461600	TraesCS1D02G072900	TraesCS1D02G079100	TraesCS1D02G263800	TraesCS1D02G417100	TraesCS1D02G418900	TraesCS1D02G436500	TraesCS2A02G116100	TraesCS2A02G322400	TraesCS2A02G323000	TraesCS2A02G348900	TraesCS2A02G389400	TraesCS2A02G427700	TraesCS2B02G202700	TraesCS2B02G232000	TraesCS2B02G289900	TraesCS2B02G359600	TraesCS2B02G360400	TraesCS2B02G407600	TraesCS2B02G419600	TraesCS2B02G448100	TraesCS2B02G517400	TraesCS2B02G543800	TraesCS2D02G146100	TraesCS2D02G183700	TraesCS2D02G339900	TraesCS2D02G369900	TraesCS2D02G387300	TraesCS2D02G414600
PL1_24h	regulation_of_gene_expression_(GO:0010468)	196	1.8924	0.00843499	TraesCS1A02G070400	TraesCS1A02G076900	TraesCS1A02G218100	TraesCS1A02G263700	TraesCS1A02G276800	TraesCS1A02G409800	TraesCS1A02G411100	TraesCS1A02G426700	TraesCS1B02G051600	TraesCS1B02G088900	TraesCS1B02G095000	TraesCS1B02G100800	TraesCS1B02G138100	TraesCS1B02G274300	TraesCS1B02G439800	TraesCS1B02G441300	TraesCS1B02G461600	TraesCS1D02G072900	TraesCS1D02G079100	TraesCS1D02G263800	TraesCS1D02G417100	TraesCS1D02G418900	TraesCS1D02G436500	TraesCS2A02G116100	TraesCS2A02G322400	TraesCS2A02G323000	TraesCS2A02G348900	TraesCS2A02G389400	TraesCS2A02G427700	TraesCS2B02G202700	TraesCS2B02G232000	TraesCS2B02G289900	TraesCS2B02G359600	TraesCS2B02G360400	TraesCS2B02G407600	TraesCS2B02G419600	TraesCS2B02G448100	TraesCS2B02G517400	TraesCS2B02G543800	TraesCS2D02G146100	TraesCS2D02G183700	TraesCS2D02G339900	TraesCS2D02G369900	TraesCS2D02G387300	TraesCS2D02G414600
PL6_24h	regulation_of_gene_expression_(GO:0010468)	196	1.6097	0.0291987	TraesCS1A02G070400	TraesCS1A02G076900	TraesCS1A02G218100	TraesCS1A02G263700	TraesCS1A02G276800	TraesCS1A02G409800	TraesCS1A02G411100	TraesCS1A02G426700	TraesCS1B02G051600	TraesCS1B02G088900	TraesCS1B02G095000	TraesCS1B02G100800	TraesCS1B02G138100	TraesCS1B02G274300	TraesCS1B02G439800	TraesCS1B02G441300	TraesCS1B02G461600	TraesCS1D02G072900	TraesCS1D02G079100	TraesCS1D02G263800	TraesCS1D02G417100	TraesCS1D02G418900	TraesCS1D02G436500	TraesCS2A02G116100	TraesCS2A02G322400	TraesCS2A02G323000	TraesCS2A02G348900	TraesCS2A02G389400	TraesCS2A02G427700	TraesCS2B02G202700	TraesCS2B02G232000	TraesCS2B02G289900	TraesCS2B02G359600	TraesCS2B02G360400	TraesCS2B02G407600	TraesCS2B02G419600	TraesCS2B02G448100	TraesCS2B02G517400	TraesCS2B02G543800	TraesCS2D02G146100	TraesCS2D02G183700	TraesCS2D02G339900	TraesCS2D02G369900	TraesCS2D02G387300	TraesCS2D02G414600
PL1_3h	response_to_abiotic_stimulus_(GO:0009628)	138	1.88003	0.00299964	TraesCS1A02G215500	TraesCS1A02G223300	TraesCS1A02G403300	TraesCS1A02G423800	TraesCS1B02G145800	TraesCS1B02G229000	TraesCS1B02G236600	TraesCS1B02G347600	TraesCS1B02G352400	TraesCS1B02G374500	TraesCS1B02G432700	TraesCS1D02G184500	TraesCS1D02G218000	TraesCS1D02G286700	TraesCS1D02G336900	TraesCS1D02G411300	TraesCS1D02G411600	TraesCS1D02G432400	TraesCS2A02G121000	TraesCS2A02G348900	TraesCS2A02G432700	TraesCS2A02G515700	TraesCS2B02G141900	TraesCS2B02G213400	TraesCS2B02G247300	TraesCS2B02G553600	TraesCS3A02G109300	TraesCS3A02G116300	TraesCS3A02G148700	TraesCS3A02G150800	TraesCS3A02G280800	TraesCS3A02G291900	TraesCS3A02G328000	TraesCS3A02G342900	TraesCS3A02G365600	TraesCS3A02G400400	TraesCS3A02G406000	TraesCS3B02G048800	TraesCS3B02G135400	TraesCS3B02G166100	TraesCS3B02G297200	TraesCS3B02G314600	TraesCS3B02G326500	TraesCS3B02G357500	TraesCS3B02G397400
PL1_24h	response_to_abiotic_stimulus_(GO:0009628)	138	2.12306	0.000696	TraesCS1A02G215500	TraesCS1A02G223300	TraesCS1A02G403300	TraesCS1A02G423800	TraesCS1B02G145800	TraesCS1B02G229000	TraesCS1B02G236600	TraesCS1B02G347600	TraesCS1B02G352400	TraesCS1B02G374500	TraesCS1B02G432700	TraesCS1D02G184500	TraesCS1D02G218000	TraesCS1D02G286700	TraesCS1D02G336900	TraesCS1D02G411300	TraesCS1D02G411600	TraesCS1D02G432400	TraesCS2A02G121000	TraesCS2A02G348900	TraesCS2A02G432700	TraesCS2A02G515700	TraesCS2B02G141900	TraesCS2B02G213400	TraesCS2B02G247300	TraesCS2B02G553600	TraesCS3A02G109300	TraesCS3A02G116300	TraesCS3A02G148700	TraesCS3A02G150800	TraesCS3A02G280800	TraesCS3A02G291900	TraesCS3A02G328000	TraesCS3A02G342900	TraesCS3A02G365600	TraesCS3A02G400400	TraesCS3A02G406000	TraesCS3B02G048800	TraesCS3B02G135400	TraesCS3B02G166100	TraesCS3B02G297200	TraesCS3B02G314600	TraesCS3B02G326500	TraesCS3B02G357500	TraesCS3B02G397400
PL6_24h	response_to_abiotic_stimulus_(GO:0009628)	138	1.68213	0.0182348	TraesCS1A02G215500	TraesCS1A02G223300	TraesCS1A02G403300	TraesCS1A02G423800	TraesCS1B02G145800	TraesCS1B02G229000	TraesCS1B02G236600	TraesCS1B02G347600	TraesCS1B02G352400	TraesCS1B02G374500	TraesCS1B02G432700	TraesCS1D02G184500	TraesCS1D02G218000	TraesCS1D02G286700	TraesCS1D02G336900	TraesCS1D02G411300	TraesCS1D02G411600	TraesCS1D02G432400	TraesCS2A02G121000	TraesCS2A02G348900	TraesCS2A02G432700	TraesCS2A02G515700	TraesCS2B02G141900	TraesCS2B02G213400	TraesCS2B02G247300	TraesCS2B02G553600	TraesCS3A02G109300	TraesCS3A02G116300	TraesCS3A02G148700	TraesCS3A02G150800	TraesCS3A02G280800	TraesCS3A02G291900	TraesCS3A02G328000	TraesCS3A02G342900	TraesCS3A02G365600	TraesCS3A02G400400	TraesCS3A02G406000	TraesCS3B02G048800	TraesCS3B02G135400	TraesCS3B02G166100	TraesCS3B02G297200	TraesCS3B02G314600	TraesCS3B02G326500	TraesCS3B02G357500	TraesCS3B02G397400
PL1_3h	response_to_abscisic_acid_(GO:0009737)	45	2.17311	1e-11	TraesCS1A02G175500	TraesCS1B02G145800	TraesCS1D02G163800	TraesCS1D02G195300	TraesCS2A02G199300	TraesCS2D02G206900	TraesCS3A02G280800	TraesCS3A02G328000	TraesCS3B02G314600	TraesCS3B02G357500	TraesCS3D02G280600	TraesCS3D02G321500	TraesCS4A02G216900	TraesCS4A02G244500	TraesCS4B02G234800	TraesCS4D02G069300	TraesCS4D02G092000	TraesCS5A02G375000	TraesCS5A02G424800	TraesCS5B02G376900	TraesCS5B02G408300	TraesCS5B02G502200	TraesCS5D02G379300	TraesCS5D02G384500	TraesCS5D02G503400	TraesCS6A02G253300	TraesCS6A02G333600	TraesCS6A02G350300	TraesCS6A02G350700	TraesCS6A02G418300	TraesCS6B02G175100	TraesCS6B02G364000	TraesCS6B02G383500	TraesCS6D02G136200	TraesCS6D02G234700	TraesCS6D02G312800	TraesCS6D02G332700	TraesCS6D02G332900	TraesCS6D02G403400	TraesCS7A02G170600	TraesCS7A02G560000	TraesCS7B02G075600	TraesCS7D02G171300	TraesCS7D02G549900	TraesCSU02G072000
PL1_24h	response_to_abscisic_acid_(GO:0009737)	45	2.50905	1e-11	TraesCS1A02G175500	TraesCS1B02G145800	TraesCS1D02G163800	TraesCS1D02G195300	TraesCS2A02G199300	TraesCS2D02G206900	TraesCS3A02G280800	TraesCS3A02G328000	TraesCS3B02G314600	TraesCS3B02G357500	TraesCS3D02G280600	TraesCS3D02G321500	TraesCS4A02G216900	TraesCS4A02G244500	TraesCS4B02G234800	TraesCS4D02G069300	TraesCS4D02G092000	TraesCS5A02G375000	TraesCS5A02G424800	TraesCS5B02G376900	TraesCS5B02G408300	TraesCS5B02G502200	TraesCS5D02G379300	TraesCS5D02G384500	TraesCS5D02G503400	TraesCS6A02G253300	TraesCS6A02G333600	TraesCS6A02G350300	TraesCS6A02G350700	TraesCS6A02G418300	TraesCS6B02G175100	TraesCS6B02G364000	TraesCS6B02G383500	TraesCS6D02G136200	TraesCS6D02G234700	TraesCS6D02G312800	TraesCS6D02G332700	TraesCS6D02G332900	TraesCS6D02G403400	TraesCS7A02G170600	TraesCS7A02G560000	TraesCS7B02G075600	TraesCS7D02G171300	TraesCS7D02G549900	TraesCSU02G072000
PL1_48h	response_to_abscisic_acid_(GO:0009737)	45	1.86473	0.0158413	TraesCS1A02G175500	TraesCS1B02G145800	TraesCS1D02G163800	TraesCS1D02G195300	TraesCS2A02G199300	TraesCS2D02G206900	TraesCS3A02G280800	TraesCS3A02G328000	TraesCS3B02G314600	TraesCS3B02G357500	TraesCS3D02G280600	TraesCS3D02G321500	TraesCS4A02G216900	TraesCS4A02G244500	TraesCS4B02G234800	TraesCS4D02G069300	TraesCS4D02G092000	TraesCS5A02G375000	TraesCS5A02G424800	TraesCS5B02G376900	TraesCS5B02G408300	TraesCS5B02G502200	TraesCS5D02G379300	TraesCS5D02G384500	TraesCS5D02G503400	TraesCS6A02G253300	TraesCS6A02G333600	TraesCS6A02G350300	TraesCS6A02G350700	TraesCS6A02G418300	TraesCS6B02G175100	TraesCS6B02G364000	TraesCS6B02G383500	TraesCS6D02G136200	TraesCS6D02G234700	TraesCS6D02G312800	TraesCS6D02G332700	TraesCS6D02G332900	TraesCS6D02G403400	TraesCS7A02G170600	TraesCS7A02G560000	TraesCS7B02G075600	TraesCS7D02G171300	TraesCS7D02G549900	TraesCSU02G072000
PL6_3h	response_to_abscisic_acid_(GO:0009737)	45	1.65139	0.00403462	TraesCS1A02G175500	TraesCS1B02G145800	TraesCS1D02G163800	TraesCS1D02G195300	TraesCS2A02G199300	TraesCS2D02G206900	TraesCS3A02G280800	TraesCS3A02G328000	TraesCS3B02G314600	TraesCS3B02G357500	TraesCS3D02G280600	TraesCS3D02G321500	TraesCS4A02G216900	TraesCS4A02G244500	TraesCS4B02G234800	TraesCS4D02G069300	TraesCS4D02G092000	TraesCS5A02G375000	TraesCS5A02G424800	TraesCS5B02G376900	TraesCS5B02G408300	TraesCS5B02G502200	TraesCS5D02G379300	TraesCS5D02G384500	TraesCS5D02G503400	TraesCS6A02G253300	TraesCS6A02G333600	TraesCS6A02G350300	TraesCS6A02G350700	TraesCS6A02G418300	TraesCS6B02G175100	TraesCS6B02G364000	TraesCS6B02G383500	TraesCS6D02G136200	TraesCS6D02G234700	TraesCS6D02G312800	TraesCS6D02G332700	TraesCS6D02G332900	TraesCS6D02G403400	TraesCS7A02G170600	TraesCS7A02G560000	TraesCS7B02G075600	TraesCS7D02G171300	TraesCS7D02G549900	TraesCSU02G072000
PL6_24h	response_to_abscisic_acid_(GO:0009737)	45	1.89803	0.00271894	TraesCS1A02G175500	TraesCS1B02G145800	TraesCS1D02G163800	TraesCS1D02G195300	TraesCS2A02G199300	TraesCS2D02G206900	TraesCS3A02G280800	TraesCS3A02G328000	TraesCS3B02G314600	TraesCS3B02G357500	TraesCS3D02G280600	TraesCS3D02G321500	TraesCS4A02G216900	TraesCS4A02G244500	TraesCS4B02G234800	TraesCS4D02G069300	TraesCS4D02G092000	TraesCS5A02G375000	TraesCS5A02G424800	TraesCS5B02G376900	TraesCS5B02G408300	TraesCS5B02G502200	TraesCS5D02G379300	TraesCS5D02G384500	TraesCS5D02G503400	TraesCS6A02G253300	TraesCS6A02G333600	TraesCS6A02G350300	TraesCS6A02G350700	TraesCS6A02G418300	TraesCS6B02G175100	TraesCS6B02G364000	TraesCS6B02G383500	TraesCS6D02G136200	TraesCS6D02G234700	TraesCS6D02G312800	TraesCS6D02G332700	TraesCS6D02G332900	TraesCS6D02G403400	TraesCS7A02G170600	TraesCS7A02G560000	TraesCS7B02G075600	TraesCS7D02G171300	TraesCS7D02G549900	TraesCSU02G072000
PL6_48h	response_to_biotic_stimulus_(GO:0009607)	57	1.95606	0.000316	TraesCS1A02G184900	TraesCS1A02G261400	TraesCS1A02G355300	TraesCS1B02G037100	TraesCS1B02G050200	TraesCS1D02G261400	TraesCS2A02G037400	TraesCS2A02G297100	TraesCS2A02G515700	TraesCS2A02G581600	TraesCS2B02G048700	TraesCS2B02G313300	TraesCS2B02G581900	TraesCS2B02G582000	TraesCS2B02G582100	TraesCS2D02G033100	TraesCS2D02G150500	TraesCS2D02G259300	TraesCS2D02G295000	TraesCS2D02G552100	TraesCS2D02G598500	TraesCS3A02G105400	TraesCS3A02G229700	TraesCS3A02G260100	TraesCS3A02G260200	TraesCS3A02G328000	TraesCS3A02G406000	TraesCS3A02G517100	TraesCS3B02G259000	TraesCS3B02G293200	TraesCS3B02G337700	TraesCS3B02G357500	TraesCS3B02G439600	TraesCS3B02G584700	TraesCS3D02G260300	TraesCS3D02G321500	TraesCS3D02G401200	TraesCS3D02G475200	TraesCS3D02G524700	TraesCS4B02G234800	TraesCS4B02G322700	TraesCS4D02G264500	TraesCS5A02G183300	TraesCS5B02G181500	TraesCS6A02G403200
PL1_3h	response_to_endogenous_stimulus_(GO:0009719)	73	2.00651	0.000477	TraesCS1A02G175500	TraesCS1A02G255100	TraesCS1B02G038700	TraesCS1B02G138100	TraesCS1B02G145800	TraesCS1B02G265900	TraesCS1D02G163800	TraesCS1D02G195300	TraesCS1D02G254500	TraesCS2A02G199300	TraesCS2A02G581600	TraesCS2B02G133000	TraesCS2D02G206900	TraesCS2D02G259300	TraesCS2D02G598500	TraesCS3A02G105400	TraesCS3A02G107200	TraesCS3A02G109300	TraesCS3A02G121300	TraesCS3A02G276500	TraesCS3A02G280800	TraesCS3A02G328000	TraesCS3A02G400400	TraesCS3B02G125600	TraesCS3B02G127400	TraesCS3B02G314600	TraesCS3B02G337700	TraesCS3B02G357500	TraesCS3B02G433400	TraesCS3D02G109300	TraesCS3D02G110200	TraesCS3D02G276600	TraesCS3D02G280600	TraesCS3D02G321500	TraesCS4A02G216900	TraesCS4A02G244500	TraesCS4A02G452600	TraesCS4B02G234800	TraesCS4D02G036000	TraesCS4D02G069300	TraesCS4D02G092000	TraesCS5A02G375000	TraesCS5A02G424800	TraesCS5B02G376900	TraesCS5B02G408300
PL1_24h	response_to_endogenous_stimulus_(GO:0009719)	73	2.33589	1e-11	TraesCS1A02G175500	TraesCS1A02G255100	TraesCS1B02G038700	TraesCS1B02G138100	TraesCS1B02G145800	TraesCS1B02G265900	TraesCS1D02G163800	TraesCS1D02G195300	TraesCS1D02G254500	TraesCS2A02G199300	TraesCS2A02G581600	TraesCS2B02G133000	TraesCS2D02G206900	TraesCS2D02G259300	TraesCS2D02G598500	TraesCS3A02G105400	TraesCS3A02G107200	TraesCS3A02G109300	TraesCS3A02G121300	TraesCS3A02G276500	TraesCS3A02G280800	TraesCS3A02G328000	TraesCS3A02G400400	TraesCS3B02G125600	TraesCS3B02G127400	TraesCS3B02G314600	TraesCS3B02G337700	TraesCS3B02G357500	TraesCS3B02G433400	TraesCS3D02G109300	TraesCS3D02G110200	TraesCS3D02G276600	TraesCS3D02G280600	TraesCS3D02G321500	TraesCS4A02G216900	TraesCS4A02G244500	TraesCS4A02G452600	TraesCS4B02G234800	TraesCS4D02G036000	TraesCS4D02G069300	TraesCS4D02G092000	TraesCS5A02G375000	TraesCS5A02G424800	TraesCS5B02G376900	TraesCS5B02G408300
PL6_3h	response_to_endogenous_stimulus_(GO:0009719)	73	1.49491	0.0429273	TraesCS1A02G175500	TraesCS1A02G255100	TraesCS1B02G038700	TraesCS1B02G138100	TraesCS1B02G145800	TraesCS1B02G265900	TraesCS1D02G163800	TraesCS1D02G195300	TraesCS1D02G254500	TraesCS2A02G199300	TraesCS2A02G581600	TraesCS2B02G133000	TraesCS2D02G206900	TraesCS2D02G259300	TraesCS2D02G598500	TraesCS3A02G105400	TraesCS3A02G107200	TraesCS3A02G109300	TraesCS3A02G121300	TraesCS3A02G276500	TraesCS3A02G280800	TraesCS3A02G328000	TraesCS3A02G400400	TraesCS3B02G125600	TraesCS3B02G127400	TraesCS3B02G314600	TraesCS3B02G337700	TraesCS3B02G357500	TraesCS3B02G433400	TraesCS3D02G109300	TraesCS3D02G110200	TraesCS3D02G276600	TraesCS3D02G280600	TraesCS3D02G321500	TraesCS4A02G216900	TraesCS4A02G244500	TraesCS4A02G452600	TraesCS4B02G234800	TraesCS4D02G036000	TraesCS4D02G069300	TraesCS4D02G092000	TraesCS5A02G375000	TraesCS5A02G424800	TraesCS5B02G376900	TraesCS5B02G408300
PL6_24h	response_to_endogenous_stimulus_(GO:0009719)	73	2.01585	0.00109056	TraesCS1A02G175500	TraesCS1A02G255100	TraesCS1B02G038700	TraesCS1B02G138100	TraesCS1B02G145800	TraesCS1B02G265900	TraesCS1D02G163800	TraesCS1D02G195300	TraesCS1D02G254500	TraesCS2A02G199300	TraesCS2A02G581600	TraesCS2B02G133000	TraesCS2D02G206900	TraesCS2D02G259300	TraesCS2D02G598500	TraesCS3A02G105400	TraesCS3A02G107200	TraesCS3A02G109300	TraesCS3A02G121300	TraesCS3A02G276500	TraesCS3A02G280800	TraesCS3A02G328000	TraesCS3A02G400400	TraesCS3B02G125600	TraesCS3B02G127400	TraesCS3B02G314600	TraesCS3B02G337700	TraesCS3B02G357500	TraesCS3B02G433400	TraesCS3D02G109300	TraesCS3D02G110200	TraesCS3D02G276600	TraesCS3D02G280600	TraesCS3D02G321500	TraesCS4A02G216900	TraesCS4A02G244500	TraesCS4A02G452600	TraesCS4B02G234800	TraesCS4D02G036000	TraesCS4D02G069300	TraesCS4D02G092000	TraesCS5A02G375000	TraesCS5A02G424800	TraesCS5B02G376900	TraesCS5B02G408300
PL1_3h	response_to_hormone_(GO:0009725)	72	2.00781	0.000513	TraesCS1A02G175500	TraesCS1A02G255100	TraesCS1B02G038700	TraesCS1B02G138100	TraesCS1B02G145800	TraesCS1B02G265900	TraesCS1D02G163800	TraesCS1D02G195300	TraesCS1D02G254500	TraesCS2A02G199300	TraesCS2A02G581600	TraesCS2B02G133000	TraesCS2D02G206900	TraesCS2D02G259300	TraesCS2D02G598500	TraesCS3A02G105400	TraesCS3A02G107200	TraesCS3A02G109300	TraesCS3A02G121300	TraesCS3A02G276500	TraesCS3A02G280800	TraesCS3A02G328000	TraesCS3A02G400400	TraesCS3B02G125600	TraesCS3B02G127400	TraesCS3B02G314600	TraesCS3B02G337700	TraesCS3B02G357500	TraesCS3B02G433400	TraesCS3D02G109300	TraesCS3D02G110200	TraesCS3D02G276600	TraesCS3D02G280600	TraesCS3D02G321500	TraesCS4A02G216900	TraesCS4A02G244500	TraesCS4A02G452600	TraesCS4B02G234800	TraesCS4D02G036000	TraesCS4D02G069300	TraesCS4D02G092000	TraesCS5A02G375000	TraesCS5A02G424800	TraesCS5B02G376900	TraesCS5B02G408300
PL1_24h	response_to_hormone_(GO:0009725)	72	2.35667	1e-11	TraesCS1A02G175500	TraesCS1A02G255100	TraesCS1B02G038700	TraesCS1B02G138100	TraesCS1B02G145800	TraesCS1B02G265900	TraesCS1D02G163800	TraesCS1D02G195300	TraesCS1D02G254500	TraesCS2A02G199300	TraesCS2A02G581600	TraesCS2B02G133000	TraesCS2D02G206900	TraesCS2D02G259300	TraesCS2D02G598500	TraesCS3A02G105400	TraesCS3A02G107200	TraesCS3A02G109300	TraesCS3A02G121300	TraesCS3A02G276500	TraesCS3A02G280800	TraesCS3A02G328000	TraesCS3A02G400400	TraesCS3B02G125600	TraesCS3B02G127400	TraesCS3B02G314600	TraesCS3B02G337700	TraesCS3B02G357500	TraesCS3B02G433400	TraesCS3D02G109300	TraesCS3D02G110200	TraesCS3D02G276600	TraesCS3D02G280600	TraesCS3D02G321500	TraesCS4A02G216900	TraesCS4A02G244500	TraesCS4A02G452600	TraesCS4B02G234800	TraesCS4D02G036000	TraesCS4D02G069300	TraesCS4D02G092000	TraesCS5A02G375000	TraesCS5A02G424800	TraesCS5B02G376900	TraesCS5B02G408300
PL6_3h	response_to_hormone_(GO:0009725)	72	1.50739	0.0359954	TraesCS1A02G175500	TraesCS1A02G255100	TraesCS1B02G038700	TraesCS1B02G138100	TraesCS1B02G145800	TraesCS1B02G265900	TraesCS1D02G163800	TraesCS1D02G195300	TraesCS1D02G254500	TraesCS2A02G199300	TraesCS2A02G581600	TraesCS2B02G133000	TraesCS2D02G206900	TraesCS2D02G259300	TraesCS2D02G598500	TraesCS3A02G105400	TraesCS3A02G107200	TraesCS3A02G109300	TraesCS3A02G121300	TraesCS3A02G276500	TraesCS3A02G280800	TraesCS3A02G328000	TraesCS3A02G400400	TraesCS3B02G125600	TraesCS3B02G127400	TraesCS3B02G314600	TraesCS3B02G337700	TraesCS3B02G357500	TraesCS3B02G433400	TraesCS3D02G109300	TraesCS3D02G110200	TraesCS3D02G276600	TraesCS3D02G280600	TraesCS3D02G321500	TraesCS4A02G216900	TraesCS4A02G244500	TraesCS4A02G452600	TraesCS4B02G234800	TraesCS4D02G036000	TraesCS4D02G069300	TraesCS4D02G092000	TraesCS5A02G375000	TraesCS5A02G424800	TraesCS5B02G376900	TraesCS5B02G408300
PL6_24h	response_to_hormone_(GO:0009725)	72	2.01669	0.00130867	TraesCS1A02G175500	TraesCS1A02G255100	TraesCS1B02G038700	TraesCS1B02G138100	TraesCS1B02G145800	TraesCS1B02G265900	TraesCS1D02G163800	TraesCS1D02G195300	TraesCS1D02G254500	TraesCS2A02G199300	TraesCS2A02G581600	TraesCS2B02G133000	TraesCS2D02G206900	TraesCS2D02G259300	TraesCS2D02G598500	TraesCS3A02G105400	TraesCS3A02G107200	TraesCS3A02G109300	TraesCS3A02G121300	TraesCS3A02G276500	TraesCS3A02G280800	TraesCS3A02G328000	TraesCS3A02G400400	TraesCS3B02G125600	TraesCS3B02G127400	TraesCS3B02G314600	TraesCS3B02G337700	TraesCS3B02G357500	TraesCS3B02G433400	TraesCS3D02G109300	TraesCS3D02G110200	TraesCS3D02G276600	TraesCS3D02G280600	TraesCS3D02G321500	TraesCS4A02G216900	TraesCS4A02G244500	TraesCS4A02G452600	TraesCS4B02G234800	TraesCS4D02G036000	TraesCS4D02G069300	TraesCS4D02G092000	TraesCS5A02G375000	TraesCS5A02G424800	TraesCS5B02G376900	TraesCS5B02G408300
PL1_24h	response_to_osmotic_stress_(GO:0006970)	35	2.12519	0.000718	TraesCS1B02G145800	TraesCS1B02G374500	TraesCS2A02G121000	TraesCS2B02G141900	TraesCS2B02G213400	TraesCS3A02G109300	TraesCS3A02G280800	TraesCS3A02G328000	TraesCS3A02G400400	TraesCS3A02G406000	TraesCS3B02G048800	TraesCS3B02G314600	TraesCS3B02G357500	TraesCS3B02G433400	TraesCS3B02G439600	TraesCS3D02G280600	TraesCS3D02G321500	TraesCS3D02G401200	TraesCS3D02G475200	TraesCS4A02G244500	TraesCS4B02G098200	TraesCS4B02G182900	TraesCS4B02G234800	TraesCS4D02G069300	TraesCS4D02G182800	TraesCS5A02G375000	TraesCS5B02G376900	TraesCS5D02G384500	TraesCS6A02G248400	TraesCS6B02G175100	TraesCS6D02G136200	TraesCS7A02G170600	TraesCS7B02G075600	TraesCS7D02G171300	TraesCS7D02G429000
PL6_24h	response_to_osmotic_stress_(GO:0006970)	35	1.55902	0.0377268	TraesCS1B02G145800	TraesCS1B02G374500	TraesCS2A02G121000	TraesCS2B02G141900	TraesCS2B02G213400	TraesCS3A02G109300	TraesCS3A02G280800	TraesCS3A02G328000	TraesCS3A02G400400	TraesCS3A02G406000	TraesCS3B02G048800	TraesCS3B02G314600	TraesCS3B02G357500	TraesCS3B02G433400	TraesCS3B02G439600	TraesCS3D02G280600	TraesCS3D02G321500	TraesCS3D02G401200	TraesCS3D02G475200	TraesCS4A02G244500	TraesCS4B02G098200	TraesCS4B02G182900	TraesCS4B02G234800	TraesCS4D02G069300	TraesCS4D02G182800	TraesCS5A02G375000	TraesCS5B02G376900	TraesCS5D02G384500	TraesCS6A02G248400	TraesCS6B02G175100	TraesCS6D02G136200	TraesCS7A02G170600	TraesCS7B02G075600	TraesCS7D02G171300	TraesCS7D02G429000
PL1_48h	response_to_radiation_(GO:0009314)	38	-1.81975	0.00784063	TraesCS1A02G223300	TraesCS1A02G403300	TraesCS1B02G236600	TraesCS1B02G347600	TraesCS1B02G432700	TraesCS1D02G336900	TraesCS1D02G411300	TraesCS1D02G411600	TraesCS2A02G348900	TraesCS2B02G553600	TraesCS3A02G116300	TraesCS3A02G291900	TraesCS3A02G365600	TraesCS3B02G135400	TraesCS3B02G166100	TraesCS3B02G297200	TraesCS3B02G326500	TraesCS3B02G397400	TraesCS3D02G118200	TraesCS3D02G149600	TraesCS3D02G358700	TraesCS4A02G091300	TraesCS4B02G208500	TraesCS4B02G213400	TraesCS4B02G234800	TraesCS5A02G353800	TraesCS5B02G227900	TraesCS5D02G329200	TraesCS5D02G357600	TraesCS6A02G159800	TraesCS6B02G209600	TraesCS6D02G152700	TraesCS6D02G167800	TraesCS6D02G322300	TraesCS7B02G008400	TraesCS7B02G192500	TraesCS7D02G227300	TraesCSU02G196100
PL6_48h	response_to_radiation_(GO:0009314)	38	-1.81783	0.014453	TraesCS1A02G223300	TraesCS1A02G403300	TraesCS1B02G236600	TraesCS1B02G347600	TraesCS1B02G432700	TraesCS1D02G336900	TraesCS1D02G411300	TraesCS1D02G411600	TraesCS2A02G348900	TraesCS2B02G553600	TraesCS3A02G116300	TraesCS3A02G291900	TraesCS3A02G365600	TraesCS3B02G135400	TraesCS3B02G166100	TraesCS3B02G297200	TraesCS3B02G326500	TraesCS3B02G397400	TraesCS3D02G118200	TraesCS3D02G149600	TraesCS3D02G358700	TraesCS4A02G091300	TraesCS4B02G208500	TraesCS4B02G213400	TraesCS4B02G234800	TraesCS5A02G353800	TraesCS5B02G227900	TraesCS5D02G329200	TraesCS5D02G357600	TraesCS6A02G159800	TraesCS6B02G209600	TraesCS6D02G152700	TraesCS6D02G167800	TraesCS6D02G322300	TraesCS7B02G008400	TraesCS7B02G192500	TraesCS7D02G227300	TraesCSU02G196100
PL6_48h	response_to_stress_(GO:0006950)	216	1.59802	0.0407242	TraesCS1A02G009900	TraesCS1A02G025600	TraesCS1A02G108400	TraesCS1A02G184900	TraesCS1A02G215500	TraesCS1A02G223300	TraesCS1A02G261400	TraesCS1A02G355300	TraesCS1A02G423800	TraesCS1B02G018100	TraesCS1B02G023000	TraesCS1B02G034100	TraesCS1B02G035100	TraesCS1B02G037100	TraesCS1B02G038700	TraesCS1B02G050200	TraesCS1B02G095800	TraesCS1B02G096200	TraesCS1B02G096900	TraesCS1B02G102200	TraesCS1B02G115900	TraesCS1B02G145800	TraesCS1B02G229000	TraesCS1B02G236600	TraesCS1B02G352400	TraesCS1B02G374500	TraesCS1D02G012000	TraesCS1D02G027900	TraesCS1D02G080300	TraesCS1D02G184500	TraesCS1D02G218000	TraesCS1D02G261400	TraesCS1D02G284000	TraesCS1D02G286700	TraesCS1D02G432400	TraesCS2A02G037400	TraesCS2A02G107600	TraesCS2A02G121000	TraesCS2A02G158600	TraesCS2A02G158700	TraesCS2A02G158800	TraesCS2A02G290300	TraesCS2A02G297100	TraesCS2A02G432700	TraesCS2A02G477900
PL1_3h	response_to_water_(GO:0009415)	56	2.29363	1e-11	TraesCS1A02G423800	TraesCS1B02G145800	TraesCS1D02G184500	TraesCS1D02G286700	TraesCS1D02G432400	TraesCS2A02G432700	TraesCS3A02G150800	TraesCS3A02G328000	TraesCS3A02G406000	TraesCS3B02G357500	TraesCS3B02G439600	TraesCS3D02G158600	TraesCS3D02G321500	TraesCS3D02G401200	TraesCS4A02G250900	TraesCS4D02G063100	TraesCS5A02G369800	TraesCS5A02G369900	TraesCS5A02G375000	TraesCS5A02G424700	TraesCS5A02G424800	TraesCS5B02G372100	TraesCS5B02G376900	TraesCS5B02G408300	TraesCS5B02G426700	TraesCS5B02G426800	TraesCS5D02G379200	TraesCS5D02G379300	TraesCS5D02G384500	TraesCS5D02G433200	TraesCS6A02G253300	TraesCS6A02G350100	TraesCS6A02G350300	TraesCS6A02G350500	TraesCS6A02G350600	TraesCS6A02G350700	TraesCS6B02G175100	TraesCS6B02G273400	TraesCS6B02G383200	TraesCS6B02G383500	TraesCS6B02G383600	TraesCS6B02G383800	TraesCS6D02G136200	TraesCS6D02G234700	TraesCS6D02G332500
PL1_24h	response_to_water_(GO:0009415)	56	2.82041	1e-11	TraesCS1A02G423800	TraesCS1B02G145800	TraesCS1D02G184500	TraesCS1D02G286700	TraesCS1D02G432400	TraesCS2A02G432700	TraesCS3A02G150800	TraesCS3A02G328000	TraesCS3A02G406000	TraesCS3B02G357500	TraesCS3B02G439600	TraesCS3D02G158600	TraesCS3D02G321500	TraesCS3D02G401200	TraesCS4A02G250900	TraesCS4D02G063100	TraesCS5A02G369800	TraesCS5A02G369900	TraesCS5A02G375000	TraesCS5A02G424700	TraesCS5A02G424800	TraesCS5B02G372100	TraesCS5B02G376900	TraesCS5B02G408300	TraesCS5B02G426700	TraesCS5B02G426800	TraesCS5D02G379200	TraesCS5D02G379300	TraesCS5D02G384500	TraesCS5D02G433200	TraesCS6A02G253300	TraesCS6A02G350100	TraesCS6A02G350300	TraesCS6A02G350500	TraesCS6A02G350600	TraesCS6A02G350700	TraesCS6B02G175100	TraesCS6B02G273400	TraesCS6B02G383200	TraesCS6B02G383500	TraesCS6B02G383600	TraesCS6B02G383800	TraesCS6D02G136200	TraesCS6D02G234700	TraesCS6D02G332500
PL1_48h	response_to_water_(GO:0009415)	56	2.76362	1e-11	TraesCS1A02G423800	TraesCS1B02G145800	TraesCS1D02G184500	TraesCS1D02G286700	TraesCS1D02G432400	TraesCS2A02G432700	TraesCS3A02G150800	TraesCS3A02G328000	TraesCS3A02G406000	TraesCS3B02G357500	TraesCS3B02G439600	TraesCS3D02G158600	TraesCS3D02G321500	TraesCS3D02G401200	TraesCS4A02G250900	TraesCS4D02G063100	TraesCS5A02G369800	TraesCS5A02G369900	TraesCS5A02G375000	TraesCS5A02G424700	TraesCS5A02G424800	TraesCS5B02G372100	TraesCS5B02G376900	TraesCS5B02G408300	TraesCS5B02G426700	TraesCS5B02G426800	TraesCS5D02G379200	TraesCS5D02G379300	TraesCS5D02G384500	TraesCS5D02G433200	TraesCS6A02G253300	TraesCS6A02G350100	TraesCS6A02G350300	TraesCS6A02G350500	TraesCS6A02G350600	TraesCS6A02G350700	TraesCS6B02G175100	TraesCS6B02G273400	TraesCS6B02G383200	TraesCS6B02G383500	TraesCS6B02G383600	TraesCS6B02G383800	TraesCS6D02G136200	TraesCS6D02G234700	TraesCS6D02G332500
PL6_3h	response_to_water_(GO:0009415)	56	1.84521	0.000119	TraesCS1A02G423800	TraesCS1B02G145800	TraesCS1D02G184500	TraesCS1D02G286700	TraesCS1D02G432400	TraesCS2A02G432700	TraesCS3A02G150800	TraesCS3A02G328000	TraesCS3A02G406000	TraesCS3B02G357500	TraesCS3B02G439600	TraesCS3D02G158600	TraesCS3D02G321500	TraesCS3D02G401200	TraesCS4A02G250900	TraesCS4D02G063100	TraesCS5A02G369800	TraesCS5A02G369900	TraesCS5A02G375000	TraesCS5A02G424700	TraesCS5A02G424800	TraesCS5B02G372100	TraesCS5B02G376900	TraesCS5B02G408300	TraesCS5B02G426700	TraesCS5B02G426800	TraesCS5D02G379200	TraesCS5D02G379300	TraesCS5D02G384500	TraesCS5D02G433200	TraesCS6A02G253300	TraesCS6A02G350100	TraesCS6A02G350300	TraesCS6A02G350500	TraesCS6A02G350600	TraesCS6A02G350700	TraesCS6B02G175100	TraesCS6B02G273400	TraesCS6B02G383200	TraesCS6B02G383500	TraesCS6B02G383600	TraesCS6B02G383800	TraesCS6D02G136200	TraesCS6D02G234700	TraesCS6D02G332500
PL6_24h	response_to_water_(GO:0009415)	56	1.98057	0.00119078	TraesCS1A02G423800	TraesCS1B02G145800	TraesCS1D02G184500	TraesCS1D02G286700	TraesCS1D02G432400	TraesCS2A02G432700	TraesCS3A02G150800	TraesCS3A02G328000	TraesCS3A02G406000	TraesCS3B02G357500	TraesCS3B02G439600	TraesCS3D02G158600	TraesCS3D02G321500	TraesCS3D02G401200	TraesCS4A02G250900	TraesCS4D02G063100	TraesCS5A02G369800	TraesCS5A02G369900	TraesCS5A02G375000	TraesCS5A02G424700	TraesCS5A02G424800	TraesCS5B02G372100	TraesCS5B02G376900	TraesCS5B02G408300	TraesCS5B02G426700	TraesCS5B02G426800	TraesCS5D02G379200	TraesCS5D02G379300	TraesCS5D02G384500	TraesCS5D02G433200	TraesCS6A02G253300	TraesCS6A02G350100	TraesCS6A02G350300	TraesCS6A02G350500	TraesCS6A02G350600	TraesCS6A02G350700	TraesCS6B02G175100	TraesCS6B02G273400	TraesCS6B02G383200	TraesCS6B02G383500	TraesCS6B02G383600	TraesCS6B02G383800	TraesCS6D02G136200	TraesCS6D02G234700	TraesCS6D02G332500
PL1_3h	transcription_regulator_activity_(GO:0140110)	124	1.71962	0.0179602	TraesCS1A02G070400	TraesCS1A02G218100	TraesCS1A02G276800	TraesCS1A02G409800	TraesCS1A02G411100	TraesCS1A02G426700	TraesCS1B02G088900	TraesCS1B02G439800	TraesCS1B02G441300	TraesCS1B02G461600	TraesCS1D02G072900	TraesCS1D02G417100	TraesCS1D02G418900	TraesCS1D02G436500	TraesCS2A02G099900	TraesCS2A02G323000	TraesCS2A02G389400	TraesCS2A02G427700	TraesCS2B02G232000	TraesCS2B02G289900	TraesCS2B02G359600	TraesCS2B02G407600	TraesCS2B02G419600	TraesCS2B02G448100	TraesCS2B02G517400	TraesCS2B02G543800	TraesCS2D02G146100	TraesCS2D02G339900	TraesCS2D02G369900	TraesCS2D02G387300	TraesCS2D02G414600	TraesCS2D02G425700	TraesCS2D02G515900	TraesCS2D02G543900	TraesCS3A02G041200	TraesCS3A02G167200	TraesCS3A02G280800	TraesCS3A02G328000	TraesCS3A02G400400	TraesCS3A02G436100	TraesCS3A02G489500	TraesCS3A02G489600	TraesCS3A02G489700	TraesCS3A02G526600	TraesCS3B02G003200
PL1_24h	transcription_regulator_activity_(GO:0140110)	124	2.43235	1e-11	TraesCS1A02G070400	TraesCS1A02G218100	TraesCS1A02G276800	TraesCS1A02G409800	TraesCS1A02G411100	TraesCS1A02G426700	TraesCS1B02G088900	TraesCS1B02G439800	TraesCS1B02G441300	TraesCS1B02G461600	TraesCS1D02G072900	TraesCS1D02G417100	TraesCS1D02G418900	TraesCS1D02G436500	TraesCS2A02G099900	TraesCS2A02G323000	TraesCS2A02G389400	TraesCS2A02G427700	TraesCS2B02G232000	TraesCS2B02G289900	TraesCS2B02G359600	TraesCS2B02G407600	TraesCS2B02G419600	TraesCS2B02G448100	TraesCS2B02G517400	TraesCS2B02G543800	TraesCS2D02G146100	TraesCS2D02G339900	TraesCS2D02G369900	TraesCS2D02G387300	TraesCS2D02G414600	TraesCS2D02G425700	TraesCS2D02G515900	TraesCS2D02G543900	TraesCS3A02G041200	TraesCS3A02G167200	TraesCS3A02G280800	TraesCS3A02G328000	TraesCS3A02G400400	TraesCS3A02G436100	TraesCS3A02G489500	TraesCS3A02G489600	TraesCS3A02G489700	TraesCS3A02G526600	TraesCS3B02G003200
PL6_24h	transcription_regulator_activity_(GO:0140110)	124	1.98553	0.000982	TraesCS1A02G070400	TraesCS1A02G218100	TraesCS1A02G276800	TraesCS1A02G409800	TraesCS1A02G411100	TraesCS1A02G426700	TraesCS1B02G088900	TraesCS1B02G439800	TraesCS1B02G441300	TraesCS1B02G461600	TraesCS1D02G072900	TraesCS1D02G417100	TraesCS1D02G418900	TraesCS1D02G436500	TraesCS2A02G099900	TraesCS2A02G323000	TraesCS2A02G389400	TraesCS2A02G427700	TraesCS2B02G232000	TraesCS2B02G289900	TraesCS2B02G359600	TraesCS2B02G407600	TraesCS2B02G419600	TraesCS2B02G448100	TraesCS2B02G517400	TraesCS2B02G543800	TraesCS2D02G146100	TraesCS2D02G339900	TraesCS2D02G369900	TraesCS2D02G387300	TraesCS2D02G414600	TraesCS2D02G425700	TraesCS2D02G515900	TraesCS2D02G543900	TraesCS3A02G041200	TraesCS3A02G167200	TraesCS3A02G280800	TraesCS3A02G328000	TraesCS3A02G400400	TraesCS3A02G436100	TraesCS3A02G489500	TraesCS3A02G489600	TraesCS3A02G489700	TraesCS3A02G526600	TraesCS3B02G003200
[truncated: 171 more columns]
