# Supplementary material for: Identification and transcriptomic profiling of salinity stress response genes in colored wheat mutant
Source: PeerJ. 2024 Mar 6;12:e17043. doi: 10.7717/peerj.17043 (PMC10924784; doi:10.7717/peerj.17043)
Supplement: Supplemental Information 9 [file peerj-12-17043-s009.xlsx]

## Sheet: Supplemenatry Table 6
Supplementary Table 6. Gene set enrichment analysis (GSEA) for PL1 and PL6 using Kyoto ncyclopedia of Genes and Genomes (KEGG) pathways mapping of differentially expressed genes.
Group	KEGG_Pathway	Gene_number	Rich_factor	adjusted_pvalue	Gene ID
PL1_24h	Alanine,_aspartate_and_glutamate_metabolism	10	0.188679	0.00791305	TraesCS5A02G153900	TraesCS5B02G152600	TraesCS4A02G262600	TraesCS2B02G538800	TraesCS5D02G159100	TraesCS2B02G538600	TraesCS2A02G510800	TraesCS2A02G510700	TraesCS2B02G538700	TraesCS3A02G077100
PL1_24h	alpha-Linolenic_acid_metabolism	10	0.222222	0.00313903	TraesCS7D02G175900	TraesCS7D02G244800	TraesCS2D02G313400	TraesCS2B02G333600	TraesCS7A02G537100	TraesCS7A02G246200	TraesCS7A02G174700	TraesCS2A02G315100	TraesCS6D02G154600	TraesCS5D02G041100
PL1_24h	Arginine_and_proline_metabolism	14	0.291667	3.63e-05	TraesCS3A02G250700	TraesCS3A02G363700	TraesCS6A02G219500	TraesCS7D02G063900	TraesCS7B02G232700	TraesCS5A02G375000	TraesCS2A02G467300	TraesCS2D02G467300	TraesCS5B02G210100	TraesCS7A02G378800	TraesCS3B02G395900	TraesCS2B02G490100	TraesCS3D02G357200	TraesCS5D02G218400
PL1_24h	beta-Alanine_metabolism	9	0.225	0.00509251	TraesCS3A02G250700	TraesCS4A02G262600	TraesCS7B02G232700	TraesCS2D02G467300	TraesCS5B02G210100	TraesCS7A02G378800	TraesCS2A02G467300	TraesCS2B02G490100	TraesCS5D02G218400
PL1_24h	Biosynthesis_of_secondary_metabolites	126	0.109661	1.1e-11	TraesCS3D02G315700	TraesCS6B02G056900	TraesCS2B02G538800	TraesCS5A02G356300	TraesCS5D02G217400	TraesCS5A02G234300	TraesCS2B02G445500	TraesCS4B02G071500	TraesCS5D02G302700	TraesCS5D02G038800	TraesCS5B02G232700	TraesCS5D02G365100	TraesCS2B02G398400	TraesCS1A02G235100	TraesCS5D02G218400	TraesCS3B02G483500	TraesCS1D02G080300	TraesCS1A02G089600	TraesCS7D02G071200	TraesCS2B02G189700	TraesCS2D02G377600	TraesCS6A02G325400	TraesCS3D02G103900	TraesCS1B02G248300	TraesCS5D02G302600	TraesCS4A02G201200	TraesCS5D02G159100	TraesCS6B02G166200	TraesCS7A02G537100	TraesCS5B02G210100	TraesCS5A02G295100	TraesCS6B02G438800	TraesCS6D02G054900	TraesCS2D02G313400	TraesCS7A02G189500	TraesCS2B02G333600	TraesCS2B02G445600	TraesCS2A02G510700	TraesCS6A02G067700	TraesCS3B02G256800	TraesCS2A02G510800	TraesCS7D02G199900	TraesCS5D02G241100	TraesCS7D02G175900	TraesCS4B02G097200
PL1_24h	Carotenoid_biosynthesis	9	0.321429	0.000929654	TraesCS5B02G029300	TraesCS5D02G038800	TraesCS5A02G374000	TraesCS5B02G358800	TraesCS5A02G356300	TraesCS5D02G365100	TraesCS5D02G383500	TraesCS5B02G375900	TraesCS6B02G438800
PL1_24h	Cyanoamino_acid_metabolism	13	0.25	0.000314807	TraesCS3A02G447500	TraesCS3B02G483500	TraesCS5B02G294600	TraesCS5A02G295200	TraesCS5D02G302700	TraesCS2D02G594400	TraesCS2B02G538800	TraesCS2B02G538600	TraesCS2A02G510800	TraesCS2A02G510700	TraesCS2B02G538700	TraesCS5D02G302600	TraesCS5A02G295100
PL1_24h	Cysteine_and_methionine_metabolism	13	0.127451	0.0258935	TraesCS5D02G241100	TraesCS6A02G219500	TraesCS6A02G325600	TraesCS7B02G232700	TraesCS1A02G089600	TraesCS1A02G089500	TraesCS1D02G184500	TraesCS5B02G232700	TraesCS2D02G394200	TraesCS6A02G325400	TraesCS1A02G181000	TraesCS5A02G234300	TraesCS1D02G098100
PL1_24h	Diterpenoid_biosynthesis	10	0.37037	0.00019122	TraesCS1A02G334400	TraesCS2D02G029500	TraesCS1B02G347600	TraesCS2B02G445300	TraesCS3B02G166100	TraesCS1D02G336900	TraesCS2B02G445600	TraesCS2B02G445200	TraesCS2B02G445500	TraesCS3D02G149600
PL1_24h	Galactose_metabolism	18	0.327273	5.06e-07	TraesCS4D02G350500	TraesCS4B02G356800	TraesCS2D02G095800	TraesCS2D02G382600	TraesCS5A02G314800	TraesCS3A02G092800	TraesCS2B02G112800	TraesCS3A02G113900	TraesCS3B02G108000	TraesCS2B02G403000	TraesCS1B02G478400	TraesCS2B02G350500	TraesCS1A02G443900	TraesCS2B02G109800	TraesCS3D02G092900	TraesCS2A02G097400	TraesCS1D02G451900	TraesCS2D02G331200
PL1_24h	Linoleic_acid_metabolism	9	0.642857	1.96e-05	TraesCS7D02G244800	TraesCS5D02G388800	TraesCS2D02G313400	TraesCS2B02G333600	TraesCS7A02G246200	TraesCS4D02G035200	TraesCS2A02G315100	TraesCS6D02G154600	TraesCS5D02G041100
PL1_24h	MAPK_signaling_pathway_-_plant	51	0.351724	1.12e-20	TraesCS2D02G000300	TraesCS1A02G358600	TraesCS4D02G210900	TraesCS3D02G256500	TraesCS7A02G198900	TraesCS3B02G277900	TraesCS2A02G000400	TraesCS1D02G363500	TraesCS4D02G191200	TraesCS2D02G394200	TraesCS7D02G414700	TraesCS1B02G375100	TraesCS4A02G094300	TraesCS7B02G309900	TraesCS3D02G249000	TraesCS3D02G212100	TraesCS4B02G210100	TraesCS2B02G023600	TraesCS1A02G215900	TraesCS7B02G105300	TraesCS7A02G422500	TraesCS3A02G237800	TraesCS1D02G218200	TraesCS2B02G521800	TraesCS1B02G229400	TraesCS3A02G249000	TraesCS1D02G207000	TraesCS3D02G355900	TraesCS3B02G394600	TraesCS7A02G410700	TraesCS5A02G183300	TraesCS7B02G322900	TraesCS3B02G240000	TraesCS4B02G189800	TraesCS5A02G183600	TraesCS5D02G408200	TraesCS7D02G201300	TraesCS3A02G209200	TraesCS1D02G072900	TraesCS3D02G238000	TraesCS2D02G493700	TraesCS2A02G493800	TraesCS7D02G201400	TraesCS1D02G195300	TraesCS5B02G182000
PL1_24h	Phenylpropanoid_biosynthesis	27	0.121622	0.00156117	TraesCS6D02G054900	TraesCS2A02G380900	TraesCS6D02G127100	TraesCS5D02G302700	TraesCS5D02G302600	TraesCS4A02G036200	TraesCS1D02G080300	TraesCS6B02G063900	TraesCS5A02G295100	TraesCS3A02G447500	TraesCS3B02G483500	TraesCS3A02G342900	TraesCS2D02G594400	TraesCS2D02G377600	TraesCS2A02G381100	TraesCS6A02G138000	TraesCS7B02G251100	TraesCS3B02G375100	TraesCS2A02G381000	TraesCS5B02G294600	TraesCS5A02G295200	TraesCS2B02G398400	TraesCS2B02G398200	TraesCS2D02G108500	TraesCS6B02G166200	TraesCS3D02G325300	TraesCS3D02G336900
PL1_24h	Plant_hormone_signal_transduction	68	0.295652	6.24e-24	TraesCS2D02G000300	TraesCS3A02G276500	TraesCS5B02G211000	TraesCS1A02G358600	TraesCS1B02G265900	TraesCS4D02G325200	TraesCS2D02G552200	TraesCS7A02G198900	TraesCS3B02G277900	TraesCS2D02G493700	TraesCS1D02G363500	TraesCS4D02G191200	TraesCS3A02G105400	TraesCS7D02G201400	TraesCS1B02G375100	TraesCS4A02G094300	TraesCS3D02G249000	TraesCS5A02G131600	TraesCS5A02G212800	TraesCS4B02G210100	TraesCS7D02G171300	TraesCS3B02G337700	TraesCS1A02G215900	TraesCS7B02G105300	TraesCS6D02G312800	TraesCS3A02G237800	TraesCS1D02G218200	TraesCS5A02G183600	TraesCS5D02G219300	TraesCS2D02G308000	TraesCS1B02G229400	TraesCS3A02G249000	TraesCS7A02G170600	TraesCS3B02G394600	TraesCS7D02G201300	TraesCS3D02G355900	TraesCS3A02G362200	TraesCS4A02G007900	TraesCS7D02G419900	TraesCS3D02G212100	TraesCS1A02G255100	TraesCS2A02G551100	TraesCS1D02G254500	TraesCS2B02G521800	TraesCS3D02G276600
PL1_24h	Starch_and_sucrose_metabolism	34	0.22973	1.33e-09	TraesCS4B02G356800	TraesCS3B02G483500	TraesCS1A02G183000	TraesCS1A02G210400	TraesCS5B02G193100	TraesCS1D02G213700	TraesCS5A02G203500	TraesCS5D02G302700	TraesCS2D02G382600	TraesCS2B02G194200	TraesCS2B02G403000	TraesCS5A02G295100	TraesCS3A02G447500	TraesCS4D02G350500	TraesCS5D02G210000	TraesCS4A02G140000	TraesCS1D02G218000	TraesCS7B02G111700	TraesCS2D02G594400	TraesCS4B02G344300	TraesCS1B02G224300	TraesCS5D02G302600	TraesCS4D02G339400	TraesCS4D02G169800	TraesCS2B02G274900	TraesCS1A02G215500	TraesCS5B02G294600	TraesCS5A02G295200	TraesCS7A02G204500	TraesCS4D02G251000	TraesCS6A02G248400	TraesCS1B02G229000	TraesCS5A02G513200	TraesCS7D02G207600
PL1_24h	Zeatin_biosynthesis	6	0.181818	0.0475275	TraesCS7A02G189500	TraesCS3D02G310200	TraesCS3D02G475800	TraesCS7B02G094400	TraesCS7D02G190600	TraesCS2A02G378300
PL1_3h	Alanine,_aspartate_and_glutamate_metabolism	9	0.169811	0.00112142	TraesCS5A02G153900	TraesCS5B02G152600	TraesCS5D02G159100	TraesCS7B02G253600	TraesCS1B02G102700	TraesCS3A02G515300	TraesCS4B02G240900	TraesCS2B02G538700	TraesCS3A02G077100
PL1_3h	Arginine_and_proline_metabolism	14	0.291667	9.93e-08	TraesCS3A02G363700	TraesCS3D02G357200	TraesCS1B02G223300	TraesCS7A02G350100	TraesCS1A02G209100	TraesCS5A02G375000	TraesCS2A02G467300	TraesCSU02G233300	TraesCS5B02G210100	TraesCS7A02G378800	TraesCS3B02G395900	TraesCS1D02G280700	TraesCS1D02G212400	TraesCS5D02G218400
PL1_3h	beta-Alanine_metabolism	6	0.15	0.0220389	TraesCS7A02G350100	TraesCS7A02G378800	TraesCS5B02G210100	TraesCS3A02G515300	TraesCS2A02G467300	TraesCS5D02G218400
PL1_3h	Biosynthesis_of_amino_acids	21	0.0945946	0.000147686	TraesCS4D02G236800	TraesCS5A02G153900	TraesCS3D02G357200	TraesCS5B02G152600	TraesCS3A02G363700	TraesCS2B02G350500	TraesCS6D02G230100	TraesCS1B02G113300	TraesCS5D02G159100	TraesCS2A02G577600	TraesCS6B02G084400	TraesCS1B02G102700	TraesCS4B02G235400	TraesCS4D02G264500	TraesCS3B02G395900	TraesCS1D02G280700	TraesCS4B02G240900	TraesCS3A02G077100	TraesCS2D02G073900	TraesCS2D02G331200	TraesCS5B02G018700
PL1_3h	Biosynthesis_of_secondary_metabolites	81	0.0704961	1.39e-10	TraesCS2A02G039400	TraesCS6B02G298800	TraesCS5B02G358800	TraesCS3D02G357200	TraesCS5B02G018700	TraesCS3A02G136300	TraesCS1A02G209100	TraesCS7D02G166300	TraesCS5D02G487900	TraesCS1A02G040900	TraesCS5D02G159100	TraesCS3B02G395900	TraesCS6A02G344000	TraesCS1B02G099800	TraesCS1B02G096200	TraesCS1B02G113300	TraesCS5D02G241000	TraesCS2D02G073900	TraesCS7B02G484200	TraesCS5A02G234300	TraesCS3A02G363700	TraesCS2B02G538700	TraesCS4B02G071500	TraesCS1D02G212400	TraesCS1B02G223300	TraesCS2A02G036300	TraesCS7A02G238900	TraesCS1B02G119300	TraesCS6D02G230100	TraesCS5A02G375000	TraesCS6B02G084400	TraesCS2B02G350500	TraesCSU02G036600	TraesCS2D02G154300	TraesCS4D02G210700	TraesCS4D02G264500	TraesCS1D02G280700	TraesCS5D02G365100	TraesCS5B02G232700	TraesCS1A02G235100	TraesCS5D02G218400	TraesCS1B02G096900	TraesCS4D02G236800	TraesCS5D02G241100	TraesCS5A02G222700
PL1_3h	Carotenoid_biosynthesis	10	0.357143	3.04e-06	TraesCS6B02G298800	TraesCS5B02G375900	TraesCS5D02G038800	TraesCS5A02G374000	TraesCS5B02G358800	TraesCS5A02G356300	TraesCS5D02G383500	TraesCS6A02G392000	TraesCS5D02G365100	TraesCS7B02G482000
PL1_3h	Cysteine_and_methionine_metabolism	17	0.166667	2.13e-06	TraesCS4B02G235400	TraesCS5D02G241100	TraesCS5A02G234200	TraesCS1B02G116700	TraesCS5A02G234300	TraesCS6D02G230100	TraesCS4D02G236800	TraesCS1B02G117400	TraesCS1D02G184500	TraesCS5B02G232700	TraesCS1B02G117500	TraesCS7A02G350100	TraesCS5D02G241000	TraesCS4A02G027800	TraesCS1A02G181000	TraesCS1B02G199600	TraesCS5B02G018700
PL1_3h	Lysine_degradation	6	0.136364	0.0313936	TraesCS2A02G036300	TraesCS5B02G210100	TraesCS6B02G376200	TraesCS6A02G344000	TraesCS6D02G325100	TraesCS5D02G218400
PL1_3h	MAPK_signaling_pathway	39	0.268966	1.9e-20	TraesCS2D02G000300	TraesCS3A02G237800	TraesCS4D02G210900	TraesCS2B02G105300	TraesCS1B02G127000	TraesCS3B02G277900	TraesCS2A02G000400	TraesCS1D02G363500	TraesCS4D02G191200	TraesCS1B02G375100	TraesCS4A02G094300	TraesCS3D02G249000	TraesCS5B02G181500	TraesCS3D02G212100	TraesCS4B02G210100	TraesCS1A02G215900	TraesCS1A02G358600	TraesCS1D02G218200	TraesCS7B02G493700	TraesCS6B02G366900	TraesCS6B02G192400	TraesCS3A02G249000	TraesCS3A02G260200	TraesCS3D02G355900	TraesCS3B02G394600	TraesCS5A02G183300	TraesCS3D02G260500	TraesCS3D02G256500	TraesCS3B02G240000	TraesCS5A02G183600	TraesCS7D02G161200	TraesCS3D02G238000	TraesCS1B02G229400	TraesCS5B02G182000	TraesCS3A02G362200	TraesCS7B02G322900	TraesCS3A02G209200	TraesCS5D02G188600	TraesCS2D02G571600
PL1_3h	Plant_hormone_signal_transduction	38	0.165217	2.99e-14	TraesCS2D02G000300	TraesCS3A02G237800	TraesCS4D02G210900	TraesCS2B02G105300	TraesCS1B02G127000	TraesCS3B02G277900	TraesCS2A02G000400	TraesCS1D02G363500	TraesCS4D02G191200	TraesCS1B02G375100	TraesCS4A02G094300	TraesCS3D02G249000	TraesCS5B02G181500	TraesCS3D02G212100	TraesCS4B02G210100	TraesCS1A02G215900	TraesCS1B02G138100	TraesCS6D02G312800	TraesCS1A02G358600	TraesCS5A02G064600	TraesCS1D02G218200	TraesCS5A02G049600	TraesCS1B02G229400	TraesCS3A02G249000	TraesCS7A02G170600	TraesCS3D02G355900	TraesCS3B02G394600	TraesCS5A02G183300	TraesCS3B02G240000	TraesCS5A02G183600	TraesCS6B02G364000	TraesCS7D02G161200	TraesCS3D02G238000	TraesCS6A02G333600	TraesCS5B02G182000	TraesCS3A02G362200	TraesCS3A02G209200	TraesCS5D02G188600
PL1_3h	Pyruvate_metabolism	8	0.103896	0.0313936	TraesCS2A02G036300	TraesCS7A02G238900	TraesCS5B02G210100	TraesCS1B02G150200	TraesCS3B02G320200	TraesCS1B02G141700	TraesCS5D02G218400	TraesCS7D02G199900
PL1_3h	Starch_and_sucrose_metabolism	21	0.141892	8.29e-07	TraesCS2A02G224900	TraesCS5B02G202200	TraesCS5D02G210000	TraesCS4A02G140000	TraesCS2D02G382600	TraesCS1B02G119300	TraesCS7A02G204500	TraesCS2D02G594400	TraesCS4B02G344300	TraesCSU02G036600	TraesCS5A02G203500	TraesCS2B02G194200	TraesCS7D02G207600	TraesCS6B02G384500	TraesCSU02G242100	TraesCS4D02G251000	TraesCS5A02G513200	TraesCS2A02G039400	TraesCS4D02G339400	TraesCS4D02G169800	TraesCS4B02G167500
PL1_3h	Valine,_leucine_and_isoleucine_degradation	8	0.181818	0.00179781	TraesCS4B02G235400	TraesCS1D02G067800	TraesCS2A02G036300	TraesCS6B02G050600	TraesCS5B02G210100	TraesCS4D02G236800	TraesCS4B02G071500	TraesCS5D02G218400
PL1_48h	Alanine,_aspartate_and_glutamate_metabolism	10	0.188679	0.000842292	TraesCS5A02G153900	TraesCS5B02G152600	TraesCS1B02G102700	TraesCS3D02G376600	TraesCS3B02G415900	TraesCS5D02G159100	TraesCS3A02G383500	TraesCS2B02G538600	TraesCS7B02G253600	TraesCS3A02G077100
PL1_48h	alpha-Linolenic_acid_metabolism	8	0.177778	0.00516523	TraesCS7B02G455300	TraesCS6D02G010100	TraesCS7D02G524400	TraesCS3D02G298200	TraesCS4A02G061800	TraesCS7A02G141800	TraesCS7B02G044200	TraesCS5D02G041100
PL1_48h	Arginine_and_proline_metabolism	10	0.208333	0.000478366	TraesCS3D02G357200	TraesCS5B02G376900	TraesCS5A02G375000	TraesCS1B02G018200	TraesCS5D02G384500	TraesCS7D02G375700	TraesCS7A02G378800	TraesCS3B02G395900	TraesCS7D02G265900	TraesCS5D02G218400
PL1_48h	beta-Alanine_metabolism	7	0.175	0.00968138	TraesCS2D02G335300	TraesCS7D02G375700	TraesCS7A02G378800	TraesCS7A02G141800	TraesCS7B02G044200	TraesCS7D02G265900	TraesCS5D02G218400
PL1_48h	Biosynthesis_of_secondary_metabolites	124	0.10792	2e-23	TraesCS7A02G075600	TraesCS1A02G223300	TraesCS2D02G335300	TraesCS2A02G067000	TraesCS7A02G319100	TraesCS2B02G124800	TraesCS7A02G418900	TraesCS6D02G219700	TraesCS2B02G593000	TraesCS4D02G220500	TraesCS5D02G038800	TraesCS5B02G232700	TraesCS7D02G539200	TraesCS3B02G483500	TraesCS5A02G222700	TraesCS2D02G468900	TraesCS3D02G298200	TraesCS7D02G417400	TraesCS7A02G141800	TraesCS6A02G325400	TraesCS6D02G065100	TraesCS1B02G115900	TraesCS4B02G278800	TraesCS1B02G117400	TraesCS1B02G075200	TraesCS3A02G226600	TraesCS2A02G022800	TraesCS6D02G054900	TraesCS4A02G025300	TraesCS1B02G257700	TraesCS6A02G266700	TraesCS2A02G590600	TraesCS1B02G023600	TraesCS7B02G044200	TraesCS6B02G265600	TraesCS5B02G221700	TraesCS5A02G029700	TraesCS6A02G248000	TraesCS2B02G224000	TraesCS7D02G199900	TraesCS5D02G241100	TraesCS6D02G010100	TraesCS2D02G583000	TraesCS3D02G376600	TraesCS1B02G236600
PL1_48h	Carbon_fixation_in_photosynthetic_organisms	19	0.283582	4.69e-09	TraesCS2B02G079400	TraesCS7A02G345400	TraesCS4D02G220500	TraesCS1B02G102700	TraesCS1B02G141700	TraesCS1D02G274000	TraesCS2A02G067100	TraesCS3A02G275600	TraesCS2A02G067000	TraesCS3B02G320200	TraesCS2D02G065400	TraesCS2A02G066900	TraesCS2D02G065300	TraesCS3A02G134200	TraesCS2A02G075200	TraesCS3D02G150500	TraesCS2D02G073900	TraesCS2A02G067200	TraesCS7D02G333900
PL1_48h	Carbon_metabolism	31	0.128099	3.41e-07	TraesCS2B02G079400	TraesCS7A02G075600	TraesCS2A02G067100	TraesCS2A02G067000	TraesCS3A02G134200	TraesCS2A02G075200	TraesCS2D02G073900	TraesCS7B02G044200	TraesCS2A02G067200	TraesCS7D02G333900	TraesCS4A02G401700	TraesCS4D02G220500	TraesCS2D02G065400	TraesCS2A02G066900	TraesCS3B02G320200	TraesCS1B02G234300	TraesCS1D02G274000	TraesCS7D02G199900	TraesCS7A02G345400	TraesCS7D02G071200	TraesCS3A02G275600	TraesCS7A02G141800	TraesCS1B02G053600	TraesCS3D02G150500	TraesCS1B02G141700	TraesCS7A02G102800	TraesCS3D02G250600	TraesCS1B02G102700	TraesCS4D02G186800	TraesCS7D02G096800	TraesCS2D02G065300
PL1_48h	Carotenoid_biosynthesis	6	0.214286	0.00947817	TraesCS2A02G317000	TraesCS7A02G418900	TraesCS2B02G335400	TraesCS5D02G038800	TraesCS2A02G238400	TraesCS2D02G314900
PL1_48h	Cyanoamino_acid_metabolism	8	0.153846	0.00964919	TraesCS3A02G447500	TraesCS3B02G483500	TraesCS2A02G022800	TraesCS5B02G394200	TraesCS3D02G440200	TraesCS2B02G538600	TraesCS3B02G484200	TraesCS6B02G261000
PL1_48h	Cysteine_and_methionine_metabolism	15	0.147059	0.000249439	TraesCS5D02G241100	TraesCS4A02G401700	TraesCS6A02G325600	TraesCS1B02G116700	TraesCS4A02G027800	TraesCS1B02G117400	TraesCS7D02G265900	TraesCS1B02G060900	TraesCS5B02G232700	TraesCS1B02G117500	TraesCS6A02G248000	TraesCS7D02G096800	TraesCS1B02G234300	TraesCS7A02G102800	TraesCS6A02G325400
PL1_48h	Glutathione_metabolism	15	0.140187	0.000393752	TraesCS3D02G483000	TraesCS4B02G059300	TraesCS2D02G598000	TraesCS1B02G097400	TraesCS4A02G455000	TraesCS2D02G044100	TraesCS2B02G604800	TraesCS1B02G127900	TraesCS7D02G030800	TraesCS1B02G097200	TraesCS1B02G113700	TraesCS1B02G059100	TraesCS4B02G059100	TraesCS7D02G265900	TraesCS1D02G190000
PL1_48h	Glyoxylate_and_dicarboxylate_metabolism	9	0.142857	0.00824935	TraesCS2B02G079400	TraesCS2D02G065300	TraesCS2A02G067000	TraesCS2D02G065400	TraesCS2A02G066900	TraesCS4D02G186800	TraesCS2A02G067100	TraesCS2A02G067200	TraesCS3D02G250600
PL1_48h	Linoleic_acid_metabolism	9	0.642857	1.49e-06	TraesCS6D02G121900	TraesCS5D02G388800	TraesCS6D02G010100	TraesCS6A02G132500	TraesCS3D02G298200	TraesCS6D02G122000	TraesCS6A02G132200	TraesCS6B02G160400	TraesCS5D02G041100
PL1_48h	MAPK_signaling_pathway_-_plant	14	0.0965517	0.0111933	TraesCS7D02G201300	TraesCS4B02G210100	TraesCS5D02G081700	TraesCS1B02G145800	TraesCS5B02G075800	TraesCS7B02G105300	TraesCS7A02G198900	TraesCS2A02G166200	TraesCS6B02G366900	TraesCS7D02G201400	TraesCS1B02G088900	TraesCS4A02G094300	TraesCS1B02G127000	TraesCS6B02G192400
PL1_48h	Peroxisome	9	0.1125	0.0273094	TraesCS2A02G581000	TraesCS2D02G590200	TraesCS1B02G000800	TraesCS1B02G125400	TraesCS3A02G438000	TraesCS7A02G141800	TraesCS1B02G093600	TraesCS7B02G044200	TraesCS2B02G608900
PL1_48h	Phenylpropanoid_biosynthesis	22	0.0990991	0.000744529	TraesCS6D02G054900	TraesCS6B02G063800	TraesCS7A02G319100	TraesCS7A02G339600	TraesCS6A02G266700	TraesCS2B02G124800	TraesCS3B02G484200	TraesCS1A02G108400	TraesCS2B02G224000	TraesCS6B02G063900	TraesCS3A02G447500	TraesCS3B02G483500	TraesCS5A02G222700	TraesCS2D02G583000	TraesCS5B02G394200	TraesCS3D02G440200	TraesCS1B02G095800	TraesCS2D02G377500	TraesCS7D02G417400	TraesCS7B02G251100	TraesCS1B02G115900	TraesCS5B02G221700
PL1_48h	Pyruvate_metabolism	12	0.155844	0.000842292	TraesCS7A02G345400	TraesCS4D02G220500	TraesCS3A02G275600	TraesCS3B02G320200	TraesCS4D02G186800	TraesCS3A02G134200	TraesCS1B02G150200	TraesCS3D02G150500	TraesCS1B02G141700	TraesCS7D02G333900	TraesCS5D02G218400	TraesCS7D02G199900
PL1_48h	Starch_and_sucrose_metabolism	21	0.141892	1.22e-05	TraesCS3A02G447500	TraesCS5B02G202200	TraesCS5D02G210000	TraesCS2B02G491700	TraesCS2D02G382600	TraesCS2D02G468900	TraesCS1A02G215500	TraesCS5B02G394200	TraesCS7B02G018600	TraesCS3D02G440200	TraesCS4D02G251000	TraesCS1B02G053600	TraesCS3B02G484200	TraesCS2B02G194200	TraesCS1B02G257700	TraesCS3B02G483500	TraesCS1B02G119300	TraesCS1B02G229000	TraesCS5A02G513200	TraesCS2B02G240200	TraesCS2B02G390700
PL1_48h	Sulfur_metabolism	7	0.225806	0.00368266	TraesCS4A02G401700	TraesCS2A02G032500	TraesCS2D02G231100	TraesCS6D02G216000	TraesCS6B02G260100	TraesCS7D02G096800	TraesCS7A02G102800
PL6_24h	Alanine,_aspartate_and_glutamate_metabolism	11	0.207547	0.000498155	TraesCS2D02G512100	TraesCS5A02G153900	TraesCS5B02G152600	TraesCS2D02G511800	TraesCS2B02G538800	TraesCS2A02G510400	TraesCS5D02G159100	TraesCS2B02G538600	TraesCS2A02G510800	TraesCS2B02G538700	TraesCS3A02G077100
PL6_24h	Arginine_and_proline_metabolism	14	0.291667	3.04e-06	TraesCS3A02G250700	TraesCS3A02G363700	TraesCS3D02G357200	TraesCS2A02G467300	TraesCS5A02G375000	TraesCS5A02G213600	TraesCS5B02G210100	TraesCS2D02G467300	TraesCS6D02G202500	TraesCS3B02G395900	TraesCS2B02G490100	TraesCS6A02G219500	TraesCS5D02G127300	TraesCS5D02G218400
PL6_24h	beta-Alanine_metabolism	8	0.2	0.00432301	TraesCS3A02G250700	TraesCS2A02G467300	TraesCS2D02G467300	TraesCS5B02G210100	TraesCS5A02G213600	TraesCS2B02G490100	TraesCS5D02G127300	TraesCS5D02G218400
PL6_24h	Biosynthesis_of_secondary_metabolites	109	0.0948651	2.78e-12	TraesCS5A02G375000	TraesCS1A02G223300	TraesCS2B02G538800	TraesCS2A02G067000	TraesCS7A02G319100	TraesCS5A02G356300	TraesCS7A02G418900	TraesCS4B02G071500	TraesCS5D02G038800	TraesCS2A02G331700	TraesCS5D02G365100	TraesCS5D02G218400	TraesCS3B02G483500	TraesCS5A02G222700	TraesCS1A02G089600	TraesCS5A02G213600	TraesCS2D02G377600	TraesCS6A02G325400	TraesCS3D02G103900	TraesCS3D02G224600	TraesCS5D02G159100	TraesCS2D02G512100	TraesCS7A02G537100	TraesCS5B02G210100	TraesCS2B02G615800	TraesCS7D02G190600	TraesCS3A02G226600	TraesCS4A02G025300	TraesCS5D02G210600	TraesCS2B02G126200	TraesCS5A02G247200	TraesCS3B02G256800	TraesCS7D02G370400	TraesCS2A02G510800	TraesCS5D02G127300	TraesCS2D02G423400	TraesCS7D02G199900	TraesCS5D02G241100	TraesCS4B02G097200	TraesCS5A02G374000	TraesCS6A02G138000	TraesCS6D02G325100	TraesCS1D02G098100	TraesCS2A02G381000	TraesCS5A02G295200
PL6_24h	Carotenoid_biosynthesis	9	0.321429	0.000171216	TraesCS7A02G418900	TraesCS5B02G029300	TraesCS5D02G038800	TraesCS5A02G374000	TraesCS5B02G358800	TraesCS5A02G356300	TraesCS5D02G383500	TraesCS5D02G365100	TraesCS5B02G375900
PL6_24h	Cyanoamino_acid_metabolism	11	0.211538	0.000460799	TraesCS3A02G447500	TraesCS3B02G483500	TraesCS2D02G512100	TraesCS5A02G295200	TraesCS2D02G511800	TraesCS2B02G538800	TraesCS2A02G510400	TraesCS2B02G538600	TraesCS2A02G510800	TraesCS2B02G538700	TraesCS2D02G381200
PL6_24h	Cysteine_and_methionine_metabolism	11	0.107843	0.0260569	TraesCS5D02G241100	TraesCS6A02G219500	TraesCS5B02G232700	TraesCS1A02G089600	TraesCS1A02G089500	TraesCS1D02G184500	TraesCS6D02G202500	TraesCS6A02G325400	TraesCS1A02G181000	TraesCS1B02G199600	TraesCS1D02G098100
PL6_24h	Diterpenoid_biosynthesis	6	0.222222	0.0111319	TraesCS1A02G334400	TraesCS1D02G336900	TraesCS3B02G166100	TraesCS2B02G445300	TraesCS1B02G347600	TraesCS3D02G149600
PL6_24h	Flavonoid_biosynthesis	8	0.170213	0.00978772	TraesCS5A02G222700	TraesCS3D02G224600	TraesCS3A02G342900	TraesCS3D02G325300	TraesCS5B02G221700	TraesCS2D02G034500	TraesCS3A02G226600	TraesCS3B02G375100
PL6_24h	Galactose_metabolism	11	0.2	0.000645817	TraesCS3D02G092900	TraesCS4B02G356800	TraesCS3B02G108000	TraesCS1B02G478400	TraesCS1A02G443900	TraesCS2A02G331700	TraesCS2B02G109800	TraesCS3A02G092800	TraesCS2A02G097400	TraesCS1D02G451900	TraesCS2B02G403000
PL6_24h	Histidine_metabolism	6	0.315789	0.00296672	TraesCS3D02G519600	TraesCS5B02G210100	TraesCS5A02G213600	TraesCS3A02G512400	TraesCS5D02G127300	TraesCS5D02G218400
PL6_24h	Linoleic_acid_metabolism	8	0.571429	2.26e-05	TraesCS7D02G244800	TraesCS5D02G388800	TraesCS2D02G313400	TraesCS5B02G382300	TraesCS4D02G035200	TraesCS2A02G315100	TraesCS6D02G154600	TraesCS5A02G378700
PL6_24h	Lysine_degradation	8	0.181818	0.00686314	TraesCS1D02G118300	TraesCS5A02G213600	TraesCS5B02G210100	TraesCS6B02G376200	TraesCS6A02G344000	TraesCS5D02G127300	TraesCS6D02G325100	TraesCS5D02G218400
PL6_24h	MAPK_signaling_pathway_-_plant	34	0.234483	2.78e-12	TraesCS2D02G000300	TraesCS1A02G358600	TraesCS4D02G210900	TraesCS3B02G277900	TraesCS2A02G000400	TraesCS1D02G363500	TraesCS1B02G375100	TraesCS4A02G094300	TraesCS3D02G249000	TraesCS3D02G212100	TraesCS4B02G210100	TraesCS2B02G023600	TraesCS1D02G218200	TraesCS2B02G521800	TraesCS1B02G229400	TraesCS3A02G249000	TraesCS3A02G209200	TraesCS3D02G355900	TraesCS3B02G394600	TraesCS7B02G322900	TraesCS3B02G240000	TraesCS5A02G183600	TraesCS5A02G183300	TraesCS1D02G072900	TraesCS3D02G238000	TraesCS2D02G493700	TraesCS2A02G493800	TraesCS5B02G182000	TraesCS1B02G088900	TraesCS3A02G362200	TraesCS1D02G372500	TraesCS7D02G403700	TraesCS7D02G161200	TraesCS5D02G188600
PL6_24h	Phenylalanine_metabolism	6	0.157895	0.0348224	TraesCS2B02G398200	TraesCS2A02G380900	TraesCS2D02G377600	TraesCS2B02G398300	TraesCS2A02G381100	TraesCS2A02G381000
PL6_24h	Phenylpropanoid_biosynthesis	23	0.103604	0.00128892	TraesCS2A02G380900	TraesCS7A02G319100	TraesCS2B02G615800	TraesCS2B02G126200	TraesCS6D02G127100	TraesCS2D02G381200	TraesCS7D02G370400	TraesCS2B02G398300	TraesCS3A02G447500	TraesCS3B02G483500	TraesCS5A02G222700	TraesCS3A02G342900	TraesCS2D02G377600	TraesCS2A02G381100	TraesCS6A02G138000	TraesCS7B02G251100	TraesCS3B02G375100	TraesCS2A02G381000	TraesCS5A02G295200	TraesCS2B02G398200	TraesCS5B02G221700	TraesCS5D02G210600	TraesCS3D02G325300
PL6_24h	Photosynthesis_-_antenna_proteins	9	0.5	1.27e-05	TraesCS1D02G411600	TraesCS5B02G463000	TraesCS5B02G463100	TraesCS7B02G103300	TraesCS1D02G306200	TraesCS5B02G462800	TraesCS1B02G388200	TraesCS5D02G464900	TraesCS1A02G403800
PL6_24h	Plant_hormone_signal_transduction	47	0.204348	7.78e-15	TraesCS2D02G000300	TraesCS5B02G211000	TraesCS1A02G358600	TraesCS1B02G265900	TraesCS4D02G210900	TraesCS5A02G204900	TraesCS3B02G277900	TraesCS2A02G000400	TraesCS1D02G363500	TraesCS3A02G105400	TraesCS1B02G375100	TraesCS4A02G094300	TraesCS3D02G249000	TraesCS5A02G212800	TraesCS1D02G254500	TraesCS3D02G212100	TraesCS4B02G210100	TraesCS2B02G023600	TraesCS6D02G312800	TraesCS1D02G218200	TraesCS2B02G521800	TraesCS5D02G219300	TraesCS6B02G364000	TraesCS1B02G229400	TraesCS3A02G249000	TraesCS7A02G170600	TraesCS3A02G209200	TraesCS7B02G075600	TraesCS3D02G355900	TraesCS3B02G394600	TraesCS7D02G419900	TraesCS1A02G255100	TraesCS3B02G240000	TraesCS5A02G183600	TraesCS7D02G171300	TraesCS4D02G295900	TraesCS5A02G183300	TraesCS3D02G238000	TraesCS2D02G493700	TraesCS2A02G493800	TraesCS6A02G333600	TraesCS5B02G182000	TraesCS7B02G327700	TraesCS7A02G427600	TraesCS3A02G362200
PL6_24h	Starch_and_sucrose_metabolism	30	0.202703	1.4e-09	TraesCS4B02G356800	TraesCS1A02G183000	TraesCS4A02G446700	TraesCS5B02G193100	TraesCS1A02G210400	TraesCS2D02G381200	TraesCS5A02G247200	TraesCS1D02G213700	TraesCS5B02G202200	TraesCS1A02G215500	TraesCS2B02G194200	TraesCS2B02G403000	TraesCS5A02G513200	TraesCS3A02G447500	TraesCS3B02G483500	TraesCS5D02G210000	TraesCS4A02G140000	TraesCS1D02G218000	TraesCS6B02G384500	TraesCS7B02G111700	TraesCS4B02G344300	TraesCS1B02G224300	TraesCS4D02G339400	TraesCS4D02G169800	TraesCS5A02G295200	TraesCS7A02G204500	TraesCS5A02G203500	TraesCS6A02G248400	TraesCS1B02G229000	TraesCS7D02G207600
PL6_3h	Alanine,_aspartate_and_glutamate_metabolism	6	0.113208	0.00450467	TraesCS5A02G153900	TraesCS5B02G152600	TraesCS5D02G159100	TraesCS3A02G515300	TraesCS2B02G538700	TraesCS3A02G077100
PL6_3h	Arginine_and_proline_metabolism	10	0.208333	2.32e-06	TraesCS3A02G363700	TraesCS3D02G357200	TraesCS1B02G223300	TraesCS7A02G350100	TraesCS1A02G209100	TraesCS5B02G210100	TraesCS3B02G395900	TraesCS1D02G280700	TraesCS1D02G212400	TraesCS5D02G218400
PL6_3h	Biosynthesis_of_amino_acids	13	0.0585586	0.00367116	TraesCS4B02G235400	TraesCS3A02G363700	TraesCS5A02G153900	TraesCS5B02G152600	TraesCS2B02G350500	TraesCS5D02G159100	TraesCS2A02G331700	TraesCS4D02G264500	TraesCS3B02G395900	TraesCS1D02G280700	TraesCS3D02G357200	TraesCS2D02G331200	TraesCS3A02G077100
PL6_3h	Biosynthesis_of_secondary_metabolites	58	0.0504787	2.65e-09	TraesCS2A02G331700	TraesCS1D02G042100	TraesCS3D02G357200	TraesCS1A02G209100	TraesCS5A02G004900	TraesCS5D02G487900	TraesCS4D02G238700	TraesCS7B02G070100	TraesCS5D02G159100	TraesCS6D02G135300	TraesCS3B02G395900	TraesCS2B02G615800	TraesCS5D02G241000	TraesCS5A02G234300	TraesCS5D02G195500	TraesCS5B02G152600	TraesCS3A02G363700	TraesCS5B02G375900	TraesCS1D02G212400	TraesCS1B02G223300	TraesCS7A02G238900	TraesCS4B02G071500	TraesCS2B02G350500	TraesCS2D02G154300	TraesCS5D02G365100	TraesCS1D02G280700	TraesCS4D02G238800	TraesCS5B02G232700	TraesCS2D02G331200	TraesCS5D02G218400	TraesCS3A02G077100	TraesCS4B02G235400	TraesCS5D02G241100	TraesCS2B02G189700	TraesCS5A02G153900	TraesCS5A02G004700	TraesCS2A02G493500	TraesCS4B02G097200	TraesCS7B02G103800	TraesCS5A02G374000	TraesCS5B02G358800	TraesCS3A02G515300	TraesCS5D02G383500	TraesCS2B02G538700	TraesCS7B02G251100
PL6_3h	Carotenoid_biosynthesis	7	0.25	6.23e-05	TraesCS5A02G374000	TraesCS5B02G358800	TraesCS5A02G356300	TraesCS5D02G383500	TraesCS6A02G392000	TraesCS5D02G365100	TraesCS5B02G375900
PL6_3h	Cysteine_and_methionine_metabolism	10	0.0980392	0.000702842	TraesCS4B02G235400	TraesCS5D02G241100	TraesCS5A02G234200	TraesCS7A02G350100	TraesCS1D02G184500	TraesCS5B02G232700	TraesCS5D02G241000	TraesCS1A02G181000	TraesCS1B02G199600	TraesCS5A02G234300
PL6_3h	Glycolysis_/_Gluconeogenesis	9	0.0708661	0.0055592	TraesCS2B02G189700	TraesCS2B02G350500	TraesCS7B02G103800	TraesCS7A02G238900	TraesCS5B02G210100	TraesCS2A02G331700	TraesCS2D02G331200	TraesCS5D02G218400	TraesCS7D02G199900
PL6_3h	MAPK_signaling_pathway_-_plant	30	0.206897	3.09e-18	TraesCS2D02G000300	TraesCS2A02G099900	TraesCS1A02G358600	TraesCS4D02G210900	TraesCS2B02G105300	TraesCS3B02G277900	TraesCS2A02G000400	TraesCS1D02G363500	TraesCS1B02G375100	TraesCS4A02G094300	TraesCS3D02G249000	TraesCS5B02G181500	TraesCS3D02G212100	TraesCS4B02G210100	TraesCS2B02G023600	TraesCS1A02G215900	TraesCS1D02G218200	TraesCS1B02G229400	TraesCS3A02G249000	TraesCS3D02G355900	TraesCS3B02G394600	TraesCS3B02G240000	TraesCS5A02G183600	TraesCS3A02G209200	TraesCS3D02G238000	TraesCS5B02G182000	TraesCS3A02G362200	TraesCS4B02G189800	TraesCS7D02G161200	TraesCS5D02G188600
PL6_3h	Plant_hormone_signal_transduction	39	0.169565	6.9e-21	TraesCS2D02G000300	TraesCS2A02G099900	TraesCS1A02G358600	TraesCS4D02G210900	TraesCS2B02G105300	TraesCS3B02G277900	TraesCS2A02G000400	TraesCS1D02G363500	TraesCS1B02G375100	TraesCS4A02G094300	TraesCS3D02G249000	TraesCS5B02G181500	TraesCS3B02G548600	TraesCS3D02G212100	TraesCS4B02G210100	TraesCS2B02G023600	TraesCS1A02G215900	TraesCS6D02G312800	TraesCS1D02G218200	TraesCS6B02G364000	TraesCS1B02G229400	TraesCS3A02G249000	TraesCS7A02G170600	TraesCS3D02G355900	TraesCS3B02G394600	TraesCS5B02G132900	TraesCS2B02G326800	TraesCS3B02G240000	TraesCS5A02G183600	TraesCS7D02G171300	TraesCS7D02G161200	TraesCS3D02G238000	TraesCS6A02G333600	TraesCS5B02G182000	TraesCS3A02G362200	TraesCS3D02G494600	TraesCS4B02G189800	TraesCS3A02G209200	TraesCS5D02G188600
PL6_3h	Starch_and_sucrose_metabolism	13	0.0878378	0.000198665	TraesCS5B02G202200	TraesCS5D02G210000	TraesCS4A02G140000	TraesCS7A02G204500	TraesCS6B02G384500	TraesCS5A02G203500	TraesCS4D02G169800	TraesCS4B02G344300	TraesCS3A02G400000	TraesCS5A02G513200	TraesCS4D02G339400	TraesCS7D02G207600	TraesCS4B02G167500
PL6_3h	Valine,_leucine_and_isoleucine_degradation	7	0.159091	0.000663378	TraesCS4B02G235400	TraesCS1D02G067800	TraesCS5A02G053700	TraesCS1A02G066800	TraesCS5B02G210100	TraesCS4B02G071500	TraesCS5D02G218400
PL6_48h	Alanine,_aspartate_and_glutamate_metabolism	16	0.301887	2.26e-05	TraesCS2D02G511800	TraesCS5A02G153900	TraesCS5B02G152600	TraesCS5D02G159100	TraesCS7B02G253600	TraesCS3B02G415900	TraesCS2D02G512100	TraesCS2A02G510400	TraesCS3A02G383500	TraesCS2B02G538600	TraesCS2A02G510800	TraesCS2A02G510700	TraesCS4B02G288100	TraesCS3D02G376600	TraesCS1B02G374500	TraesCS2B02G538700
PL6_48h	alpha-Linolenic_acid_metabolism	13	0.288889	0.000252606	TraesCS7B02G455300	TraesCS3A02G303600	TraesCS6D02G010100	TraesCS7D02G143200	TraesCS2B02G040000	TraesCS2A02G026600	TraesCS1B02G127500	TraesCS3D02G298200	TraesCS7A02G537100	TraesCS7A02G141800	TraesCS6B02G353200	TraesCS7B02G044200	TraesCS4A02G202100
PL6_48h	Amino_sugar_and_nucleotide_sugar_metabolism	23	0.172932	0.000359424	TraesCS3B02G293200	TraesCS3A02G260100	TraesCS2B02G369000	TraesCS5A02G247200	TraesCS6A02G112800	TraesCS6D02G102400	TraesCS2A02G350800	TraesCS1A02G203600	TraesCS5D02G182600	TraesCS6A02G071400	TraesCS3A02G260200	TraesCS3D02G260300	TraesCS1D02G207100	TraesCS4B02G127600	TraesCS3D02G260500	TraesCS1A02G250000	TraesCS1A02G203700	TraesCS5D02G408200	TraesCS6D02G069600	TraesCS4A02G173800	TraesCS5B02G403700	TraesCSU02G026500	TraesCS2D02G033100
PL6_48h	Arginine_and_proline_metabolism	12	0.25	0.0013307	TraesCS2D02G549300	TraesCS5B02G376900	TraesCS5A02G375000	TraesCS5D02G384500	TraesCS2B02G048700	TraesCS5B02G210100	TraesCS5A02G213600	TraesCS3B02G395900	TraesCS1B02G374500	TraesCS5D02G127300	TraesCS7D02G265900	TraesCS5D02G218400
PL6_48h	Ascorbate_and_aldarate_metabolism	10	0.196078	0.016247	TraesCS6D02G069600	TraesCS5A02G213600	TraesCS7B02G269900	TraesCS5B02G210100	TraesCS7D02G299500	TraesCS6B02G301300	TraesCS6A02G071400	TraesCS5B02G111700	TraesCS5D02G127300	TraesCS5D02G218400
PL6_48h	beta-Alanine_metabolism	13	0.325	9.33e-05	TraesCS5B02G542300	TraesCS2B02G501200	TraesCS5D02G127300	TraesCS7D02G143200	TraesCS2D02G549300	TraesCS5A02G213600	TraesCS5B02G210100	TraesCS2A02G477900	TraesCS7A02G141800	TraesCS2D02G075000	TraesCS7B02G044200	TraesCS7D02G265900	TraesCS5D02G218400
PL6_48h	Biosynthesis_of_secondary_metabolites	220	0.191471	3.1e-43	TraesCS2A02G501900	TraesCS5D02G303000	TraesCS6A02G305400	TraesCS1A02G223300	TraesCS2A02G467700	TraesCS5D02G487900	TraesCS2A02G067000	TraesCS5B02G246400	TraesCS5A02G389000	TraesCS7A02G319100	TraesCS2B02G124800	TraesCS6B02G353200	TraesCS2D02G136200	TraesCS1D02G100100	TraesCS3A02G297200	TraesCS6D02G219700	TraesCS2B02G445800	TraesCS7D02G347300	TraesCS4B02G085900	TraesCS7D02G117800	TraesCS3B02G415900	TraesCS1B02G127500	TraesCS2D02G264400	TraesCS3A02G250200	TraesCS5D02G218400	TraesCS6D02G287000	TraesCS5A02G222700	TraesCS2D02G065200	TraesCS3A02G265900	TraesCS2D02G065600	TraesCS2D02G468900	TraesCS7D02G360700	TraesCS7A02G130000	TraesCS5A02G494200	TraesCS3B02G299300	TraesCS5A02G213600	TraesCS6A02G247900	TraesCS7A02G141800	TraesCS6A02G325400	TraesCS2D02G107600	TraesCSU02G008800	TraesCS2B02G445500	TraesCS5D02G011800	TraesCS5D02G127300	TraesCS3B02G395600
PL6_48h	Biosynthesis_of_unsaturated_fatty_acids	6	0.222222	0.0489512	TraesCS7D02G143200	TraesCS2D02G114200	TraesCS2A02G113600	TraesCS7A02G141800	TraesCS2B02G269300	TraesCS7B02G044200
PL6_48h	Carbon_fixation_in_photosynthetic_organisms	25	0.373134	2.56e-09	TraesCS2B02G079400	TraesCS1B02G264900	TraesCS2B02G079500	TraesCS2A02G066700	TraesCS2A02G067000	TraesCS3A02G134200	TraesCS2A02G067100	TraesCS2A02G067200	TraesCS1D02G252900	TraesCS7D02G333900	TraesCS7B02G237900	TraesCS2D02G065400	TraesCS2A02G066900	TraesCS1D02G274000	TraesCS7A02G345400	TraesCS2D02G065200	TraesCS7B02G197000	TraesCS3D02G150500	TraesCS2D02G065600	TraesCS2A02G067300	TraesCS6A02G267300	TraesCS2D02G065300	TraesCS1A02G253400	TraesCS6D02G247400	TraesCS6B02G294700
PL6_48h	Carbon_metabolism	44	0.181818	6.79e-08	TraesCS2B02G079400	TraesCS1B02G264900	TraesCS2B02G079500	TraesCS2A02G066700	TraesCS2A02G067000	TraesCS3B02G279700	TraesCS3A02G134200	TraesCS2A02G067100	TraesCS2A02G348500	TraesCS7B02G044200	TraesCS2A02G067200	TraesCS1D02G252900	TraesCS5A02G247200	TraesCS2D02G346900	TraesCS4A02G401700	TraesCS7D02G143200	TraesCS7D02G333900	TraesCS7B02G237900	TraesCS2A02G477900	TraesCS2D02G065400	TraesCS2A02G066900	TraesCS1D02G274000	TraesCS7A02G345400	TraesCS2D02G010700	TraesCS2D02G065200	TraesCS3A02G265900	TraesCS2A02G467700	TraesCS3B02G299300	TraesCS7A02G141800	TraesCS7B02G197000	TraesCS3D02G150500	TraesCS7A02G102800	TraesCS3D02G250600	TraesCS2D02G065600	TraesCS2B02G501200	TraesCS2A02G067300	TraesCS6A02G267300	TraesCS2D02G065300	TraesCS3A02G250200	TraesCS1A02G253400	TraesCS6D02G247400	TraesCS1B02G226500	TraesCS2B02G366900	TraesCS6B02G294700
PL6_48h	Carotenoid_biosynthesis	7	0.25	0.0212191	TraesCS2A02G317000	TraesCS4D02G314400	TraesCS2B02G335400	TraesCS5A02G494200	TraesCS2A02G238400	TraesCS4B02G318000	TraesCS2D02G314900
PL6_48h	Circadian_rhythm_-_plant	14	0.318182	5.41e-05	TraesCS4B02G379300	TraesCS4B02G115100	TraesCS4B02G198700	TraesCS7A02G299400	TraesCSU02G129600	TraesCS3A02G116300	TraesCS5A02G545600	TraesCSU02G196100	TraesCS6D02G207100	TraesCS3B02G135400	TraesCS3D02G118200	TraesCS4D02G112800	TraesCS5D02G488700	TraesCS4D02G199600
PL6_48h	Cyanoamino_acid_metabolism	17	0.326923	5.64e-06	TraesCS3A02G447500	TraesCS3B02G483500	TraesCS2D02G511800	TraesCS5D02G399000	TraesCS5D02G303000	TraesCS5B02G394200	TraesCS2D02G512100	TraesCS3D02G440200	TraesCS5B02G295000	TraesCS2A02G510400	TraesCS2B02G538600	TraesCS2A02G342800	TraesCS2A02G510800	TraesCS2A02G510700	TraesCS2B02G538700	TraesCS5A02G389000	TraesCS6B02G261000
PL6_48h	Cysteine_and_methionine_metabolism	14	0.137255	0.0360222	TraesCS6A02G247900	TraesCS4A02G401700	TraesCS5B02G232700	TraesCS6A02G325600	TraesCS4B02G278100	TraesCS6A02G325400	TraesCS7A02G102800	TraesCS4D02G153400	TraesCS4B02G288100	TraesCS4D02G276500	TraesCS4A02G027700	TraesCS1B02G199600	TraesCS7D02G265900	TraesCS5D02G534600
PL6_48h	Diterpenoid_biosynthesis	14	0.518519	8.1e-07	TraesCS2D02G029500	TraesCS7D02G360700	TraesCS2B02G445300	TraesCS5D02G487900	TraesCS2D02G029900	TraesCSU02G008700	TraesCSU02G009100	TraesCS2B02G445600	TraesCS2A02G027800	TraesCSU02G008900	TraesCS2B02G445200	TraesCS2D02G030000	TraesCS2B02G445500	TraesCSU02G008800
PL6_48h	Fatty_acid_degradation	9	0.1875	0.0286729	TraesCS1B02G127500	TraesCS7D02G143200	TraesCS5B02G210100	TraesCS5A02G213600	TraesCS7A02G141800	TraesCS5D02G218400	TraesCS5D02G127300	TraesCS7B02G044200	TraesCS4A02G202100
PL6_48h	Flavonoid_biosynthesis	11	0.234043	0.00369123	TraesCS4D02G339800	TraesCS5A02G222700	TraesCS3D02G224600	TraesCS2D02G568200	TraesCS5D02G488700	TraesCS5B02G221700	TraesCS4B02G344800	TraesCS3B02G257900	TraesCS2D02G493400	TraesCS2B02G521500	TraesCS3A02G226600
PL6_48h	Glutathione_metabolism	23	0.214953	2.24e-05	TraesCS2B02G604800	TraesCS1A02G095800	TraesCS3D02G483000	TraesCS2A02G342800	TraesCS2A02G045400	TraesCS3D02G299700	TraesCS7D02G348500	TraesCS6B02G429400	TraesCS6B02G337600	TraesCS4B02G059100	TraesCS5D02G030000	TraesCS1A02G186600	TraesCS4B02G059300	TraesCS2D02G598000	TraesCS4B02G200100	TraesCS4D02G201100	TraesCS7B02G252500	TraesCS1A02G186100	TraesCS1A02G186800	TraesCS7D02G078700	TraesCS7D02G265900	TraesCS1D02G191100	TraesCS2D02G044100
PL6_48h	Glycerolipid_metabolism	14	0.159091	0.0147004	TraesCS3A02G303600	TraesCS3A02G265900	TraesCSU02G240500	TraesCS3A02G363400	TraesCS3D02G356900	TraesCS3B02G299300	TraesCS3B02G395600	TraesCS5B02G210100	TraesCS5A02G213600	TraesCS4D02G143200	TraesCS3D02G298200	TraesCS2A02G515700	TraesCS5D02G127300	TraesCS5D02G218400
PL6_48h	Glycine,_serine_and_threonine_metabolism	11	0.177419	0.0191158	TraesCS3A02G265900	TraesCS3A02G250200	TraesCS3B02G299300	TraesCS3B02G279700	TraesCS5B02G210100	TraesCS5A02G213600	TraesCS4B02G288100	TraesCS2D02G075000	TraesCS5D02G218400	TraesCS3D02G250600	TraesCS5D02G534600
PL6_48h	Glyoxylate_and_dicarboxylate_metabolism	24	0.380952	3.89e-09	TraesCS2B02G079400	TraesCS2B02G079500	TraesCS2A02G066700	TraesCS2A02G067000	TraesCS3B02G279700	TraesCS2A02G067100	TraesCS2A02G348500	TraesCS2A02G067200	TraesCS2B02G152900	TraesCS2D02G346900	TraesCS2D02G065400	TraesCS2A02G066900	TraesCS2D02G132900	TraesCS2D02G065200	TraesCS3A02G265900	TraesCS2A02G467700	TraesCS3B02G299300	TraesCS3D02G250600	TraesCS2D02G065600	TraesCS2A02G130600	TraesCS2A02G067300	TraesCS3A02G250200	TraesCS2B02G366900	TraesCS2D02G065300
PL6_48h	MAPK_signaling_pathway_-_plant	32	0.22069	1.9e-07	TraesCS3B02G293200	TraesCS7A02G198800	TraesCS7A02G154900	TraesCS7A02G198900	TraesCS3A02G260100	TraesCS4B02G293600	TraesCS1A02G070400	TraesCS5B02G181500	TraesCS1A02G203600	TraesCS4D02G036000	TraesCS5B02G075800	TraesCS7B02G105300	TraesCS2A02G166200	TraesCS3B02G365900	TraesCS1A02G250000	TraesCS3A02G260200	TraesCS3D02G260300	TraesCS5D02G081700	TraesCS1D02G207100	TraesCS3D02G328300	TraesCS3D02G260500	TraesCS5D02G446800	TraesCS1A02G203700	TraesCS5D02G408200	TraesCS7D02G201300	TraesCS5A02G183300	TraesCS7D02G201400	TraesCS5B02G403700	TraesCS2B02G133000	TraesCS5A02G069500	TraesCS7D02G161200	TraesCS2D02G033100
PL6_48h	Nitrogen_metabolism	8	0.258065	0.010738	TraesCS2A02G130600	TraesCS3D02G223300	TraesCS2B02G152900	TraesCS4B02G297300	TraesCS3B02G259300	TraesCS6D02G020700	TraesCS3A02G230000	TraesCS2D02G132900
PL6_48h	Phenylpropanoid_biosynthesis	37	0.166667	5.9e-06	TraesCS5D02G303000	TraesCS5B02G223700	TraesCS6D02G054900	TraesCS2D02G568200	TraesCS5A02G389000	TraesCS7A02G319100	TraesCS7A02G339600	TraesCS2B02G615800	TraesCS2B02G124800	TraesCS3A02G297200	TraesCS2A02G107600	TraesCS7D02G347300	TraesCS7D02G370400	TraesCS3D02G305300	TraesCS2A02G573900	TraesCS5D02G364600	TraesCS5A02G225100	TraesCS6B02G063900	TraesCS3A02G447500	TraesCS3B02G483500	TraesCS5A02G222700	TraesCS5D02G399000	TraesCS2D02G583000	TraesCS3D02G440200	TraesCS5B02G394200	TraesCS5B02G295000	TraesCS2D02G107600	TraesCS2B02G124600	TraesCS7B02G251100	TraesCS1B02G115900	TraesCS2B02G615600	TraesCS4A02G401300	TraesCS2A02G571300	TraesCS5B02G221700	TraesCS5B02G414300	TraesCS2D02G583200	TraesCS5B02G405300
PL6_48h	Plant-pathogen_interaction	19	0.117284	0.0409156	TraesCS5D02G446800	TraesCS7D02G201300	TraesCS5A02G183300	TraesCS7A02G242200	TraesCS7A02G198800	TraesCS7A02G154900	TraesCS3D02G328300	TraesCS2A02G515700	TraesCS7B02G105300	TraesCS7A02G198900	TraesCS2A02G166200	TraesCS7D02G517800	TraesCS7D02G201400	TraesCS7D02G241100	TraesCS3B02G365900	TraesCS1A02G070400	TraesCS7D02G161200	TraesCS7B02G149200	TraesCS5B02G181500
PL6_48h	Propanoate_metabolism	7	0.241379	0.02406	TraesCS2A02G074700	TraesCS2B02G501200	TraesCS7D02G143200	TraesCS2A02G477900	TraesCS7A02G141800	TraesCS7B02G044200	TraesCS2D02G073400
PL6_48h	Purine_metabolism	13	0.136842	0.0427137	TraesCS7B02G383900	TraesCS5A02G547700	TraesCS5B02G207900	TraesCS5D02G216100	TraesCS3B02G415900	TraesCS6B02G113200	TraesCS2B02G377500	TraesCS3D02G369200	TraesCS3A02G383500	TraesCS4B02G167000	TraesCS1B02G226500	TraesCS3D02G376600	TraesCS2D02G356900
PL6_48h	Pyruvate_metabolism	16	0.207792	0.000831687	TraesCS7B02G197000	TraesCS1A02G253400	TraesCS7A02G345400	TraesCS2D02G010700	TraesCS1B02G264900	TraesCS3A02G134200	TraesCS7D02G333900	TraesCS7B02G237900	TraesCS5B02G210100	TraesCS5A02G213600	TraesCS1B02G226500	TraesCS5A02G131300	TraesCS3D02G150500	TraesCS5D02G127300	TraesCS1D02G252900	TraesCS5D02G218400
PL6_48h	Starch_and_sucrose_metabolism	40	0.27027	3.81e-11	TraesCS5D02G303000	TraesCS2B02G491700	TraesCS3A02G248000	TraesCS3B02G483500	TraesCS6B02G384500	TraesCS2A02G161200	TraesCS1B02G257700	TraesCS5B02G246400	TraesCS5A02G389000	TraesCS3D02G248000	TraesCS4A02G446700	TraesCS7D02G159800	TraesCS5A02G247200	TraesCS5B02G202200	TraesCS7A02G120300	TraesCS1B02G119300	TraesCS1D02G100100	TraesCS5D02G182600	TraesCS2B02G145700	TraesCS2B02G194200	TraesCS5A02G513200	TraesCS3A02G447500	TraesCS6D02G287000	TraesCS5D02G210000	TraesCS5D02G399000	TraesCS2D02G468900	TraesCS3D02G440200	TraesCS5B02G394200	TraesCS4B02G344300	TraesCS5B02G295000	TraesCS7B02G018600	TraesCS6D02G334000	TraesCS6A02G301800	TraesCS2B02G390700	TraesCS7D02G117800	TraesCS1A02G339300	TraesCS6A02G307800	TraesCS5A02G203500	TraesCS2A02G468800	TraesCS2B02G240200
PL6_48h	Steroid_biosynthesis	15	0.375	5.96e-06	TraesCS7B02G253700	TraesCS3A02G303600	TraesCS5D02G012000	TraesCS5D02G011900	TraesCS5A02G004900	TraesCS5A02G004800	TraesCS3D02G298200	TraesCS5D02G011800	TraesCS7A02G259100	TraesCS4D02G093600	TraesCS5A02G004500	TraesCS3A02G025900	TraesCS5A02G004600	TraesCS5D02G012300	TraesCS5A02G004700
PL6_48h	Sulfur_metabolism	7	0.225806	0.0301234	TraesCS4A02G401700	TraesCS6A02G233100	TraesCS2D02G231100	TraesCS6D02G216000	TraesCS6B02G260100	TraesCS3B02G457600	TraesCS7A02G102800
PL6_48h	Terpenoid_backbone_biosynthesis	16	0.296296	2.68e-05	TraesCS2A02G501900	TraesCS3A02G231000	TraesCS2A02G565400	TraesCS1A02G420900	TraesCS3D02G255200	TraesCS2B02G626400	TraesCS1D02G428800	TraesCS7A02G130000	TraesCS2D02G575800	TraesCS2D02G423500	TraesCS1B02G452100	TraesCS4D02G263100	TraesCS2B02G445800	TraesCS7B02G030000	TraesCS2D02G423400	TraesCS2B02G530100
PL6_48h	Thiamine_metabolism	7	0.35	0.00537424	TraesCS2A02G565400	TraesCS4B02G023800	TraesCS2B02G626400	TraesCS2D02G575800	TraesCS6B02G113200	TraesCS4A02G290400	TraesCS4D02G021400
PL6_48h	Valine,_leucine_and_isoleucine_degradation	14	0.318182	5.41e-05	TraesCS2A02G074700	TraesCS2B02G501200	TraesCS1D02G067800	TraesCS4A02G401400	TraesCS5A02G213600	TraesCS1A02G066800	TraesCS1B02G085100	TraesCS5B02G210100	TraesCS2A02G477900	TraesCS4B02G288100	TraesCS5D02G127300	TraesCS3D02G189400	TraesCS2D02G073400	TraesCS5D02G218400
[truncated: 175 more columns]
