# Supplementary material for: Identification and transcriptomic profiling of salinity stress response genes in colored wheat mutant
Source: PeerJ. 2024 Mar 6;12:e17043. doi: 10.7717/peerj.17043 (PMC10924784; doi:10.7717/peerj.17043)
Supplement: Supplemental Information 10 [file peerj-12-17043-s010.xlsx]

## Sheet: Sheet1
Supplementary Table 7. Differentially express genes in red boxes of Fig. 6B used in Fig. 6C.
Groups	Genes	Samples (TPM)
		PL1_0h_1	PL1_0h_2	PL1_3h_1	PL1_3h_2	PL1_24h_1	PL1_24h_2	PL1_48h_1	PL1_48h_2	PL6_0h_1	PL6_0h_2	PL6_3h_1	PL6_3h_2	PL6_24h_1	PL6_24h_2	PL6_48h_1	PL6_48h_2
DEGs cluster 2 in Fig 6B	TraesCS6A02G094200_ERF_family_protein	0.934268	0.919209	0.0017042	0.553435	-1.35218	-0.11376	-1.08607	-0.450709	1.30451	0.339645	1.29355	1.04416	0.335637	-0.705807	-1.56996	-1.44763
	TraesCS1D02G375100_ERF_family_protein	0.779351	0.806597	0.105943	0.727835	-1.18316	-0.0983983	-1.12542	-0.57608	1.29581	0.358583	1.34384	1.12095	0.233362	-0.696131	-1.55939	-1.53368
	TraesCS1D02G306200_ERF_family_protein	0.849323	0.875247	0.0548045	0.712525	-1.24938	-0.0690002	-0.862866	-0.229925	1.31558	0.350083	1.24542	1.05323	0.118279	-0.922699	-1.68719	-1.55343
	TraesCS5A02G454300_ERF_family_protein	0.959587	0.992624	0.0396449	0.757803	-1.16569	0.151279	-1.0332	-0.403036	1.24695	0.140101	1.14117	0.929669	0.316253	-0.76802	-1.73471	-1.57042
	TraesCS1B02G317500_ERF_family_protein	1.07243	1.08602	0.169816	0.74677	-1.40614	-0.264435	-1.03521	-0.406444	1.27749	0.326274	1.13265	0.913281	0.134599	-0.848145	-1.49995	-1.39901
	TraesCS1A02G306600_ERF_family_protein	0.968236	0.941016	-0.101181	0.549488	-1.40821	-0.114443	-0.864055	-0.141866	1.32577	0.266697	1.25408	1.01467	0.306357	-0.934756	-1.62021	-1.44159
	TraesCS7A02G238400_ERF_family_protein	0.988023	0.950938	0.156485	0.74905	-1.13861	0.0995856	-0.828677	-0.201447	1.05378	0.0226119	1.23406	0.94192	0.311156	-0.82514	-1.876	-1.63775
	TraesCS5B02G462900_ERF_family_protein	0.690911	0.746093	0.16197	0.673981	-1.02039	-0.140498	-1.02037	-0.49428	1.22055	0.448289	1.39711	1.15668	0.156895	-0.568769	-1.74021	-1.66797
	TraesCS1B02G388200_ERF_family_protein	0.858233	0.920529	0.367344	0.703733	-1.08209	-0.0310643	-1.14736	-0.540628	1.0136	0.262271	1.3436	1.13717	0.132876	-0.682293	-1.74428	-1.51163
	TraesCS5D02G464700_ERF_family_protein	0.650529	0.664993	0.15078	0.853432	-1.47526	-0.163985	-0.998468	-0.336117	1.1426	0.225073	1.55304	1.25375	0.162466	-0.884329	-1.45409	-1.34442
	TraesCS5D02G464800_ERF_family_protein	0.751265	0.812621	0.272929	0.860462	-1.12098	0.00773591	-1.06014	-0.386597	1.0001	0.0436333	1.45	1.19268	0.148041	-0.680232	-1.61759	-1.67392
	TraesCS5A02G454200_ERF_family_protein	0.768307	0.7609	0.345415	0.905075	-1.40064	-0.374288	-1.16954	-0.540498	1.16668	0.287738	1.37454	1.17591	0.164237	-0.660644	-1.50641	-1.29678
	TraesCS5B02G463000_ERF_family_protein	0.745169	0.769259	0.473226	0.905895	-1.0499	-0.203244	-0.999881	-0.515768	1.08334	0.345649	1.37276	1.1403	-0.0192489	-0.79703	-1.661	-1.58952
	TraesCS5B02G462800_ERF_family_protein	0.649394	0.752627	-0.00048475	0.496813	-0.885295	-0.0489344	-0.907582	-0.487083	1.23152	0.530244	1.39238	1.15673	0.244802	-0.514567	-1.8225	-1.78806
	TraesCS6A02G093700_ERF_family_protein	0.828721	0.833743	0.275685	0.916927	-1.08273	0.048097	-1.37834	-0.671233	1.02462	0.0463555	1.37733	1.1109	0.328365	-0.693869	-1.55136	-1.41322
	TraesCS6A02G094600_ERF_family_protein	0.607533	0.546455	0.0417371	0.702148	-1.3096	-0.315868	-0.938733	-0.473237	1.31275	0.259957	1.35445	1.15301	0.698546	-0.381451	-1.73601	-1.52168
	TraesCS7B02G103400_ERF_family_protein	0.734117	0.697098	0.0870772	0.616891	-1.4377	-0.271647	-1.28495	-0.527916	1.32265	0.240929	1.46121	1.25277	0.386809	-0.687249	-1.41375	-1.17635
	TraesCS6D02G088800_ERF_family_protein	0.853208	0.785923	-0.00113778	0.667209	-1.12998	0.294668	-1.17217	-0.473392	1.08341	-0.101871	1.38249	1.02789	0.647436	-0.610932	-1.70626	-1.5465
	TraesCS6A02G094300_ERF_family_protein	0.569486	0.507838	0.393065	0.817707	-1.1224	-0.213747	-1.05677	-0.473033	1.25552	0.457923	1.28087	1.12067	0.306486	-0.383507	-1.86948	-1.59063
	TraesCS7B02G103300_ERF_family_protein	0.692828	0.652536	0.164617	0.538705	-0.899066	-0.147619	-1.01865	-0.70776	1.25039	0.593842	1.2442	1.10014	0.399635	-0.264422	-1.9144	-1.68498
	TraesCS6B02G122600_ERF_family_protein	0.811166	0.706375	-0.182856	0.395941	-1.06409	0.130157	-1.05924	-0.496204	1.21642	0.173767	1.36363	1.12388	0.704154	-0.407621	-1.77171	-1.64377
	TraesCS1B02G388300_ERF_family_protein	0.531785	0.566528	-0.0790043	0.475601	-1.12081	-0.142263	-1.07936	-0.633148	1.28544	0.533008	1.51231	1.31366	0.426671	-0.426036	-1.55082	-1.61357
	TraesCS1D02G411600_ERF_family_protein	0.665517	0.596621	-0.0185486	0.529583	-1.36575	-0.410099	-0.920687	-0.379895	1.38271	0.528636	1.47094	1.35987	0.131977	-0.667437	-1.53164	-1.37179
	TraesCS6A02G094100_ERF_family_protein	0.794714	0.760603	-0.109735	0.301664	-1.09119	-0.291766	-0.989194	-0.782551	1.43757	0.543251	1.28411	1.13721	0.525564	-0.313506	-1.59637	-1.61038
	TraesCS6A02G094400_ERF_family_protein	0.467473	0.417098	0.0923405	0.71816	-1.21555	0.0439075	-1.16141	-0.512942	1.14144	0.147177	1.46949	1.2879	0.69887	-0.359284	-1.62003	-1.61465
	TraesCS1D02G374900_ERF_family_protein	0.746858	0.755119	-0.321713	0.554902	-0.99183	0.326672	-0.840184	-0.526683	1.38538	0.41761	1.14417	0.914478	0.552463	-0.481233	-1.83664	-1.79937
	TraesCS1D02G375000_ERF_family_protein	0.428951	0.450993	0.177011	0.588321	-0.850516	-0.0435463	-1.05467	-0.732043	1.29611	0.566605	1.37714	1.23847	0.358357	-0.282287	-1.88399	-1.6349
	TraesCS7D02G199400_ERF_family_protein	0.671857	0.666897	0.0611417	0.441759	-0.73275	0.0689719	-1.10318	-0.602428	1.22379	0.549218	1.19721	1.06231	0.456307	-0.190018	-2.06906	-1.70203
	TraesCS5D02G464900_ERF_family_protein	0.728643	0.719168	0.597668	0.937676	-0.879775	-0.264812	-1.13167	-0.757025	0.958045	0.446939	1.33744	1.18976	-0.0185049	-0.596704	-1.59421	-1.67265
	TraesCS1B02G433300_ERF_family_protein	0.678254	0.716421	-0.142946	0.677607	-1.61231	-0.331946	-0.882008	0.00428967	1.3756	0.15606	1.44871	1.17592	0.362071	-0.915985	-1.45433	-1.25542
	TraesCS5B02G463100_ERF_family_protein	0.651484	0.699652	0.582309	1.02718	-1.12939	-0.207586	-1.08151	-0.67655	0.951275	0.23436	1.47257	1.28379	-0.0477537	-0.848478	-1.52368	-1.38768
	TraesCS6A02G094500_ERF_family_protein	0.303159	0.22782	0.191483	0.66386	-1.03454	-0.317473	-1.03423	-0.454446	1.18037	0.422092	1.49074	1.27304	0.61957	-0.032046	-1.68092	-1.81848
	TraesCSU02G250000_ERF_family_protein	0.75067	0.790455	-0.5512	0.259901	-1.13956	0.127902	-1.21804	-0.241114	1.34189	0.140429	1.40888	1.26945	0.500806	-0.342652	-1.53639	-1.56143
	TraesCS6B02G122800_ERF_family_protein	0.743972	0.769494	-0.47571	0.242321	-1.19493	0.178723	-1.10358	-0.268293	1.40878	0.198254	1.34962	1.08911	0.688392	-0.421191	-1.62419	-1.58077
	TraesCS2A02G157800_bHLH_family_protein	0.710388	0.897722	0.392973	1.29694	-0.944377	0.180983	-1.00921	-0.3039	0.80354	-0.325176	1.02893	0.884651	0.681711	-0.797648	-1.80997	-1.68756
	TraesCS2D02G163900_bHLH_family_protein	0.801726	0.6224	0.501133	1.3155	-1.10769	-0.0614026	-0.51713	-0.538955	0.856081	-0.351408	1.33487	1.12264	0.231207	-0.956932	-1.77425	-1.47779
	TraesCS1B02G432700_ERF_family_protein	0.797924	0.792415	0.717629	1.26029	-1.12082	-0.106704	-1.12603	-0.525708	0.650802	-0.132333	1.4088	1.16701	0.0236377	-0.902876	-1.45521	-1.44883
	TraesCSU02G167700_ERF_family_protein	1.02828	1.0249	0.443525	1.13902	-0.983119	0.124801	-0.874247	-0.291021	0.855502	-0.107725	1.16472	0.94697	-0.114489	-1.06203	-1.66231	-1.63278
	TraesCS2A02G204800_ERF_family_protein	0.939814	0.948248	0.497673	1.20565	-1.39559	-0.12217	-1.04165	-0.311929	0.741165	-0.17696	1.33883	1.06217	0.125592	-1.23576	-1.36404	-1.21104
	TraesCS2B02G183300_bHLH_family_protein	0.97644	1.00193	0.715432	1.03499	-0.735065	0.181088	-1.22501	-0.99392	0.708626	-0.122372	1.12999	0.905025	0.196407	-0.44246	-1.70044	-1.63067
	TraesCS5D02G357600_ERF_family_protein	1.01428	0.968126	0.574097	1.20105	-1.3105	0.0430447	-0.979448	-0.308743	0.623505	-0.388743	1.35655	1.06306	-0.0214145	-1.05536	-1.40852	-1.37098
	TraesCS1D02G411300_ERF_family_protein	0.823998	0.824553	0.632436	1.30234	-1.40376	-0.0910422	-1.02624	-0.256012	0.584494	-0.289815	1.46913	1.14601	-0.026729	-1.14064	-1.28917	-1.25956
	TraesCS1A02G403300_ERF_family_protein	0.860966	0.877416	0.694094	1.3128	-1.24096	-0.0337904	-1.07917	-0.318659	0.56561	-0.287282	1.4061	1.12273	-0.0910996	-1.09413	-1.36168	-1.33294
	TraesCS2A02G081300_bHLH_family_protein	0.855679	1.04121	0.408923	1.15275	-0.600782	0.406324	-0.77469	-0.315777	0.889192	-0.171596	0.846516	0.613162	0.50077	-1.06831	-1.88606	-1.89731
	TraesCS5A02G057500_bZIP_family_protein	1.32194	1.15697	0.198142	0.526504	-0.858415	-0.179752	-0.85008	-0.821888	1.49118	0.690616	0.809653	0.73838	-0.227426	-1.01998	-1.42116	-1.55468
	TraesCS5D02G329200_ERF_family_protein	0.836184	0.867776	0.720705	1.36135	-1.17393	0.0415724	-0.984397	-0.363167	0.651398	-0.324677	1.37494	1.11156	-0.264533	-1.18865	-1.36142	-1.3047
	TraesCS2B02G095900_bHLH_family_protein	1.01099	1.0172	0.556048	1.24665	-0.779729	0.353608	-0.835115	-0.212772	0.823236	-0.215742	0.887215	0.685463	0.0737831	-1.00072	-2.02816	-1.58195
	TraesCS6B02G378100_MYB_related_family_protein	0.733879	0.56954	0.607729	0.881719	-0.470787	0.416423	-1.47282	-1.29442	1.21141	0.403254	0.982892	0.901202	0.184883	-0.475949	-1.709	-1.46994
	TraesCS2A02G366100_DBB_family_protein	0.772148	0.917024	0.740067	1.18534	-0.427181	0.443337	-1.63095	-0.612511	0.626842	0.13929	1.0421	0.603072	0.243401	-0.622391	-1.56749	-1.8521
	TraesCS2A02G348900_DBB_family_protein	0.982257	0.824516	0.126374	0.831437	-0.403007	0.760833	-1.54761	-0.891878	0.841491	-0.210696	1.12373	0.548299	0.69337	-0.264104	-1.61089	-1.80413
	TraesCS6D02G088600_ERF_family_protein	0.284671	0.42561	-0.252544	0.478668	-0.807339	0.534833	-1.02751	-0.440086	1.13647	0.0293032	1.29973	1.13988	0.968483	-0.0230768	-1.96779	-1.7793
	TraesCS3A02G489600_bHLH_family_protein	0.191231	0.107738	0.498952	0.847164	-0.630417	0.486277	-0.25495	0.148602	1.36932	-0.0395919	1.12212	1.09759	0.111483	-1.25055	-2.13549	-1.66947
	TraesCS3D02G495400_bHLH_family_protein	0.362646	0.36435	0.458797	1.13598	-0.503112	0.733415	-0.394339	0.232765	0.960532	-0.166897	0.863932	0.587928	0.487757	-0.813289	-2.18798	-2.12249
	TraesCS5A02G489500_bHLH_family_protein	1.13139	1.29424	0.557479	1.12132	-0.198644	0.461213	-1.19301	-0.878725	0.582638	0.013999	0.734037	0.434445	0.220674	-0.711592	-1.91951	-1.64996
	TraesCS2B02G367300_DBB_family_protein	0.971609	0.873016	-0.295879	0.60087	-0.498344	0.863042	-1.58767	-0.255198	0.737773	-0.591879	1.10347	0.696061	1.11215	-0.529749	-1.73051	-1.46877
	TraesCS2D02G079100_bHLH_family_protein	1.33654	1.29803	0.428626	1.18093	-1.00375	-0.102758	-0.78591	-0.1667	0.980884	-0.0140634	0.745856	0.54576	-0.0710616	-1.28649	-1.69948	-1.3864
	TraesCS3A02G489700_bHLH_family_protein	0.163621	0.0331921	0.224402	0.936108	-0.510761	0.804505	-0.388172	0.162693	1.10766	-0.123657	1.17338	0.844936	0.554647	-0.875571	-2.29782	-1.80916
	TraesCS3B02G549800_bHLH_family_protein	0.440581	0.265408	0.325648	1.03943	-0.35213	0.941324	-0.476297	0.156836	0.920136	-0.400043	0.804809	0.639136	0.73902	-0.840389	-2.36398	-1.83949
	TraesCS4A02G027700_HSF_family_protein	0.785377	0.858669	-0.270191	0.369668	-0.339907	0.70093	-1.28695	-1.31279	1.57882	0.702135	0.71439	0.571081	0.58319	-0.481175	-1.48371	-1.68954
	TraesCS7A02G299400_MYB_related_family_protein	0.681328	0.568209	-0.214903	0.785876	-0.61652	1.15362	-0.464388	0.204456	0.845412	-0.826158	0.994244	0.838239	0.79467	-1.09847	-1.8896	-1.75602
	TraesCS3A02G489500_bHLH_family_protein	0.0526764	0.104222	0.224963	0.816312	-0.390704	1.09891	-0.650018	0.0276075	1.12747	-0.0264059	0.75833	0.667965	0.841866	-0.324258	-2.09731	-2.23162
	TraesCS5A02G558500_bHLH_family_protein	1.48734	1.29528	0.22249	1.03416	-0.510404	0.413332	-1.52832	-0.862231	0.849996	-0.320429	0.346797	0.389273	0.760882	-0.74081	-1.07922	-1.75815
	TraesCS5D02G393200_HSF_family_protein	0.534888	0.437235	0.702739	0.967584	0.181788	0.741253	-1.16252	-1.03233	0.350161	-0.281628	1.04232	0.874466	0.577966	-0.0754231	-1.5713	-2.28719
	TraesCS5D02G068800_bZIP_family_protein	1.52644	1.32822	-0.131099	0.569508	-0.94708	-0.363159	-0.906938	-0.326375	1.5872	0.66089	0.418306	0.570011	-0.0650301	-1.40543	-1.19746	-1.31801
	TraesCS5B02G059200_bZIP_family_protein	1.31268	1.51899	-0.186478	0.249119	-1.30553	-0.255928	-1.04528	-0.288313	1.78684	0.846025	0.427143	0.413772	-0.184129	-1.03792	-1.22612	-1.02486
	TraesCS4D02G276500_HSF_family_protein	0.869072	0.465665	-0.219454	0.389004	0.478859	1.48632	-0.695487	-0.23495	0.629852	-0.468036	0.18479	0.101413	1.18116	0.0235269	-2.16602	-2.02571
	TraesCS4B02G397400_bHLH_family_protein	0.836658	0.654941	0.217586	0.645183	0.811207	1.64756	-0.399824	-0.123794	0.175097	-0.437702	0.505297	0.218647	0.16382	-0.730918	-2.19526	-1.9885
	TraesCS3D02G495700_bHLH_family_protein	-0.262919	-0.31934	0.332239	0.998072	-0.170391	1.15521	-0.383343	0.0983989	0.921054	-0.370035	0.983892	0.829985	0.821148	-0.471449	-2.09079	-2.07173
	TraesCS7B02G074900_bHLH_family_protein	-0.081276	-0.0240305	1.37184	1.85093	-0.633436	0.0986611	-1.3612	0.522051	0.00638823	-0.952807	1.26752	1.22336	-0.286241	-1.14962	-1.02269	-0.829455
	TraesCS5A02G083100_MYB_related_family_protein	1.80963	1.78835	-0.0517554	0.593722	-1.75542	-0.725911	-0.537504	0.292227	1.01368	-0.0639863	0.296802	0.316909	-0.0354066	-1.12411	-1.07122	-0.746013
	TraesCS4A02G027800_HSF_family_protein	-0.213002	-0.168044	0.338417	1.24538	-1.56901	0.183501	0.762101	1.57559	1.00098	-0.707889	0.614096	0.0240642	0.801496	-1.26171	-1.57683	-1.04914
	TraesCS2B02G543800_bHLH_family_protein	0.308415	-0.836009	-0.224317	0.697353	-0.0155683	1.31141	-0.622385	1.47711	0.997759	-1.85195	0.837817	0.719172	0.438881	-1.00019	-0.978153	-1.25935
	TraesCS4B02G278100_HSF_family_protein	0.888888	0.820796	-0.437375	0.264478	0.511768	1.77539	-1.10363	-0.224281	0.540163	-0.360998	-0.144908	-0.590457	1.5158	-0.186314	-1.88403	-1.3853
DEGs cluster 6 in Fig 6B	TraesCS1B02G055200_MYB_family_protein	-0.834345	-1.08034	-1.58416	-1.32422	-1.31102	-1.19464	0.469447	0.689264	0.900458	0.451726	0.837366	0.864953	0.763018	0.483858	0.880308	0.988319
	TraesCS1B02G059100_ERF_family_protein	-0.860615	-0.809813	-1.1303	-0.581511	-1.77458	-0.737572	-0.789111	-0.120951	1.17102	0.259465	1.44211	1.22922	1.44623	0.371735	0.383308	0.501366
	TraesCS1D02G002900_ERF_family_protein	-1.43095	-1.43095	-0.116757	0.15026	-1.43095	-1.43095	-0.22081	0.0324051	1.46693	0.983236	1.0119	0.840735	1.16498	0.652839	0.0543114	-0.296219
	TraesCS1B02G118900_MYB_related_family_protein	-0.859347	-1.11914	-0.134243	0.767293	-2.06885	-1.01827	-0.64286	0.353944	1.28069	-0.150011	1.1322	1.16988	1.39761	-0.423223	-0.00366155	0.317987
	TraesCS1B02G088900_WRKY_family_protein	-1.71107	-1.76659	-1.22551	-0.905905	-0.437466	-0.336808	0.757823	1.27066	0.333008	0.0123806	-0.119593	0.48868	1.47171	0.878237	0.669477	0.620964
