# Supplementary material for: Identification and transcriptomic profiling of salinity stress response genes in colored wheat mutant
Source: PeerJ. 2024 Mar 6;12:e17043. doi: 10.7717/peerj.17043 (PMC10924784; doi:10.7717/peerj.17043)
Supplement: Supplemental Information 11 [file peerj-12-17043-s011.xlsx]

## Sheet: Sheet1
Supplementary data 1. Raw Data for Figures 1, 2, 7, and 8
Supplementary data 1-1. Raw data for Figure 1D														(cm)
	Concentration of salt treatment(mM)	Sample name	Rep. 1	Rep. 2	Rep. 3	Rep. 4	Rep. 5	Rep. 6	Rep. 7	Rep. 8	Rep. 9	Rep. 10	Average	Standard Error
Shoot	control	PL1	11	12.2	11.1	11.6	11.2	11.1	11.3	10.4	11.3	11.3	11.25	0.144
	control	PL6	12.5	13.5	13.9	14.1	14.2	14.3	13.6	12.8	15	13.8	13.77	0.23
	50	PL1	9	9.1	8.9	9	8.7	8.2	8.3	8.9	8.7	9	8.78	0.098
	50	PL6	14	14.5	13.5	14.2	14.1	13.7	13.9	13.2	12.9	12.7	13.67	0.186
	100	PL1	6.5	6.8	7	6	5.8	6	5.3	6.2	4.8	6.5	6.09	0.213
	100	PL6	9.8	10.2	10.1	9.4	10.2	9.6	9.5	9.3	9.2	9.6	9.69	0.117
	150	PL1	4.2	4.2	4.2	5.1	3.6	4.6	4.5	4.8	4.6	4.7	4.45	0.132
	150	PL6	7.2	6.7	7.2	6.8	6.3	6.5	7.2	6.3	6.1	6.1	6.64	0.146
	200	PL1	2.5	2.6	2.2	3.1	2.1	1.6	2.3	3.3	1.6	1.2	2.25	0.21
	200	PL6	4	3.8	4.1	4.2	4.1	3.2	3.4	3.5	3.7	3.3	3.73	0.116
	250	PL1	2.5	1.2	1.7	1	0.7	0.6	0.4	0.4	0.3	0.3	0.91	0.228
	250	PL6	2.3	1.8	2.1	2.5	2	1.8	2.1	2	1.9	1.5	2	0.089
Root	control	PL1	8.2	9.4	8.1	7.2	8.3	7.3	7.8	7.5	7.6	7.4	7.88	0.20806
	control	PL6	10.1	7.2	9.3	10.2	9.3	9.6	10.1	6.7	8.6	8.2	8.93	0.389886
	50	PL1	5	5.1	5.1	8.1	5.2	5.3	7	6.2	6.9	6.7	6.06	0.340979
	50	PL6	7.9	8.9	7	7.1	8	7.5	8.1	7.3	7.5	7.2	7.65	0.183938
	100	PL1	3.5	3.4	4.2	3.3	3.6	3.3	3.5	4.1	3.2	4.2	3.63	0.122972
	100	PL6	5.2	5	5	5.2	4.9	5.2	4.5	4.1	5.2	5.1	4.94	0.115662
	150	PL1	2.8	3.1	2.5	2.9	2.1	2.8	2.4	2.6	2.5	2.6	2.63	0.089505
	150	PL6	3.5	3.8	4.2	4.1	3.5	3.7	3.9	3	3.3	3.5	3.65	0.11571
	200	PL1	1.9	2.1	1.7	2.8	1.7	1.7	1.7	2.1	1.9	1.6	1.92	0.112349
	200	PL6	2.2	2.5	2.4	2.7	2.1	2.4	2.6	2.5	2.1	2.6	2.41	0.067412
	250	PL1	0.7	0.4	0.7	0.6	0.5	0.7	0.7	1.2	0.5	0.8	0.68	0.069602
	250	PL6	2.2	0.9	1.2	1.5	1.1	1.6	1.7	1.3	1	1.2	1.37	0.122972
Supplementary data 1-2. Raw data for Figure 2A-2B
	Times	Sample name	Rep. 1	Rep. 2	Average	Standard Error
Na+	0h	PL1	300.898	294.449	297.673	2.28007
	0h	PL6	537.652	529.557	533.605	2.86201
	3h	PL1	971.65	971.68	971.665	0.0106066
	3h	PL6	970.813	990.964	980.889	7.12445
	24h	PL1	9037.18	8932.49	8984.84	37.0135
	24h	PL6	6713.27	6757.04	6735.15	15.4729
	48h	PL1	13974.7	14163.4	14069.1	66.718
	48h	PL6	10980.5	10989.8	10985.2	3.3082
K+	0h	PL1	18612.4	18077.5	18345	189.133
	0h	PL6	13278.7	13603.5	13441.1	114.845
	3h	PL1	17513.8	16989.3	17251.5	185.413
	3h	PL6	11577.6	11627.3	11602.5	17.5638
	24h	PL1	15972	16039.2	16005.6	23.7393
	24h	PL6	11455.8	11401	11428.4	19.385
	48h	PL1	13636.6	13773.3	13705	48.3049
	48h	PL6	10477.9	10518.2	10498.1	14.257
Supplementary data 1-3. Raw data for Figure 2E
	Times	Sample name	Rep. 1	Rep. 2	Rep. 3	Rep. 4	Average	Standard Error
chlorophyll a	0h	PL1	3.77309	3.53812	3.54467	3.62611	3.6205	1.45525
	0h	PL6	3.1964	3.18474	3.20131	3.19588	3.19458	0.00350181
	3h	PL1	4.27283	4.15058	3.74068	3.73802	3.97553	1.60502
	3h	PL6	3.67138	4.64533	3.66853	4.52586	4.12778	0.265445
	24h	PL1	3.53292	3.32681	3.53926	3.23196	3.40774	1.44239
	24h	PL6	3.54079	3.91157	3.89265	3.6562	3.7503	0.090839
	48h	PL1	3.8901	3.93658	3.87272	4.08439	3.94595	1.64762
	48h	PL6	3.63963	3.92416	3.95789	3.69625	3.80448	0.0799721
chlorophyll b	0h	PL1	1.59188	1.36578	1.455	1.40835	1.45525	0.0490513
	0h	PL6	1.40354	1.32233	1.42004	1.308	1.36348	0.0282475
	3h	PL1	1.80279	1.65485	1.48989	1.47255	1.60502	0.0776747
	3h	PL6	1.44443	1.95114	1.49642	1.8755	1.69187	0.12922
	24h	PL1	1.43086	1.46696	1.49979	1.37195	1.44239	0.0273758
	24h	PL6	1.47274	1.67266	1.61045	1.65786	1.60343	0.0455377
	48h	PL1	1.64807	1.55945	1.60363	1.77934	1.64762	0.047487
	48h	PL6	1.60496	1.82277	1.83261	1.647	1.72684	0.0588909
Total chlorophyll	0h	PL1	5.21777	4.7721	4.86337	4.89896	4.93805	0.0969913
	0h	PL6	4.47254	4.38387	4.49305	4.38117	4.43266	0.0292529
	3h	PL1	5.90892	5.64824	5.08897	5.06987	5.429	0.208764
	3h	PL6	4.97771	6.41568	5.02435	6.22646	5.66105	0.383133
	24h	PL1	4.82888	4.66087	4.90066	4.47741	4.71695	0.0943404
	24h	PL6	4.87643	5.43053	5.35281	5.16576	5.20638	0.12322
	48h	PL1	5.38607	5.34743	5.32675	5.70163	5.44047	0.0879162
	48h	PL6	5.0992	5.58564	5.6281	5.19475	5.37692	0.134464
Supplementary data 1-4. Raw data for Figure 7
	Times	Sample name	Rep. 1	Rep. 2	Rep. 3	Average	Standard Error
Catalase	0h	PL1	1.24805	1.63117	2.0389	1.63937	0.228337
	3h	PL1	1.58183	1.69793	1.8	1.69325	0.0630238
	24h	PL1	1.35254	1.51507	1.80416	1.55726	0.132068
	48h	PL1	1.11454	1.19	2.3273	1.54395	0.392283
	0h	PL6	1.25966	1.57893	1.52247	1.45369	0.0983729
	3h	PL6	1.30195	1.35171	2.12705	1.59357	0.267128
	24h	PL6	2.00602	1.88341	2.52869	2.13937	0.19785
	48h	PL6	2.1478	1.81886	2.16857	2.04508	0.113268
Peroxide	0h	PL1	7.3	10.4	14.4	10.7	2.05508
	3h	PL1	9.8	11.84	14.44	12.0267	1.3427
	24h	PL1	9.2	15.3333	17.4667	14	2.47775
	48h	PL1	9.66667	17.5	19.1667	15.4444	2.92868
	0h	PL6	11.2	14.4	15.8	13.8	1.36137
	3h	PL6	12.8889	15.7037	21.6296	16.7407	2.57596
	24h	PL6	17.8667	25.6	26.2	23.2222	2.68337
	48h	PL6	18	23.2353	26.3529	22.5294	2.43698
Total supoeroxide dismutase	0h	PL1	1.28849	1.24191	1.26054	1.26365	0.0135335
	3h	PL1	1.26732	1.27014	1.24756	1.26167	0.00710322
	24h	PL1	1.16782	1.2031	1.17135	1.18076	0.0112189
	48h	PL1	1.21777	1.21432	1.17292	1.20167	0.0144085
	0h	PL6	1.25607	1.28091	1.20155	1.25951	0.0234352
	3h	PL6	1.28579	1.29929	1.28916	1.29141	0.00405597
	24h	PL6	1.29502	1.2746	1.25149	1.2737	0.0125753
	48h	PL6	1.30401	1.29514	1.28849	1.29588	0.00449659
Total antioxidant activity	0h	PL1	3.28581	3.53543	3.44484	3.42203	0.0729552
	3h	PL1	3.52911	3.29822	3.59775	3.47503	0.0905954
	24h	PL1	2.87924	3.20318	3.22667	3.10303	0.1121
	48h	PL1	2.86391	3.21595	3.24614	3.10867	0.12269
	0h	PL6	3.3015	3.74034	3.61734	3.55306	0.130695
	3h	PL6	3.0402	3.34254	3.36345	3.24873	0.104439
	24h	PL6	3.88542	4.03851	4.60204	4.17533	0.217888
	48h	PL6	3.68132	4.58889	4.21392	4.16137	0.263308
Supplementary data 1-5. Raw data for Figure 8
TRAESCS1B02095800
Well	Sample	Target-Cq	Actin-Cq	delta cq	average delta cq	delta delta cq	2^dd cq	log2 expression	aveage log2	standard error
A01	PL1 0h	25.3359	25.1844	0.151455	-0.022226	-11.0485	2118.09	11.0485	11.2222	0.0868846
A02	PL1 0h	25.197	25.3013	-0.104267		-11.3043	2528.85	11.3043
A03	PL1 0h	25.204	25.3179	-0.113866		-11.3139	2545.73	11.3139
B01	PL1 3h	25.1264	25.4653	-0.338897	-0.28476	-14.4389	22209.6	14.4389	14.3848	0.0561405
B02	PL1 3h	25.157	25.4999	-0.342881		-14.4429	22271	14.4429
B03	PL1 3h	25.249	25.4215	-0.172502		-14.2725	19790.3	14.2725
C01	PL1 24h	25.1455	24.7822	0.363317	0.351891	-3.23668	9.42625	3.23668	3.24811	0.0109732
C02	PL1 24h	25.1565	24.8266	0.329951		-3.27005	9.64679	3.27005
C03	PL1 24h	25.2374	24.875	0.362406		-3.23759	9.4322	3.23759
D01	PL1 48h	25.1241	25.5353	-0.411209	-0.42094	-4.51121	22.8039	4.51121	4.52094	0.06349
D02	PL1 48h	25.1498	25.4659	-0.316161		-4.41616	21.35	4.41616
D03	PL1 48h	25.1162	25.6517	-0.53545		-4.63545	24.8548	4.63545
E01	PL6 0h	24.1034	25.4164	-1.31299		-12.513	5845.02	12.513	12.5773	0.111234
E02	PL6 0h	24.1276	25.3526	-1.22494		-12.4249	5498.94	12.4249
E03	PL6 0h	24.113	25.7068	-1.59384		-12.7938	7101.15	12.7938
F01	PL6 3h	24.8655	25.9596	-1.09408		-15.1941	37486.5	15.1941	15.1831	0.00717933
F02	PL6 3h	24.8472	25.9168	-1.06959		-15.1696	36855.3	15.1696
F03	PL6 3h	24.9165	26.002	-1.08554		-15.1855	37265.2	15.1855
G01	PL6 24h	24.3483	25.1958	-0.84754		-4.44754	21.8194	4.44754	4.51598	0.0370704
G02	PL6 24h	24.3354	25.2609	-0.925518		-4.52552	23.0312	4.52552
G03	PL6 24h	24.3193	25.2942	-0.974889		-4.57489	23.833	4.57489
H01	PL6 48h	24.3207	26.0669	-1.7462		-5.8462	57.5282	5.8462	5.80587	0.0352166
H02	PL6 48h	24.3584	25.9941	-1.6357		-5.7357	53.2864	5.7357
H03	PL6 48h	24.315	26.0507	-1.73572		-5.83572	57.1117	5.83572
TRAESCS1B02G038700
A01	PL1 0h	33.0923	25.3687	7.72359	7.6879	0.0356833	0.97557	-0.0356833	3.9783e-16	0.14444
A02	PL1 0h	32.756	25.3342	7.4218		-0.266104	1.20256	0.266104
A03	PL1 0h	33.3232	25.4049	7.91832		0.23042	0.852387	-0.23042
B01	PL1 3h	33.2832	25.5926	7.6906	6.8516	0.839006	0.559029	-0.839006	0	0.433026
B02	PL1 3h	31.8992	25.6531	6.24612		-0.605475	1.52148	0.605475
B03	PL1 3h	32.2183	25.6002	6.61807		-0.233531	1.17571	0.233531
C01	PL1 24h	32.0899	25.0308	7.0591	7.23363	-0.174531	1.1286	0.174531	-2.84495e-16	0.0970448
C02	PL1 24h	32.3967	25.0023	7.39443		0.160799	0.894529	-0.160799
C03	PL1 24h	32.3502	25.1028	7.24736		0.0137319	0.990527	-0.0137319
D01	PL1 48h	33.1357	25.6818	7.45387	7.0563	0.397574	0.759134	-0.397574	0	0.44007
D02	PL1 48h	33.1934	25.6559	7.53754		0.481238	0.716362	-0.481238
D03	PL1 48h	31.7874	25.6099	6.17749		-0.878813	1.83886	0.878813
E01	PL6 0h	30.9587	25.4452	5.51352		-2.17438	4.51392	2.17438	2.25876	0.0473423
E02	PL6 0h	30.8026	25.4528	5.34975		-2.33815	5.05654	2.33815
E03	PL6 0h	31.1594	25.7353	5.42415		-2.26375	4.8024	2.26375
F01	PL6 3h	31.7854	26.059	5.72634		-1.12525	2.1814	1.12525	1.10998	0.15352
F02	PL6 3h	32.0422	26.0274	6.01483		-0.836763	1.78604	0.836763
F03	PL6 3h	31.5254	26.0417	5.48369		-1.36791	2.58097	1.36791
G01	PL6 24h	30.7293	25.373	5.35629		-1.87734	3.67398	1.87734	1.73239	0.10837
G02	PL6 24h	31.0897	25.3765	5.71326		-1.52037	2.86864	1.52037
G03	PL6 24h	30.9774	25.5432	5.43416		-1.79947	3.48092	1.79947
H01	PL6 48h	30.0981	26.2219	3.87617		-3.18013	9.06387	3.18013	1.7646	0.72411
H02	PL6 48h	32.4489	26.1844	6.26444		-0.791856	1.7313	0.791856
H03	PL6 48h	31.8884	26.1539	5.73449		-1.32181	2.4998	1.32181
TRAESCS1B02g138100
A07	PL1 0h	28.8457	25.4632	3.38247	3.42578	-0.0433035	1.03047	0.0433035	4.62593e-17	0.0318432
A08	PL1 0h	28.8927	25.4857	3.40699		-0.0187904	1.01311	0.0187904
A09	PL1 0h	29.0041	25.5163	3.48787		0.0620939	0.957873	-0.0620939
B07	PL1 3h	27.4765	25.6807	1.7958	1.79582	-2.46583e-05	1.00002	2.46583e-05	-7.40149e-17	0.0458838
B08	PL1 3h	27.4993	25.624	1.87531		0.0794854	0.946395	-0.0794854
B09	PL1 3h	27.4847	25.7683	1.71636		-0.0794607	1.05662	0.0794607
C07	PL1 24h	28.5482	25.035	3.51327	3.5247	-0.0114326	1.00796	0.0114326	0	0.0142301
C08	PL1 24h	28.5614	25.0535	3.50785		-0.016855	1.01175	0.016855
C09	PL1 24h	28.6514	25.0984	3.55299		0.0282876	0.980584	-0.0282876
D07	PL1 48h	27.1865	25.5935	1.59298	1.63277	-0.0397882	1.02796	0.0397882	1.43404e-16	0.0838646
D08	PL1 48h	27.3882	25.5944	1.79378		0.161006	0.894401	-0.161006
D09	PL1 48h	27.2293	25.7177	1.51155		-0.121217	1.08765	0.121217
E07	PL6 0h	25.6432	25.5113	0.131865		-3.29391	9.80768	3.29391	3.36194	0.0340603
E08	PL6 0h	25.6822	25.6492	0.0329424		-3.39283	10.5038	3.39283
E09	PL6 0h	25.7231	25.6964	0.0267116		-3.39906	10.5492	3.39906
F07	PL6 3h	26.0099	26.0979	-0.0879618		-1.88378	3.69042	1.88378	1.98364	0.0586934
F08	PL6 3h	25.8221	26.1133	-0.29119		-2.08701	4.24867	2.08701
F09	PL6 3h	25.9267	26.1109	-0.184286		-1.98011	3.94523	1.98011
G07	PL6 24h	25.9066	25.4881	0.418477		-3.10622	8.61126	3.10622	3.20046	0.0857976
G08	PL6 24h	25.859	25.4577	0.401306		-3.12339	8.71436	3.12339
G09	PL6 24h	25.7376	25.5847	0.152928		-3.37177	10.3515	3.37177
H07	PL6 48h	25.159	26.2994	-1.14047		-2.77324	6.83642	2.77324	2.64525	0.0801801
H08	PL6 48h	25.2872	26.3194	-1.03215		-2.66492	6.34192	2.66492
H09	PL6 48h	25.3072	26.172	-0.864816		-2.49759	5.6474	2.49759
TRAESCS2A02G102200
A01	PL1 0h	28.3709	25.4632	2.90765	2.89138	0.0162727	0.988784	-0.0162727	-1.43404e-16	0.0513948
A02	PL1 0h	28.4568	25.4857	2.97114		0.0797594	0.946215	-0.0797594
A03	PL1 0h	28.3116	25.5163	2.79535		-0.0960321	1.06883	0.0960321
B01	PL1 3h	28.3915	25.6807	2.71073	2.79124	-0.0805079	1.05739	0.0805079	2.16262e-16	0.0520075
B02	PL1 3h	28.5125	25.624	2.88853		0.0972908	0.934787	-0.0972908
B03	PL1 3h	28.5428	25.7683	2.77445		-0.016783	1.0117	0.016783
C01	PL1 24h	28.2631	25.035	3.22813	3.33787	-0.10974	1.07903	0.10974	-9.02056e-17	0.0771973
C02	PL1 24h	28.5403	25.0535	3.4868		0.148924	0.901923	-0.148924
C03	PL1 24h	28.3971	25.0984	3.29869		-0.0391842	1.02753	0.0391842
D01	PL1 48h	28.4047	25.5935	2.81121	2.88482	-0.073612	1.05235	0.073612	-1.34152e-16	0.036851
D02	PL1 48h	28.5192	25.5944	2.92478		0.0399576	0.972684	-0.0399576
D03	PL1 48h	28.6362	25.7177	2.91848		0.0336545	0.976942	-0.0336545
E01	PL6 0h	28.0849	25.5113	2.5736		-0.317779	1.24641	0.317779	0.372667	0.0727014
E02	PL6 0h	28.2571	25.6492	2.60788		-0.283506	1.21715	0.283506
E03	PL6 0h	28.0711	25.6964	2.37466		-0.516718	1.4307	0.516718
F01	PL6 3h	28.5952	26.0979	2.49735		-0.293885	1.22594	0.293885	0.27702	0.0139099
F02	PL6 3h	28.6551	26.1133	2.54181		-0.249426	1.18873	0.249426
F03	PL6 3h	28.6144	26.1109	2.50349		-0.287748	1.22073	0.287748
G01	PL6 24h	28.4475	25.4881	2.95938		-0.378494	1.29998	0.378494	0.508358	0.114982
G02	PL6 24h	28.3866	25.4577	2.92894		-0.408929	1.3277	0.408929
G03	PL6 24h	28.1849	25.5847	2.60022		-0.73765	1.66746	0.73765
H01	PL6 48h	28.3771	26.2994	2.07764		-0.807184	1.74979	0.807184	1.06414	0.197787
H02	PL6 48h	28.272	26.3194	1.95267		-0.932154	1.90812	0.932154
H03	PL6 48h	27.6037	26.172	1.43175		-1.45308	2.73791	1.45308
TRAESCS2A02G046200
A07	PL1 0h	29.4917	24.9807	4.51098	7.97847	-3.46748	11.0616	3.46748	0	2.23044
A08	PL1 0h	32.3012	25.0194	7.28179		-0.696679	1.62077	0.696679
A09	PL1 0h	37.5439	25.4013	12.1426		4.16416	0.0557778	-4.16416
B07	PL1 3h	28.7526	25.1695	3.58311	3.48584	0.0972632	0.934805	-0.0972632	-1.75785e-16	0.0625301
B08	PL1 3h	28.6551	25.1498	3.50529		0.0194488	0.98661	-0.0194488
B09	PL1 3h	28.5816	25.2124	3.36913		-0.116712	1.08426	0.116712
C07	PL1 24h	32.9238	24.1836	8.74027	10.0378	-1.29757	2.45814	1.29757	-6.66134e-16	0.777377
C08	PL1 24h	34.123	24.1782	9.94488		-0.0929581	1.06655	0.0929581
C09	PL1 24h	35.7515	24.3231	11.4284		1.39053	0.381426	-1.39053
D07	PL1 48h	32.9306	25.0317	7.89889	8.65296	-0.754072	1.68655	0.754072	-6.66134e-16	0.861351
D08	PL1 48h	32.7243	25.0357	7.68861		-0.964347	1.95118	0.964347
D09	PL1 48h	35.5142	25.1428	10.3714		1.71842	0.303882	-1.71842
E07	PL6 0h	25.5916	25.0398	0.551826		-7.42664	172.045	7.42664	7.38415	0.0967575
E08	PL6 0h	25.7912	25.0121	0.779068		-7.1994	146.972	7.1994
E09	PL6 0h	25.7832	25.3312	0.452071		-7.5264	184.362	7.5264
F07	PL6 3h	26.2741	25.4236	0.850485		-2.63536	6.21329	2.63536	2.65511	0.0268276
F08	PL6 3h	26.125	25.3474	0.777649		-2.70819	6.53503	2.70819
F09	PL6 3h	26.1594	25.2954	0.864054		-2.62179	6.15512	2.62179
G07	PL6 24h	26.0162	24.7087	1.30759		-8.73025	424.686	8.73025	8.76173	0.0724199
G08	PL6 24h	25.9929	24.6101	1.38281		-8.65503	403.111	8.65503
G09	PL6 24h	25.8069	24.669	1.13793		-8.89991	477.682	8.89991
H07	PL6 48h	26.0852	25.4363	0.648881		-8.00408	256.724	8.00408	8.20045	0.0982023
H08	PL6 48h	26.0174	25.6601	0.357287		-8.29567	314.229	8.29567
H09	PL6 48h	25.9815	25.6302	0.351351		-8.30161	315.524	8.30161
TRAESCS1B02G048900
A07	PL1 0h	28.7578	25.3298	3.42796	3.40196	0.0259998	0.98214	-0.0259998	2.02384e-17	0.0132599
A08	PL1 0h	28.9543	25.5699	3.38444		-0.0175251	1.01222	0.0175251
A09	PL1 0h	28.9541	25.5606	3.39349		-0.00847476	1.00589	0.00847476
B07	PL1 3h	28.576	25.4884	3.08763	3.1184	-0.0307705	1.02156	0.0307705	0	0.0718999
B08	PL1 3h	28.6948	25.4394	3.25543		0.137035	0.909386	-0.137035
B09	PL1 3h	28.5652	25.553	3.01214		-0.106265	1.07644	0.106265
C07	PL1 24h	29.0152	24.6151	4.40011	4.42537	-0.0252616	1.01766	0.0252616	1.11022e-16	0.0406037
C08	PL1 24h	29.0723	24.7011	4.37116		-0.0542077	1.03829	0.0542077
C09	PL1 24h	29.3083	24.8034	4.50484		0.0794693	0.946406	-0.0794693
D07	PL1 48h	28.8316	25.2255	3.60608	3.50218	0.103896	0.930517	-0.103896	-1.52656e-16	0.0539104
D08	PL1 48h	28.8853	25.4101	3.4752		-0.0269824	1.01888	0.0269824
D09	PL1 48h	28.967	25.5418	3.42527		-0.0769132	1.05476	0.0769132
E07	PL6 0h	27.5548	25.3282	2.22657		-1.17539	2.25854	1.17539	1.26529	0.112112
E08	PL6 0h	27.5899	25.3203	2.26961		-1.13235	2.19215	1.13235
E09	PL6 0h	27.5017	25.5879	1.91383		-1.48813	2.80526	1.48813
F07	PL6 3h	27.9198	25.6624	2.25744		-0.860959	1.81625	0.860959	0.599877	0.183397
F08	PL6 3h	28.3654	25.4932	2.87218		-0.24622	1.1861	0.24622
F09	PL6 3h	28.1495	25.7236	2.42595		-0.692452	1.61603	0.692452
G07	PL6 24h	27.5814	25.2645	2.3169		-2.10847	4.31233	2.10847	1.95039	0.0905744
G08	PL6 24h	27.6446	25.1672	2.47742		-1.94795	3.85826	1.94795
G09	PL6 24h	27.8645	25.2338	2.63063		-1.79474	3.46952	1.79474
H07	PL6 48h	28.1934	26.0403	2.15306		-1.34912	2.54756	1.34912	1.51463	0.0841231
H08	PL6 48h	28.0502	26.1192	1.93097		-1.57121	2.97153	1.57121
H09	PL6 48h	28.0645	26.1859	1.87863		-1.62355	3.08133	1.62355
TRAESCS1B02G071800
A07	PL1 0h	36.3431	25.2458	11.0973	10.5883	0.508979	0.70272	-0.508979	-5.92119e-16	0.461014
A08	PL1 0h	36.2427	25.243	10.9997		0.411324	0.751933	-0.411324
A09	PL1 0h	34.9928	25.3247	9.66804		-0.920303	1.89251	0.920303
B07	PL1 3h	36.5226	25.4509	11.0717	10.2446	0.827094	0.563664	-0.827094	0	1.10178
B08	PL1 3h	37.1449	25.545	11.5999		1.35527	0.390862	-1.35527
B09	PL1 3h	33.7313	25.669	8.06227		-2.18236	4.53896	2.18236
C07	PL1 24h	35.9502	24.5615	11.3888	9.81204	1.57672	0.335243	-1.57672	0	1.22248
C08	PL1 24h	35.6389	24.9969	10.642		0.829911	0.562564	-0.829911
C09	PL1 24h	32.4306	25.0252	7.40541		-2.40663	5.30235	2.40663
D07	PL1 48h	30.0219	25.5912	4.43068	4.35906	0.0716126	0.951574	-0.0716126	-2.77556e-16	0.211415
D08	PL1 48h	30.207	25.5228	4.68415		0.325085	0.798251	-0.325085
D09	PL1 48h	29.5737	25.6113	3.96237		-0.396697	1.31649	0.396697
E07	PL6 0h	27.4699	25.3659	2.10402		-8.48433	358.127	8.48433	8.63532	0.117991
E08	PL6 0h	27.487	25.4524	2.03458		-8.55377	375.787	8.55377
E09	PL6 0h	27.4328	25.7124	1.72047		-8.86787	467.193	8.86787
F07	PL6 3h	28.4268	26.1084	2.31833		-7.9263	243.251	7.9263	7.91535	0.0292223
F08	PL6 3h	28.4186	26.0341	2.38448		-7.86016	232.35	7.86016
F09	PL6 3h	28.3031	26.0181	2.28504		-7.95959	248.929	7.95959
G07	PL6 24h	27.9885	25.2727	2.71579		-7.09625	136.831	7.09625	7.01085	0.0431172
G08	PL6 24h	28.0816	25.2481	2.83352		-6.97852	126.108	6.97852
G09	PL6 24h	28.1352	25.2809	2.85426		-6.95779	124.309	6.95779
H07	PL6 48h	28.4274	26.0937	2.33377		-2.02529	4.07075	2.02529	1.92361	0.053558
H08	PL6 48h	28.5561	26.0406	2.51546		-1.8436	3.58905	1.8436
H09	PL6 48h	28.4955	26.0384	2.45712		-1.90194	3.73716	1.90194
TRAESCS7D02G246600
A04	PL1 0h	28.2646	25.2458	3.0188	2.98992	0.028877	0.980183	-0.028877	-1.11022e-16	0.0583724
A05	PL1 0h	28.1206	25.243	2.87752		-0.112401	1.08103	0.112401
A06	PL1 0h	28.3982	25.3247	3.07344		0.0835238	0.94375	-0.0835238
B04	PL1 3h	29.0763	25.4509	3.62537	3.47346	0.151909	0.900059	-0.151909	1.61908e-16	0.07952
B05	PL1 3h	28.9833	25.545	3.43828		-0.0351733	1.02468	0.0351733
B06	PL1 3h	29.0257	25.669	3.35672		-0.116735	1.08428	0.116735
C04	PL1 24h	28.9334	24.5615	4.37197	4.07183	0.300139	0.812174	-0.300139	-2.40548e-16	0.206267
C05	PL1 24h	29.1638	24.9969	4.16686		0.0950326	0.936251	-0.0950326
C06	PL1 24h	28.7019	25.0252	3.67666		-0.395172	1.3151	0.395172
D04	PL1 48h	28.7101	25.5912	3.11888	3.11344	0.00543692	0.996239	-0.00543692	6.4763e-17	0.0686454
D05	PL1 48h	28.7523	25.5228	3.22953		0.116086	0.922688	-0.116086
D06	PL1 48h	28.6033	25.6113	2.99192		-0.121523	1.08788	0.121523
E04	PL6 0h	27.279	25.3659	1.91309		-1.07683	2.1094	1.07683	1.24663	0.0874619
E05	PL6 0h	27.1472	25.4524	1.69482		-1.2951	2.45393	1.2951
E06	PL6 0h	27.3343	25.7124	1.62197		-1.36795	2.58103	1.36795
F04	PL6 3h	28.0193	26.1084	1.91085		-1.56261	2.95387	1.56261	1.40169	0.105372
F05	PL6 3h	28.0685	26.0341	2.03437		-1.43909	2.7115	1.43909
F06	PL6 3h	28.2882	26.0181	2.27008		-1.20338	2.30278	1.20338
G04	PL6 24h	28.1401	25.2727	2.86736		-1.20447	2.30452	1.20447	1.20624	0.032529
G05	PL6 24h	28.0565	25.2481	2.80838		-1.26345	2.40069	1.26345
G06	PL6 24h	28.2019	25.2809	2.92102		-1.15081	2.22039	1.15081
H04	PL6 48h	27.5703	26.0937	1.47666		-1.63678	3.10972	1.63678	1.63525	0.0160221
H05	PL6 48h	27.4919	26.0406	1.45123		-1.66221	3.165	1.66221
H06	PL6 48h	27.5451	26.0384	1.50667		-1.60677	3.04569	1.60677
TRAESCS6B02G466700
A07	PL1 0h	32.9439	25.4541	7.48981	7.33316	0.156651	0.897105	-0.156651	0	0.24687
A08	PL1 0h	32.2886	25.4392	6.84933		-0.483825	1.39845	0.483825
A09	PL1 0h	33.024	25.3637	7.66033		0.327174	0.797096	-0.327174
B07	PL1 3h	30.1186	25.7886	4.33002	4.23817	0.0918515	0.938318	-0.0918515	1.38778e-17	0.0552683
B08	PL1 3h	29.7828	25.6439	4.13899		-0.0991821	1.07117	0.0991821
B09	PL1 3h	30.0152	25.7697	4.2455		0.00733063	0.994932	-0.00733063
C07	PL1 24h	32.2695	24.9529	7.31655	7.3296	-0.0130506	1.00909	0.0130506	2.96059e-16	0.00986166
C08	PL1 24h	32.29	24.9666	7.32332		-0.00628166	1.00436	0.00628166
C09	PL1 24h	32.2986	24.9496	7.34893		0.0193323	0.986689	-0.0193323
D07	PL1 48h	32.1556	25.5832	6.57238	6.95567	-0.383295	1.30432	0.383295	0	0.344822
D08	PL1 48h	32.1812	25.5304	6.65081		-0.304861	1.2353	0.304861
D09	PL1 48h	33.1628	25.519	7.64383		0.688155	0.620647	-0.688155
E07	PL6 0h	28.3564	25.4845	2.8719		-4.46125	22.0278	4.46125	4.4337	0.0512618
E08	PL6 0h	28.5114	25.5127	2.99876		-4.3344	20.1736	4.3344
E09	PL6 0h	28.4878	25.6601	2.82772		-4.50544	22.7129	4.50544
F07	PL6 3h	27.775	25.9263	1.84874		-2.38943	5.23952	2.38943	2.59511	0.115465
F08	PL6 3h	27.6427	26.0115	1.63116		-2.60701	6.09239	2.60701
F09	PL6 3h	27.4524	26.0031	1.44929		-2.78889	6.91096	2.78889
G07	PL6 24h	27.9919	25.3523	2.63957		-4.69002	25.813	4.69002	4.64298	0.024104
G08	PL6 24h	28.04	25.3208	2.71925		-4.61035	24.426	4.61035
G09	PL6 24h	28.1465	25.4454	2.70104		-4.62856	24.7364	4.62856
H07	PL6 48h	28.6969	26.122	2.57493		-4.38075	20.8322	4.38075	4.26787	0.064171
H08	PL6 48h	28.9581	26.161	2.79714		-4.15854	17.8585	4.15854
H09	PL6 48h	28.9157	26.2244	2.69134		-4.26434	19.2174	4.26434
TRAESCS1B02G105100
A01	PL1 0h	30.111	25.5635	4.54746	4.43012	0.117339	0.921887	-0.117339	0	0.0631458
A02	PL1 0h	29.8256	25.4946	4.331		-0.0991153	1.07112	0.0991153
A03	PL1 0h	30.0214	25.6095	4.41189		-0.0182237	1.01271	0.0182237
B01	PL1 3h	28.5818	25.7592	2.82259	3.21028	-0.387689	1.3083	0.387689	-1.4803e-16	0.195022
B02	PL1 3h	29.2548	25.8136	3.44118		0.230904	0.852101	-0.230904
B03	PL1 3h	29.2106	25.8435	3.36706		0.156784	0.897022	-0.156784
C01	PL1 24h	29.3824	24.9859	4.39648	4.38137	0.0151069	0.989583	-0.0151069	-2.42861e-16	0.0104727
C02	PL1 24h	29.4681	25.0817	4.38638		0.00501116	0.996533	-0.00501116
C03	PL1 24h	29.4725	25.1113	4.36125		-0.0201181	1.01404	0.0201181
D01	PL1 48h	29.1327	25.6048	3.52792	3.58373	-0.0558078	1.03944	0.0558078	8.32667e-17	0.0545487
D02	PL1 48h	29.206	25.6755	3.53045		-0.0532799	1.03762	0.0532799
D03	PL1 48h	29.4562	25.7634	3.69282		0.109088	0.927174	-0.109088
E01	PL6 0h	28.9968	25.6465	3.3503		-1.07982	2.11377	1.07982	1.32327	0.16349
E02	PL6 0h	28.8813	25.7071	3.17415		-1.25597	2.38828	1.25597
E03	PL6 0h	28.8888	26.0927	2.79608		-1.63404	3.1038	1.63404
F01	PL6 3h	29.0672	26.0457	3.0215		-0.188775	1.1398	0.188775	0.194765	0.0376478
F02	PL6 3h	28.864	25.9165	2.94751		-0.262761	1.19977	0.262761
F03	PL6 3h	29.0753	25.9978	3.07752		-0.132759	1.09639	0.132759
G01	PL6 24h	29.0581	25.2557	3.80239		-0.57898	1.49379	0.57898	0.913433	0.167394
G02	PL6 24h	28.5436	25.2558	3.28776		-1.09361	2.13408	1.09361
G03	PL6 24h	28.5516	25.2379	3.31366		-1.06771	2.0961	1.06771
H01	PL6 48h	28.8346	26.2113	2.62328		-0.960449	1.94592	0.960449	1.26787	0.154
H02	PL6 48h	28.4236	26.2779	2.14577		-1.43796	2.70937	1.43796
H03	PL6 48h	28.4696	26.291	2.17854		-1.40519	2.64853	1.40519
TRAESCS6B02G017900
A04	PL1 0h	29.6207	25.6623	3.95839	4.15152	-0.193131	1.14324	0.193131	-2.77556e-16	0.142701
A05	PL1 0h	29.6496	25.5835	4.06611		-0.0854132	1.06099	0.0854132
A06	PL1 0h	30.0748	25.6447	4.43006		0.278544	0.824423	-0.278544
B04	PL1 3h	28.8258	25.6134	3.21246	2.9403	0.272162	0.828078	-0.272162	0	0.146766
B05	PL1 3h	28.7047	25.8053	2.89944		-0.0408596	1.02873	0.0408596
B06	PL1 3h	28.5676	25.8586	2.709		-0.231302	1.17389	0.231302
C04	PL1 24h	28.7486	25.0777	3.67088	3.60913	0.061744	0.958105	-0.061744	-1.85037e-16	0.0481357
C05	PL1 24h	28.6345	24.9923	3.64223		0.033096	0.977321	-0.033096
C06	PL1 24h	28.4762	24.9619	3.51429		-0.09484	1.06795	0.09484
D04	PL1 48h	29.5872	25.7683	3.81889	3.64421	0.174677	0.885966	-0.174677	1.249e-16	0.0873387
D05	PL1 48h	29.277	25.7197	3.55733		-0.0868794	1.06207	0.0868794
D06	PL1 48h	29.4957	25.9392	3.55641		-0.0877972	1.06275	0.0877972
E04	PL6 0h	29.2275	25.7168	3.51072		-0.640803	1.5592	0.640803	0.781239	0.0720659
E05	PL6 0h	29.1705	25.8423	3.32815		-0.823371	1.76954	0.823371
E06	PL6 0h	29.1247	25.8527	3.27198		-0.879543	1.83979	0.879543
F04	PL6 3h	28.4162	26.0223	2.39389		-0.546408	1.46044	0.546408	0.507992	0.0422091
F05	PL6 3h	28.61	26.0934	2.51662		-0.423684	1.34135	0.423684
F06	PL6 3h	28.4667	26.0803	2.38642		-0.553884	1.46803	0.553884
G04	PL6 24h	28.8646	25.3654	3.49921		-0.109923	1.07917	0.109923	0.17473	0.0792793
G05	PL6 24h	28.6955	25.4188	3.27668		-0.332455	1.25915	0.332455
G06	PL6 24h	28.8136	25.2863	3.52732		-0.0818102	1.05835	0.0818102
H04	PL6 48h	29.9874	26.1947	3.79276		0.148551	0.902156	-0.148551	0.179379	0.198361
H05	PL6 48h	29.5289	26.4214	3.10751		-0.536704	1.45065	0.536704
H06	PL6 48h	29.7355	26.2413	3.49422		-0.149985	1.10956	0.149985
TRAESCS5D02G537600
A04	PL1 0h	40.3814	25.5635	14.8179	13.0177	1.80017	0.28714	-1.80017	-5.92119e-16	0.906089
A05	PL1 0h	37.4318	25.4946	11.9372		-1.08045	2.11469	1.08045
A06	PL1 0h	37.9075	25.6095	12.298		-0.719726	1.64687	0.719726
B04	PL1 3h	31.5539	25.7592	5.79472	5.70118	0.0935404	0.93722	-0.0935404	-2.38235e-16	0.0467792
B05	PL1 3h	31.4696	25.8136	5.65599		-0.0451851	1.03182	0.0451851
B06	PL1 3h	31.4963	25.8435	5.65282		-0.0483553	1.03409	0.0483553
C04	PL1 24h	41.0526	24.9859	16.0667	15.0257	1.04099	0.485994	-1.04099	-5.64363e-16	0.619772
C05	PL1 24h	39.0042	25.0817	13.9225		-1.10325	2.14839	1.10325
C06	PL1 24h	40.1993	25.1113	15.088		0.0622625	0.957761	-0.0622625
D04	PL1 48h	30.6104	25.6048	5.0056	5.14489	-0.139292	1.10136	0.139292	7.17019e-17	0.0709719
D05	PL1 48h	30.9137	25.6755	5.23819		0.0932978	0.937378	-0.0932978
D06	PL1 48h	30.9543	25.7634	5.19089		0.0459939	0.968622	-0.0459939
E04	PL6 0h	28.0628	25.6465	2.41632		-10.6014	1553.57	10.6014	10.7027	0.21448
E05	PL6 0h	28.3325	25.7071	2.62539		-10.3923	1343.98	10.3923
E06	PL6 0h	27.9962	26.0927	1.90342		-11.1143	2216.82	11.1143
F04	PL6 3h	28.2735	26.0457	2.22777		-3.47341	11.1071	3.47341	3.48062	0.117187
F05	PL6 3h	28.3363	25.9165	2.41984		-3.28134	9.7226	3.28134
F06	PL6 3h	28.0119	25.9978	2.01408		-3.6871	12.8803	3.6871
G04	PL6 24h	27.6146	25.2557	2.35883		-12.6669	6503.11	12.6669	12.531	0.0737862
G05	PL6 24h	27.7687	25.2558	2.51285		-12.5129	5844.61	12.5129
G06	PL6 24h	27.8504	25.2379	2.61249		-12.4132	5454.56	12.4132
H04	PL6 48h	29.4128	26.2113	3.20152		-1.94337	3.84603	1.94337	2.1123	0.0850729
H05	PL6 48h	29.2436	26.2779	2.96571		-2.17918	4.52897	2.17918
H06	PL6 48h	29.2216	26.291	2.93054		-2.21435	4.64072	2.21435
